# Supplementary material for: Are activation barriers of 50–70 kcal mol−1 accessible for transformations in organic synthesis in solution?
Source: Royal Society of Chemistry journal article supplement (doi:10.1039/d4sc08243e), 2025-01-01
Supplement: d4sc08243e1.pdf [file d4sc08243e1.pdf]

*Supporting information for the article*

**Are activation barriers of 50-70 kcal mol<sup>-1</sup> accessible for transformations  
in organic synthesis in solution?**

Ruslan R. Shaydullin, Alexey S. Galushko, Valentina V. Ilyushenkova, Yulia S. Vlasova, Valentine  
P. Ananikov\*

Zelinsky Institute of Organic Chemistry, Russian Academy of Sciences, Moscow 119991, Russia

(\*) E-mail: val@ioc.ac.ru; <https://AnanikovLab.ru>

Contents

|                                                               |     |
|---------------------------------------------------------------|-----|
| General experimental information.....                         | S2  |
| Theoretical calculations.....                                 | S4  |
| Synthetic method.....                                         | S16 |
| Catalyst search.....                                          | S22 |
| Kinetics measurement.....                                     | S23 |
| Mechanistic study.....                                        | S30 |
| Preparation of pyrazoles and isomerization reactions.....     | S32 |
| <sup>1</sup> H NMR, <sup>13</sup> C NMR spectra and HRMS..... | S36 |
| X-ray crystallographic data and refinement details.....       | S66 |
| References.....                                               | S74 |

## General experimental information

### General procedures.

All reagents were purchased and used as received except when indicated. Chemical shifts ( $\delta$ ) are given in ppm downfield from Me<sub>4</sub>Si and refer to the internal standard to the residual solvent (unless indicated) CDCl<sub>3</sub>: ( $\delta$  = 7.26 for <sup>1</sup>H and 77.00 for <sup>13</sup>C). The coupling constants, *J*, are reported in Hertz (Hz). TLC was carried out on SiO<sub>2</sub>, and the spots were located with UV light. Flash chromatography was carried out on SiO<sub>2</sub>. The organic extracts were dried over anhydrous Na<sub>2</sub>SO<sub>4</sub> during the reactions. Evaporation of the solvents was accomplished with a rotatory evaporator.

### Caution for high temperature reactions.

We urge researchers to be careful when conducting any high temperature experiments and ensure that special precautions be taken. Glass capillaries can explode at high pressures and temperatures, producing dangerous sharp fragments. The necessary precautions should be taken and appropriately configured laboratory environment should be arranged.

### Computational details.

Geometry optimization for pyrazoles and vibrational frequency calculations were performed via the PBE1PBE (PBE0)<sup>1,2</sup> hybrid functional and def2TZVP<sup>3,4</sup> basis set, the D3 version of Grimme's dispersion with Becke–Johnson damping (GD3BJ)<sup>5,6</sup> in Gaussian16<sup>7</sup>. The SMD model (solvation model based on the charge density of solute molecules) was used as a continuum model of the solvent (*p*-xylene) media.<sup>8</sup> For all the structures, the thermodynamic parameters were calculated at 298.15 K and 1 atm. For all structures the calculations were also carried out at 773 K and 35 atm. This temperature and pressure are approximately the same as the conditions for synthesis. Stationary points were characterized as minima by evaluating the elements of the Hessian matrix. All the observed transition states had one negative vibrational mode corresponding to the reaction path. Visualization and analysis of optimized structures were performed using CYLview program.<sup>9</sup>

### ESI-HRMS study.

The samples for the ESI-TOF-HRMS experiments were prepared in 1.8 mL glass vials with screwtop caps fitted with Teflon-lined septa (Agilent Technologies). High-resolution mass spectra (HRMS) were recorded on a Bruker maXis q-TOF (tandem quadrupole/time-of-flight mass analyzer) mass spectrometer equipped with an electrospray ionization (ESI) source. The *m/z* scanning range was 50–3000. The measurements were carried out in positive ion mode (+) (ground spray needle, –4500 V high-voltage capillary; 500 V HV end plate) and in negative ion mode (–) (ground spray needle, +4000 V high-voltage capillary; –500 V HV end plate offset). External calibration of the mass scale was carried out via the low-concentration calibration solution “tuning mix” (Agilent Technologies). The samples were injected via a 500  $\mu$ L Hamilton RN 1750 syringe (Switzerland). The flow rate during injection was controlled with a syringe pump (3  $\mu$ L/min).

Nitrogen was used as the nebulizer gas (1.0 bar) and dry gas (4.0 L/min, 200 °C). The data were processed via Bruker Data Analysis 4.0 software.

#### **NMR study.**

NMR spectra were recorded via Bruker Fourier 300HD spectrometers operating at 300.1 MHz for  $^1\text{H}$  and 76 MHz for  $^{13}\text{C}$ . The  $^1\text{H}$  and  $^{13}\text{C}$  NMR chemical shifts are reported relative to the solvent signals as internal standards: 2.50 ppm/39.5 ppm for DMSO- $d_6$  and 7.26 ppm/77.2 ppm for  $\text{CDCl}_3$ . All the measurements were performed at room temperature.

#### **X-ray crystallographic data and refinement details.**

X-ray diffraction data were collected at 100 K on a four-circle Rigaku Synergy S diffractometer equipped with a HyPix6000HE area detector (kappa geometry, shutterless  $\omega$ -scan technique) using graphite monochromatized Cu  $K_\alpha$ -radiation. The intensity data were integrated and corrected for absorption and decay via the CrysAlisPro program<sup>10</sup>. The structure was solved via direct methods via SHELXT<sup>11</sup> and refined on  $F^2$  via SHELXL-2018<sup>12</sup> in the OLEX2 program.<sup>13</sup> All nonhydrogen atoms were refined with individual anisotropic displacement parameters. All hydrogen atoms were placed in ideal calculated positions and refined as riding atoms with relatively isotropic displacement parameters. The Mercury program suite<sup>14</sup> was used for molecular graphics. The structures have been deposited at the Cambridge Crystallographic Data Center with the reference CCDC numbers 2419386.

#### **GC-MC analysis.**

The system consists of a gas chromatograph (Agilent Technologies 7890B) coupled with a quadrupole mass spectrometer equipped with an electron ionization source (Agilent Technologies 5977A MSD). NIST 2017 mass spectral library software, version 2.3 (Gaiticsburg, Pennsylvania, USA), was used to collect and process the data.

GC-MS analysis was performed on a HP Agilent 5 ms capillary column with a length of 30 m, an I.D. of 0.25 mm, and  $d_f$  of 0.25  $\mu\text{m}$ , carrier gas - helium, injector temperature - 270 °C, initial chromatograph oven temperature - 60 °C, heating rate 10 °C/min to 300 °C, followed by isotherm for 5 min; MS parameters: electron ionization at 70 eV, source temperature - 230 °C.

Sample preparation for GC/MS analysis. Two microliters of the upper reaction layer was transferred to a vial and diluted with 1 ml of ACN (HPLC). A 1  $\mu\text{l}$  solution was injected into the GC/MS system.

#### **TGA analysis.**

Instrument used for TGA analysis - DTG-60H "Shimadzu", heating rate 10 °C/min, temperature range 30–450 (850) °C

## Theoretical calculations

**XYZ coordinates, total energy (E), enthalpy (H) and Gibbs free energy (G) values for optimized structures**

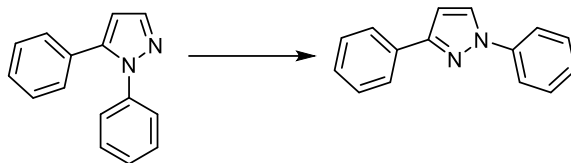

|                                          | $\Delta E$ ( $\Delta E^\ddagger$ ),<br>kcal/mol | $\Delta H$ ( $\Delta H^\ddagger$ ),<br>kcal/mol | $\Delta G$ ( $\Delta G^\ddagger$ ),<br>kcal/mol | $K = \exp(-\Delta G/RT)$ | $k$ , $s^{-1}$ | $t_{1/2}$ , s |
|------------------------------------------|-------------------------------------------------|-------------------------------------------------|-------------------------------------------------|--------------------------|----------------|---------------|
| 298.15 K; 1 atm                          | -3.3 (57.2)                                     | -3.3 (54.8)                                     | -3.8 (55.2)                                     |                          |                |               |
| 773 K; 35 atm<br>(experiment conditions) | -3.3 (57.2)                                     | -3.2 (54.5)                                     | -4.6 (56.1)                                     | 20.2                     | 0.0022         | 315           |

|                                 | 298.15 K; 1 atm |             | 773 K; 35 atm  |  | 298.15 K; 1 atm |              | 773 K; 35 atm  |             |
|---------------------------------|-----------------|-------------|----------------|--|-----------------|--------------|----------------|-------------|
| Total Energy                    | -687.790550 Eh  |             | -687.705926 Eh |  | -687.795774 Eh  |              | -687.795774 Eh |             |
| Total Enthalpy                  | -687.543021 Eh  |             | -687.475879 Eh |  | -687.548221 Eh  |              | -687.481007 Eh |             |
| Total Gibbs free energy         | -687.597184 Eh  |             | -687.705926 Eh |  | -687.603197 Eh  |              | -687.713285 Eh |             |
| Number of imaginary frequencies | 0               |             | 0              |  | 0               |              | 0              |             |
| C                               | -4.90381700     | 1.68831000  | -0.13280400    |  | C               | -10.92342900 | 3.30415800     | 0.88596000  |
| C                               | -4.40788000     | 0.40363700  | -0.22751900    |  | C               | -12.10818300 | 2.63907200     | 1.28087700  |
| C                               | -3.03430200     | 0.52348300  | 0.02229500     |  | C               | -11.85437200 | 1.31212100     | 1.06791100  |
| N                               | -3.82995200     | 2.48237700  | 0.14504000     |  | N               | -10.59240200 | 1.22553300     | 0.57961800  |
| N                               | -2.69057700     | 1.77877400  | 0.24553200     |  | N               | -10.02070000 | 2.42871300     | 0.46254400  |
| C                               | -3.76941700     | 3.89086600  | 0.25803300     |  | C               | -9.89354700  | 0.06670100     | 0.19048200  |
| C                               | -6.29279500     | 2.14319600  | -0.21303100    |  | C               | -10.28790600 | -1.18157800    | 0.65849200  |
| C                               | -4.44608600     | 4.69884600  | -0.64529500    |  | C               | -9.59819600  | -2.31316400    | 0.25520500  |
| C                               | -3.00587900     | 4.45059000  | 1.27328700     |  | C               | -8.80389900  | 0.18124000     | -0.66496800 |
| C                               | -2.93254600     | 5.82876700  | 1.38995100     |  | C               | -8.11769000  | -0.95722500    | -1.05181200 |
| C                               | -3.62283800     | 6.64510200  | 0.50485400     |  | C               | -8.51134500  | -2.20873000    | -0.59986500 |
| C                               | -4.37655300     | 6.07615400  | -0.51132700    |  | H               | -7.26898800  | -0.86277100    | -1.71952900 |
| H                               | -2.47480400     | 3.79916000  | 1.95569200     |  | H               | -8.51020500  | 1.16110100     | -1.01607700 |
| H                               | -2.33611800     | 6.26648300  | 2.18213600     |  | H               | -7.97186800  | -3.09644100    | -0.90819900 |
| H                               | -3.56747400     | 7.72304700  | 0.60265400     |  | H               | -9.90947800  | -3.28324600    | 0.62524000  |
| H                               | -4.90635500     | 6.70693300  | -1.21568600    |  | H               | -11.11516400 | -1.27333300    | 1.35070700  |
| H                               | -5.01712300     | 4.25195400  | -1.44879900    |  | C               | -10.62852700 | 4.73693100     | 0.90652200  |
| C                               | -6.82761600     | 3.02740800  | 0.72472800     |  | C               | -11.60433500 | 5.66056600     | 1.27916200  |
| C                               | -7.12005700     | 1.64859800  | -1.22080200    |  | C               | -9.36234400  | 5.20680800     | 0.55307100  |
| C                               | -8.44875400     | 2.03502000  | -1.29465900    |  | C               | -11.32381400 | 7.01726800     | 1.29787800  |
| C                               | -8.96927600     | 2.92230700  | -0.36421000    |  | C               | -9.08423600  | 6.56211600     | 0.57221300  |
| C                               | -8.15443500     | 3.41466900  | 0.64595200     |  | C               | -10.06290900 | 7.47449600     | 0.94463400  |
| H                               | -9.07806000     | 1.64540000  | -2.08679200    |  | H               | -9.84304100  | 8.53592200     | 0.95953300  |
| H                               | -6.70955200     | 0.96684800  | -1.95704000    |  | H               | -12.09555700 | 7.72081100     | 1.58945400  |
| H                               | -8.55623500     | 4.10086100  | 1.38277400     |  | H               | -12.59483400 | 5.31699200     | 1.55411200  |
| H                               | -10.00764700    | 3.22773900  | -0.42367300    |  | H               | -8.09524500  | 6.91043000     | 0.29575600  |
| H                               | -6.20247900     | 3.40612200  | 1.52439700     |  | H               | -8.59961400  | 4.49324200     | 0.26599100  |
| H                               | -4.98178500     | -0.49177300 | -0.40368900    |  | H               | -13.02126800 | 3.06533600     | 1.66234400  |
| H                               | -2.28116700     | -0.25050600 | 0.04935900     |  | H               | -12.47554100 | 0.44260500     | 1.20387200  |

TS

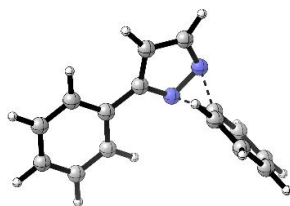

|                                 | <b>298.15 K; 1 atm</b>        |            | <b>773 K; 35 atm</b>          |
|---------------------------------|-------------------------------|------------|-------------------------------|
| Total Energy                    | -687.699456 Eh                |            | -687.699456 Eh                |
| Total Enthalpy                  | -687.455748 Eh                |            | -687.389016 Eh                |
| Total Gibbs free energy         | -687.509185 Eh                |            | -687.616571 Eh                |
| Number of imaginary frequencies | 1 (-600.80 cm <sup>-1</sup> ) |            | 1 (-600.80 cm <sup>-1</sup> ) |
| C                               | 0.8260000                     | 2.6766000  | 0.0601000                     |
| C                               | -0.4746000                    | 2.3397000  | 0.3773000                     |
| N                               | 1.3495000                     | 1.7451000  | -0.7604000                    |
| N                               | 0.3894000                     | 0.7559000  | -0.9345000                    |
| C                               | -0.7042000                    | 1.0946000  | -0.2151000                    |
| C                               | 1.8380000                     | 0.2137000  | -0.2543000                    |
| C                               | 2.6944000                     | -0.4561000 | -1.1272000                    |
| C                               | 1.8446000                     | -0.0669000 | 1.1061000                     |
| C                               | 2.7209000                     | -1.0247000 | 1.5910000                     |
| C                               | 3.5826000                     | -1.7008000 | 0.7401000                     |
| C                               | 3.5585000                     | -1.4061000 | -0.6197000                    |
| C                               | -1.8534000                    | 0.2059000  | -0.1323000                    |
| C                               | -3.0107000                    | 0.5893000  | 0.5481000                     |
| C                               | -4.0911000                    | -0.2708000 | 0.6396000                     |
| C                               | -1.8060000                    | -1.0615000 | -0.7178000                    |
| C                               | -2.8871000                    | -1.9200000 | -0.6206000                    |
| C                               | -4.0338000                    | -1.5295000 | 0.0570000                     |
| H                               | 1.4105000                     | 3.5338000  | 0.3594000                     |
| H                               | -1.1714000                    | 2.9292000  | 0.9534000                     |
| H                               | 2.6685000                     | -0.2192000 | -2.1832000                    |
| H                               | 1.1709000                     | 0.4580000  | 1.7729000                     |
| H                               | 2.7228000                     | -1.2419000 | 2.6535000                     |
| H                               | 4.2641000                     | -2.4479000 | 1.1279000                     |
| H                               | 4.2251000                     | -1.9248000 | -1.2999000                    |
| H                               | -3.0673000                    | 1.5694000  | 1.0074000                     |
| H                               | -4.9834000                    | 0.0427000  | 1.1696000                     |
| H                               | -0.9141000                    | -1.3654000 | -1.2524000                    |
| H                               | -2.8345000                    | -2.9014000 | -1.0783000                    |
| H                               | -4.8801000                    | -2.2028000 | 0.1303000                     |

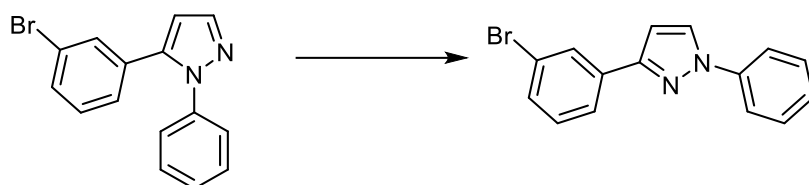

|                                          | $\Delta E$ ( $\Delta E^*$ ),<br>kcal/mol | $\Delta H$ ( $\Delta H^*$ ),<br>kcal/mol | $\Delta G$ ( $\Delta G^*$ ),<br>kcal/mol | $K = \exp(-\Delta G/RT)$ | $k$ , s <sup>-1</sup> | $t_{1/2}$ , s |
|------------------------------------------|------------------------------------------|------------------------------------------|------------------------------------------|--------------------------|-----------------------|---------------|
| 298.15 K; 1 atm                          | -3.7 (57.1)                              | -3.5 (54.7)                              | -3.7 (55.3)                              |                          |                       |               |
| 773 K; 35 atm<br>(experiment conditions) | -3.7 (57.1)                              | -3.5 (54.5)                              | -3.9 (56.3)                              | 12.7                     | 0.0019                | 365           |

| 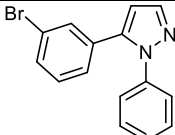 |                 |                 |  |                 |                 |             |             |
|-----------------------------------------------------------------------------------|-----------------|-----------------|-------------------------------------------------------------------------------------|-----------------|-----------------|-------------|-------------|
|                                                                                   | 298.15 K; 1 atm | 773 K; 35 atm   |                                                                                     | 298.15 K; 1 atm | 773 K; 35 atm   |             |             |
| Total Energy                                                                      | -3261.056302 Eh | -3261.056302 Eh | Total Energy                                                                        | -3261.062172 Eh | -3261.062172 Eh |             |             |
| Total Enthalpy                                                                    | -3260.817422 Eh | -3260.747698 Eh | Total Enthalpy                                                                      | -3260.823056 Eh | -3260.753337 Eh |             |             |
| Total Gibbs free energy                                                           | -3260.876326 Eh | -3260.994186 Eh | Total Gibbs free energy                                                             | -3260.882185 Eh | -3261.00041 Eh  |             |             |
| Number of imaginary frequencies                                                   | 0               | 0               | Number of imaginary frequencies                                                     | 0               | 0               |             |             |
| C                                                                                 | 0.32929600      | 3.35044700      | 0.01677600                                                                          | C               | -0.73676000     | 1.94541000  | -0.15959700 |
| C                                                                                 | -0.91499000     | 2.70630800      | 0.02116500                                                                          | C               | 0.63071100      | 1.98226300  | -0.16486400 |
| N                                                                                 | 1.32380500      | 2.48145300      | 0.00186800                                                                          | N               | -1.09543900     | 0.64336500  | -0.04161500 |
| N                                                                                 | 0.74126600      | 1.27263900      | -0.00061300                                                                         | N               | -0.03217100     | -0.16252300 | 0.02418900  |
| C                                                                                 | -0.61970700     | 1.35828500      | 0.01961700                                                                          | C               | 1.02934600      | 0.63088400  | -0.04629600 |
| C                                                                                 | 1.55967600      | 0.12281700      | -0.09762100                                                                         | C               | -2.39779900     | 0.10666600  | -0.00871700 |
| C                                                                                 | 2.69845800      | 0.04153400      | 0.69179900                                                                          | C               | -3.47327400     | 0.90248000  | 0.36779900  |
| C                                                                                 | 1.23766100      | -0.89631200     | -0.98316900                                                                         | C               | -2.59632200     | -1.22451400 | -0.35464900 |
| C                                                                                 | 2.05066100      | -2.01599100     | -1.05610000                                                                         | C               | -3.87619800     | -1.75159500 | -0.32787500 |
| C                                                                                 | 3.18658600      | -2.11066200     | -0.26550500                                                                         | C               | -4.95852800     | -0.96182700 | 0.03327200  |
| C                                                                                 | 3.51142900      | -1.07610500     | 0.60084200                                                                          | C               | -4.74988000     | 0.36475800  | 0.37965600  |
| C                                                                                 | -1.53511100     | 0.22054400      | 0.11633800                                                                          | C               | 2.38084100      | 0.07407000  | 0.00721100  |
| C                                                                                 | -2.69119400     | 0.21688100      | -0.66304300                                                                         | C               | 3.49093400      | 0.90915400  | -0.11120900 |
| C                                                                                 | -3.58549300     | -0.83303500     | -0.55215400                                                                         | C               | 4.76269400      | 0.36822000  | -0.05941000 |
| C                                                                                 | -1.30519700     | -0.83461400     | 0.99915300                                                                          | C               | 2.58061900      | -1.29662400 | 0.17707100  |
| C                                                                                 | -2.21077100     | -1.87671600     | 1.09075100                                                                          | C               | 3.86096200      | -1.81655000 | 0.22557600  |
| C                                                                                 | -3.36110900     | -1.88894000     | 0.31504000                                                                          | C               | 4.97029500      | -0.99008200 | 0.10771000  |
| H                                                                                 | 0.54318900      | 4.40919900      | 0.02328100                                                                          | H               | -1.46669800     | 2.73189500  | -0.25542700 |
| H                                                                                 | -1.89800300     | 3.14627400      | 0.06994000                                                                          | H               | 1.24945200      | 2.86038600  | -0.24966700 |
| H                                                                                 | 2.93619500      | 0.85717800      | 1.36283900                                                                          | H               | -3.31722700     | 1.92998100  | 0.67169800  |
| H                                                                                 | 0.36316300      | -0.80950600     | -1.61521400                                                                         | H               | -1.74559400     | -1.82783600 | -0.64137000 |
| H                                                                                 | 1.79920000      | -2.81258100     | -1.74661000                                                                         | H               | -4.02756700     | -2.79008900 | -0.59917100 |
| H                                                                                 | 3.82244900      | -2.98593300     | -0.33003500                                                                         | H               | -5.95845800     | -1.37895400 | 0.04924800  |
| H                                                                                 | 4.40164200      | -1.14002700     | 1.21584100                                                                          | H               | -5.58539200     | 0.98852000  | 0.67569800  |
| H                                                                                 | -2.87538200     | 1.02584500      | -1.35852600                                                                         | H               | 3.36452600      | 1.97547400  | -0.24535500 |
| Br                                                                                | -5.14722400     | -0.82737400     | -1.62148000                                                                         | Br              | 6.25754400      | 1.52047800  | -0.22259000 |
| H                                                                                 | -0.41973600     | -0.83310500     | 1.62228100                                                                          | H               | 1.71905600      | -1.94518900 | 0.27252900  |
| H                                                                                 | -2.02605100     | -2.69130000     | 1.78133300                                                                          | H               | 4.00579300      | -2.88263500 | 0.35843500  |
| H                                                                                 | -4.07032700     | -2.70352900     | 0.38698100                                                                          | H               | 5.97315200      | -1.39521400 | 0.14594700  |

TS

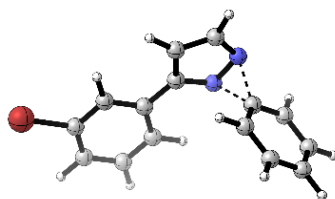

|                                 | <b>298.15 K; 1 atm</b>        |             | <b>773 K; 35 atm</b>          |
|---------------------------------|-------------------------------|-------------|-------------------------------|
| Total Energy                    | -3260.965315 Eh               |             | -3260.965315 Eh               |
| Total Enthalpy                  | -3260.730213 Eh               |             | -3260.660918 Eh               |
| Total Gibbs free energy         | -3260.788196 Eh               |             | -3260.904419 Eh               |
| Number of imaginary frequencies | 1 (-600.88 cm <sup>-1</sup> ) |             | 1 (-600.88 cm <sup>-1</sup> ) |
| C                               | 0.83150000                    | 2.66970000  | -0.02980000                   |
| C                               | -0.46390000                   | 2.33340000  | 0.30910000                    |
| N                               | 1.35190000                    | 1.72050000  | -0.83180000                   |
| N                               | 0.39770000                    | 0.72190000  | -0.97180000                   |
| C                               | -0.69070000                   | 1.07360000  | -0.25090000                   |
| C                               | 1.85650000                    | 0.20180000  | -0.29140000                   |
| C                               | 2.70760000                    | -0.48320000 | -1.15680000                   |
| C                               | 1.87710000                    | -0.04280000 | 1.07500000                    |
| C                               | 2.76460000                    | -0.98260000 | 1.57520000                    |
| C                               | 3.62210000                    | -1.67390000 | 0.73250000                    |
| C                               | 3.58300000                    | -1.41430000 | -0.63410000                   |
| C                               | -1.83330000                   | 0.18000000  | -0.13840000                   |
| C                               | -2.99440000                   | 0.59510000  | 0.51590000                    |
| C                               | -4.06100000                   | -0.27560000 | 0.63080000                    |
| C                               | -1.77480000                   | -1.11210000 | -0.66420000                   |
| C                               | -2.85350000                   | -1.96800000 | -0.53340000                   |
| C                               | -4.01040000                   | -1.56080000 | 0.11550000                    |
| H                               | 1.41390000                    | 3.53740000  | 0.24190000                    |
| H                               | -1.15790000                   | 2.93290000  | 0.87850000                    |
| H                               | 2.66940000                    | -0.27280000 | -2.21800000                   |
| H                               | 1.20720000                    | 0.49550000  | 1.73500000                    |
| H                               | 2.77890000                    | -1.17280000 | 2.64270000                    |
| H                               | 4.31280000                    | -2.40610000 | 1.13230000                    |
| H                               | 4.24680000                    | -1.94560000 | -1.30730000                   |
| H                               | -3.06500000                   | 1.59310000  | 0.92800000                    |
| Br                              | -5.62980000                   | 0.30720000  | 1.51630000                    |
| H                               | -0.87840000                   | -1.43700000 | -1.17750000                   |
| H                               | -2.79850000                   | -2.97040000 | -0.94190000                   |
| H                               | -4.85550000                   | -2.22940000 | 0.21710000                    |

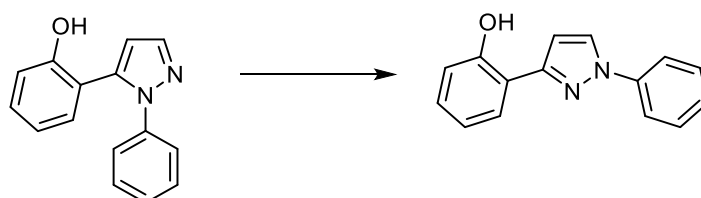

|                                          | $\Delta E$ ( $\Delta E^*$ ),<br>kcal/mol | $\Delta H$ ( $\Delta H^*$ ),<br>kcal/mol | $\Delta G$ ( $\Delta G^*$ ),<br>kcal/mol | $K = \exp(-\Delta G/RT)$ | $k, s^{-1}$ | $t_{1/2}, s$ |
|------------------------------------------|------------------------------------------|------------------------------------------|------------------------------------------|--------------------------|-------------|--------------|
| 298.15 K; 1 atm                          | -3.3 (56.3)                              | -3.3 (54.0)                              | -3.9 (54.5)                              |                          |             |              |
| 773 K; 35 atm<br>(experiment conditions) | -3.3 (56.3)                              | -3.2 (53.7)                              | -4.9 (55.4)                              | 24.1                     | 0.0035      | 198          |

| 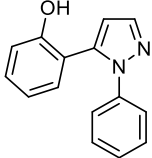 |                 |             |                |  |                 |             |                |             |
|-----------------------------------------------------------------------------------|-----------------|-------------|----------------|------------------------------------------------------------------------------------|-----------------|-------------|----------------|-------------|
|                                                                                   | 298.15 K; 1 atm |             | 773 K; 35 atm  |                                                                                    | 298.15 K; 1 atm |             | 773 K; 35 atm  |             |
| Total Energy                                                                      | -762.973237 Eh  |             | -762.973237 Eh |                                                                                    | -762.978524 Eh  |             | -762.978524 Eh |             |
| Total Enthalpy                                                                    | -762.720170 Eh  |             | -762.649135 Eh |                                                                                    | -762.725384 Eh  |             | -762.654292 Eh |             |
| Total Gibbs free energy                                                           | -762.776967 Eh  |             | -762.89197 Eh  |                                                                                    | -762.783159 Eh  |             | -762.899763 Eh |             |
| Number of imaginary frequencies                                                   | 0               |             | 0              |                                                                                    | 0               |             | 0              |             |
| C                                                                                 | 0.32991700      | 3.36044300  | 0.07756700     |                                                                                    | C               | -0.74220800 | 1.99227800     | -0.05339100 |
| C                                                                                 | -0.92397600     | 2.73704400  | 0.05061800     |                                                                                    | C               | 0.62423700  | 2.05738300     | -0.06333900 |
| N                                                                                 | 1.31189500      | 2.47720000  | 0.05277900     |                                                                                    | N               | -1.07492900 | 0.67945100     | -0.00698300 |
| N                                                                                 | 0.70903200      | 1.27881800  | 0.01186000     |                                                                                    | N               | 0.00462800  | -0.10692300    | 0.00990000  |
| C                                                                                 | -0.65284300     | 1.38492700  | 0.02073100     |                                                                                    | C               | 1.05466700  | 0.70862500     | -0.01933100 |
| C                                                                                 | 1.51069600      | 0.11996800  | -0.10019900    |                                                                                    | C               | -2.36403000 | 0.11414700     | -0.00627600 |
| C                                                                                 | 2.65545200      | 0.01680000  | 0.67858100     |                                                                                    | C               | -3.46134700 | 0.86986300     | 0.39101700  |
| C                                                                                 | 1.17002000      | -0.88870200 | -0.99126500    |                                                                                    | C               | -2.53130000 | -1.20714500    | -0.40462500 |
| C                                                                                 | 1.96887900      | -2.01706700 | -1.08065100    |                                                                                    | C               | -3.79919200 | -1.76304700    | -0.40964800 |
| C                                                                                 | 3.11039100      | -2.13285500 | -0.30083200    |                                                                                    | C               | -4.90227000 | -1.01261300    | -0.02789800 |
| C                                                                                 | 3.45432200      | -1.10956000 | 0.57131800     |                                                                                    | C               | -4.72552200 | 0.30380000     | 0.37126500  |
| C                                                                                 | -1.56286500     | 0.24141400  | 0.10973400     |                                                                                    | C               | 2.40384800  | 0.14078600     | 0.01980700  |
| C                                                                                 | -2.69447300     | 0.15578100  | -0.71052300    |                                                                                    | C               | 3.55938600  | 0.90112700     | -0.20260700 |
| C                                                                                 | -3.55396800     | -0.93226500 | -0.60686500    |                                                                                    | C               | 4.81545700  | 0.30545700     | -0.15978900 |
| C                                                                                 | -1.34109500     | -0.77921200 | 1.03394400     |                                                                                    | C               | 2.56862100  | -1.22136100    | 0.28484900  |
| C                                                                                 | -2.19497300     | -1.86239900 | 1.13988800     |                                                                                    | C               | 3.81495200  | -1.81631900    | 0.32673400  |
| C                                                                                 | -3.30498900     | -1.93736000 | 0.31138500     |                                                                                    | C               | 4.94737700  | -1.04568700    | 0.10251300  |
| H                                                                                 | 0.56002500      | 4.41550900  | 0.10865500     |                                                                                    | H               | -1.48636600 | 2.76959400     | -0.10277100 |
| H                                                                                 | -1.90012200     | 3.19183700  | 0.07436500     |                                                                                    | H               | 1.23161800  | 2.94296100     | -0.10281600 |
| H                                                                                 | 2.90868000      | 0.82380600  | 1.35432300     |                                                                                    | H               | -3.33183300 | 1.88831100     | 0.73493300  |
| H                                                                                 | 0.29031600      | -0.78612400 | -1.61334900    |                                                                                    | H               | -1.66475000 | -1.77956000    | -0.70671000 |
| H                                                                                 | 1.70147200      | -2.80490200 | -1.77532100    |                                                                                    | H               | -3.92459400 | -2.79338600    | -0.72241100 |
| H                                                                                 | 3.73479600      | -3.01539100 | -0.37785500    |                                                                                    | H               | -5.89271200 | -1.45205700    | -0.03693900 |
| H                                                                                 | 4.34860300      | -1.18919500 | 1.17868700     |                                                                                    | H               | -5.57705200 | 0.89733100     | 0.68365800  |
| O                                                                                 | -2.91250900     | 1.14635700  | -1.60497400    |                                                                                    | O               | 3.43298200  | 2.22474500     | -0.46685800 |
| H                                                                                 | -4.42299700     | -0.98562700 | -1.25647400    |                                                                                    | H               | 5.69537800  | 0.91738400     | -0.33826500 |
| H                                                                                 | -0.47655400     | -0.71154100 | 1.68371400     |                                                                                    | H               | 1.67702500  | -1.80971800    | 0.46330100  |
| H                                                                                 | -1.99749000     | -2.63972700 | 1.86776600     |                                                                                    | H               | 3.90364900  | -2.87535800    | 0.53728200  |
| H                                                                                 | -3.98519100     | -2.77860400 | 0.38015800     |                                                                                    | H               | 5.93444400  | -1.49263900    | 0.13304700  |
| H                                                                                 | -3.70685100     | 0.94403000  | -2.11026700    |                                                                                    | H               | 4.30913700  | 2.59807300     | -0.60744900 |



TS

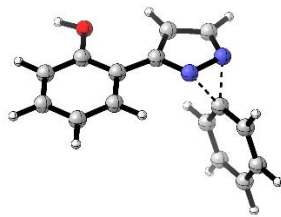

|                                 | <b>298.15 K; 1 atm</b>        |             | <b>773 K; 35 atm</b>          |
|---------------------------------|-------------------------------|-------------|-------------------------------|
| Total Energy                    | -762.883464 Eh                |             | -762.883463 Eh                |
| Total Enthalpy                  | -762.634187 Eh                |             | -762.563575 Eh                |
| Total Gibbs free energy         | -762.690131 Eh                |             | -762.803699 Eh                |
| Number of imaginary frequencies | 1 (-597.29 cm <sup>-1</sup> ) |             | 1 (-597.29 cm <sup>-1</sup> ) |
| C                               | -1.14110000                   | 1.33660000  | -0.51610000                   |
| C                               | 0.20540000                    | 1.63890000  | -0.47040000                   |
| N                               | -1.31530000                   | 0.00810000  | -0.38380000                   |
| N                               | -0.06260000                   | -0.55930000 | -0.19210000                   |
| C                               | 0.86200000                    | 0.43120000  | -0.20330000                   |
| C                               | -1.15560000                   | -0.81720000 | 1.06960000                    |
| C                               | -0.97720000                   | -0.08420000 | 2.23680000                    |
| C                               | -1.73880000                   | -2.08420000 | 1.10580000                    |
| C                               | -2.14270000                   | -2.60260000 | 2.32010000                    |
| C                               | -1.97500000                   | -1.88310000 | 3.49940000                    |
| C                               | -1.39070000                   | -0.62640000 | 3.44300000                    |
| C                               | 2.25500000                    | 0.11330000  | 0.06970000                    |
| C                               | 3.27550000                    | 1.07510000  | 0.04420000                    |
| C                               | 4.58600000                    | 0.71950000  | 0.33910000                    |
| C                               | 2.60830000                    | -1.19990000 | 0.39850000                    |
| C                               | 3.91030000                    | -1.55420000 | 0.69310000                    |
| C                               | 4.90530000                    | -0.58690000 | 0.66250000                    |
| H                               | -1.99050000                   | 1.99010000  | -0.64880000                   |
| H                               | 0.66200000                    | 2.60130000  | -0.62430000                   |
| H                               | -0.51990000                   | 0.89730000  | 2.19700000                    |
| H                               | -1.86570000                   | -2.63620000 | 0.18320000                    |
| H                               | -2.59740000                   | -3.58700000 | 2.34440000                    |
| H                               | -2.29530000                   | -2.29870000 | 4.44690000                    |
| H                               | -1.24870000                   | -0.05070000 | 4.35120000                    |
| O                               | 2.95630000                    | 2.35250000  | -0.27200000                   |
| H                               | 5.35890000                    | 1.48250000  | 0.31320000                    |
| H                               | 1.82660000                    | -1.94950000 | 0.41350000                    |
| H                               | 4.14880000                    | -2.58040000 | 0.94430000                    |
| H                               | 5.93300000                    | -0.84660000 | 0.88910000                    |
| H                               | 3.75500000                    | 2.88990000  | -0.24730000                   |

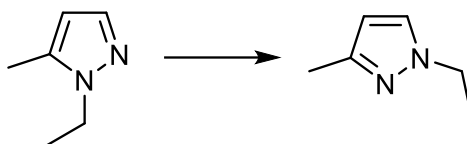

|                                          | $\Delta E$ ( $\Delta E^\ddagger$ ),<br>kcal/mol | $\Delta H$ ( $\Delta H^\ddagger$ ),<br>kcal/mol | $\Delta G$ ( $\Delta G^\ddagger$ ),<br>kcal/mol | $K = \exp(-\Delta G/RT)$ | $k$ , $s^{-1}$      | $t_{1/2}$ , s |
|------------------------------------------|-------------------------------------------------|-------------------------------------------------|-------------------------------------------------|--------------------------|---------------------|---------------|
| 298.15 K; 1 atm                          | 0.0 (68.7)                                      | -0.2 (66.0)                                     | -0.6 (65.9)                                     |                          |                     |               |
| 773 K; 35 atm<br>(experiment conditions) | 0.0 (68.7)                                      | -0.1 (66.0)                                     | -1.4 (65.7)                                     | 2.4                      | $4.3 \cdot 10^{-6}$ | 161722 (45 h) |

| 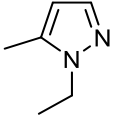 |                        |                      |  |                        |                      |             |             |
|-----------------------------------------------------------------------------------|------------------------|----------------------|-------------------------------------------------------------------------------------|------------------------|----------------------|-------------|-------------|
|                                                                                   | <b>298.15 K; 1 atm</b> | <b>773 K; 35 atm</b> |                                                                                     | <b>298.15 K; 1 atm</b> | <b>773 K; 35 atm</b> |             |             |
| Total Energy                                                                      | -343.889992 Eh         | -343.889992          | Total Energy                                                                        | -343.890048 Eh         | -343.890048 Eh       |             |             |
| Total Enthalpy                                                                    | -343.725023 Eh         | -343.686622          | Total Enthalpy                                                                      | -343.725284 Eh         | -343.68678 Eh        |             |             |
| Total Gibbs free energy                                                           | -343.767002 Eh         | -343.843031          | Total Gibbs free energy                                                             | -343.767983 Eh         | -343.84523 Eh        |             |             |
| Number of imaginary frequencies                                                   | 0                      | 0                    | Number of imaginary frequencies                                                     | 0                      | 0                    |             |             |
| C                                                                                 | -0.23718000            | -1.71165800          | -0.76843400                                                                         | C                      | 0.57835700           | -1.71251200 | -0.64014700 |
| C                                                                                 | 0.38197500             | -2.44252800          | 0.40614700                                                                          | C                      | 1.08264700           | -2.16759600 | 0.71370900  |
| H                                                                                 | -1.16602000            | -2.19109400          | -1.08191100                                                                         | H                      | 0.15079500           | -2.55161400 | -1.19360500 |
| H                                                                                 | 0.44161200             | -1.71090800          | -1.62266200                                                                         | H                      | 1.38837100           | -1.29428900 | -1.24022800 |
| H                                                                                 | 1.30705700             | -1.95155700          | 0.71384100                                                                          | H                      | 1.53056000           | -1.33660500 | 1.26361100  |
| H                                                                                 | 0.61429100             | -3.47345000          | 0.12887000                                                                          | H                      | 1.83865000           | -2.94663500 | 0.59034400  |
| H                                                                                 | -0.29673200            | -2.46327600          | 1.26202700                                                                          | H                      | 0.26363100           | -2.57385800 | 1.30936400  |
| C                                                                                 | -1.45940000            | 1.53370500           | 0.19159500                                                                          | C                      | -1.53287000          | 1.19943000  | -0.48860500 |
| C                                                                                 | -0.10382000            | 1.70982800           | -0.12036500                                                                         | C                      | -0.32031300          | 0.62310900  | -0.78957000 |
| C                                                                                 | -1.70473600            | 0.19453100           | -0.03885800                                                                         | C                      | -2.33705300          | 0.13079000  | -0.04675600 |
| N                                                                                 | 0.45181400             | 0.57480600           | -0.51306900                                                                         | N                      | -0.43868000          | -0.69187800 | -0.53339100 |
| N                                                                                 | -0.53246200            | -0.33076600          | -0.46324200                                                                         | N                      | -1.65477500          | -1.00837800 | -0.07797500 |
| C                                                                                 | -2.94784400            | -0.60245800          | 0.10629100                                                                          | C                      | -3.75364200          | 0.15673500  | 0.40301200  |
| H                                                                                 | -2.17042100            | 2.27036300           | 0.53054600                                                                          | H                      | -1.80321900          | 2.23937700  | -0.58153900 |
| H                                                                                 | 0.48838800             | 2.61270400           | -0.08234200                                                                         | H                      | 0.60098400           | 1.04288600  | -1.16328100 |
| H                                                                                 | -3.26757500            | -1.03410900          | -0.84670000                                                                         | H                      | -4.41703300          | 0.51163300  | -0.39048900 |
| H                                                                                 | -3.75296500            | 0.03688400           | 0.46803500                                                                          | H                      | -3.88638400          | 0.82186100  | 1.26057300  |
| H                                                                                 | -2.82768300            | -1.42381700          | 0.81833200                                                                          | H                      | -4.07172700          | -0.84535500 | 0.69297400  |

TS

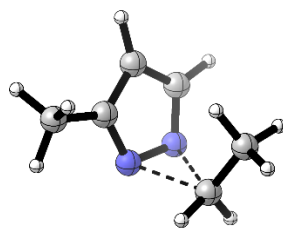

|                                 | <b>298.15 K; 1 atm</b>        |             | <b>773 K; 35 atm</b>          |
|---------------------------------|-------------------------------|-------------|-------------------------------|
| Total Energy                    | -343.780541 Eh                |             | -343.780541 Eh                |
| Total Enthalpy                  | -343.619778 Eh                |             | -343.581516 Eh                |
| Total Gibbs free energy         | -343.661979 Eh                |             | -343.738371 Eh                |
| Number of imaginary frequencies | 1 (-642.43 cm <sup>-1</sup> ) |             | 1 (-642.43 cm <sup>-1</sup> ) |
| C                               | 0.11680000                    | -1.73780000 | -0.96240000                   |
| C                               | 0.58740000                    | -1.87790000 | 0.43230000                    |
| H                               | -0.69970000                   | -2.40260000 | -1.21710000                   |
| H                               | 0.86480000                    | -1.70700000 | -1.74310000                   |
| H                               | 1.53750000                    | -1.37680000 | 0.61250000                    |
| H                               | 0.69410000                    | -2.94790000 | 0.64590000                    |
| H                               | -0.15570000                   | -1.48920000 | 1.13690000                    |
| C                               | -1.20240000                   | 0.94660000  | 0.60840000                    |
| C                               | 0.02910000                    | 0.97620000  | -0.02850000                   |
| C                               | -1.99110000                   | 0.08430000  | -0.15810000                   |
| N                               | -0.00790000                   | 0.22390000  | -1.13250000                   |
| N                               | -1.28720000                   | -0.33120000 | -1.21540000                   |
| C                               | -3.39410000                   | -0.36010000 | 0.05720000                    |
| H                               | -1.51080000                   | 1.51880000  | 1.47210000                    |
| H                               | 0.92820000                    | 1.51190000  | 0.24270000                    |
| H                               | -3.75980000                   | -0.88530000 | -0.82630000                   |
| H                               | -4.05610000                   | 0.48780000  | 0.24960000                    |
| H                               | -3.47510000                   | -1.03670000 | 0.91360000                    |

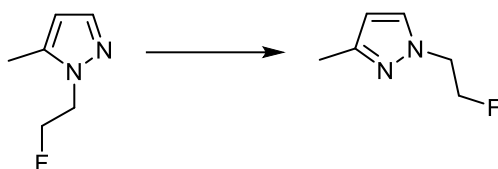

|                                          | $\Delta E$ ( $\Delta E^\ddagger$ ),<br>kcal/mol | $\Delta H$ ( $\Delta H^\ddagger$ ),<br>kcal/mol | $\Delta G$ ( $\Delta G^\ddagger$ ),<br>kcal/mol | $K = \exp(-\Delta G/RT)$ | $k$ , s <sup>-1</sup> | $t_{1/2}$ , s  |
|------------------------------------------|-------------------------------------------------|-------------------------------------------------|-------------------------------------------------|--------------------------|-----------------------|----------------|
| 298.15 K; 1 atm                          | 0.0 (69.4)                                      | -0.1 (67.1)                                     | -0.7 (67.5)                                     |                          |                       |                |
| 773 K; 35 atm<br>(experiment conditions) | 0.0 (69.4)                                      | -0.1 (66.9)                                     | -1.6 (68.3)                                     | 2.9                      | $7.9 \cdot 10^{-7}$   | 878722 (244 h) |

| 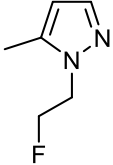 |                 |                |  |                 |                |             |             |
|-----------------------------------------------------------------------------------|-----------------|----------------|-------------------------------------------------------------------------------------|-----------------|----------------|-------------|-------------|
|                                                                                   | 298.15 K; 1 atm | 773 K; 35 atm  |                                                                                     | 298.15 K; 1 atm | 773 K; 35 atm  |             |             |
| Total Energy                                                                      | -443.076491 Eh  | -443.076491 Eh | Total Energy                                                                        | -443.076479 Eh  | -443.076479 Eh |             |             |
| Total Enthalpy                                                                    | -442.917707 Eh  | -442.877895 Eh | Total Enthalpy                                                                      | -442.917940 Eh  | -442.878006 Eh |             |             |
| Total Gibbs free energy                                                           | -442.962068 Eh  | -443.042654 Eh | Total Gibbs free energy                                                             | -442.963173 Eh  | -443.04523 Eh  |             |             |
| Number of imaginary frequencies                                                   | 0               | 0              | Number of imaginary frequencies                                                     | 0               | 0              |             |             |
| C                                                                                 | -0.25194200     | -1.70351400    | -0.76033500                                                                         | C               | 0.56622500     | -1.70344900 | -0.64752100 |
| C                                                                                 | 0.41094200      | -2.38713400    | 0.41745000                                                                          | C               | 1.04241100     | -2.13232800 | 0.72471400  |
| H                                                                                 | -1.18055100     | -2.21512300    | -1.01593300                                                                         | H               | 0.15457700     | -2.56119100 | -1.18326000 |
| H                                                                                 | 0.40983000      | -1.73068100    | -1.62719100                                                                         | H               | 1.39961200     | -1.29932800 | -1.22363200 |
| H                                                                                 | 1.35787600      | -1.90153700    | 0.66364800                                                                          | H               | 1.47707100     | -1.29045100 | 1.27077600  |
| F                                                                                 | 0.67003100      | -3.70610000    | 0.08120000                                                                          | F               | 2.02242400     | -3.10051200 | 0.57198700  |
| H                                                                                 | -0.23993800     | -2.38268100    | 1.29638000                                                                          | H               | 0.22303400     | -2.56112600 | 1.30516900  |
| C                                                                                 | -1.46732000     | 1.53863500     | 0.19312400                                                                          | C               | -1.53782400    | 1.20402200  | -0.49107200 |
| C                                                                                 | -0.10590500     | 1.70762400     | -0.10039100                                                                         | C               | -0.32603000    | 0.63127400  | -0.79410200 |
| C                                                                                 | -1.71915700     | 0.20256000     | -0.03978800                                                                         | C               | -2.34187200    | 0.13458100  | -0.04743600 |
| N                                                                                 | 0.44985700      | 0.57156600     | -0.48571500                                                                         | N               | -0.44404300    | -0.68574500 | -0.53870200 |
| N                                                                                 | -0.54222900     | -0.32947400    | -0.44909000                                                                         | N               | -1.66111700    | -1.00414700 | -0.07977900 |
| C                                                                                 | -2.96871800     | -0.58695000    | 0.08526200                                                                          | C               | -3.75699500    | 0.16243100  | 0.40546100  |
| H                                                                                 | -2.17810800     | 2.27985700     | 0.52203100                                                                          | H               | -1.81000600    | 2.24332400  | -0.58464800 |
| H                                                                                 | 0.49014200      | 2.60740900     | -0.05286300                                                                         | H               | 0.59359100     | 1.05124000  | -1.17149000 |
| H                                                                                 | -3.27716300     | -1.01305600    | -0.87378200                                                                         | H               | -4.41994800    | 0.52134100  | -0.38639900 |
| H                                                                                 | -3.77436700     | 0.05685200     | 0.43735300                                                                          | H               | -3.88548300    | 0.82650000  | 1.26434200  |
| H                                                                                 | -2.86498100     | -1.41105100    | 0.79674200                                                                          | H               | -4.07732700    | -0.83933100 | 0.69359100  |

TS

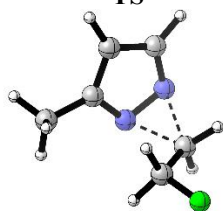

|                                 | <b>298.15 K; 1 atm</b>        |             | <b>773 K; 35 atm</b>          |
|---------------------------------|-------------------------------|-------------|-------------------------------|
| Total Energy                    | -442.965876 Eh                |             | -442,965876                   |
| Total Enthalpy                  | -442.810828 Eh                |             | -442,771359                   |
| Total Gibbs free energy         | -442.854497 Eh                |             | -442,933854                   |
| Number of imaginary frequencies | 1 (-654.29 cm <sup>-1</sup> ) |             | 1 (-654.29 cm <sup>-1</sup> ) |
| C                               | 0.34570000                    | -1.54500000 | -0.87280000                   |
| C                               | -0.20950000                   | -2.36330000 | 0.26000000                    |
| H                               | 0.27960000                    | -2.01320000 | -1.84570000                   |
| H                               | 1.36060000                    | -1.23110000 | -0.63670000                   |
| H                               | -0.35980000                   | -1.75770000 | 1.15590000                    |
| F                               | 0.74150000                    | -3.33400000 | 0.56620000                    |
| H                               | -1.13550000                   | -2.86890000 | -0.01680000                   |
| C                               | -1.07830000                   | 1.31000000  | 0.27950000                    |
| C                               | 0.02410000                    | 1.28830000  | -0.56520000                   |
| C                               | -1.79980000                   | 0.15720000  | -0.01540000                   |
| N                               | -0.05020000                   | 0.23530000  | -1.38160000                   |
| N                               | -1.19600000                   | -0.48100000 | -1.03200000                   |
| C                               | -3.04880000                   | -0.36810000 | 0.59650000                    |
| H                               | -1.35400000                   | 2.08960000  | 0.97510000                    |
| H                               | 0.83860000                    | 1.99390000  | -0.64840000                   |
| H                               | -3.46900000                   | -1.16180000 | -0.02280000                   |
| H                               | -3.79870000                   | 0.42010000  | 0.69470000                    |
| H                               | -2.87230000                   | -0.77320000 | 1.59740000                    |

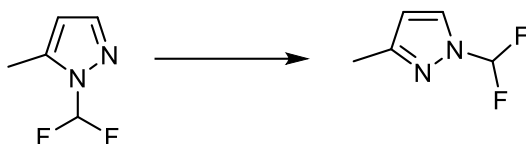

|                                          | $\Delta E$ ( $\Delta E^\ddagger$ ),<br>kcal/mol | $\Delta H$ ( $\Delta H^\ddagger$ ),<br>kcal/mol | $\Delta G$ ( $\Delta G^\ddagger$ ),<br>kcal/mol | $K = \exp(-\Delta G/RT)$ | $k$ , $s^{-1}$      | $t_{1/2}$ , s |
|------------------------------------------|-------------------------------------------------|-------------------------------------------------|-------------------------------------------------|--------------------------|---------------------|---------------|
| 298.15 K; 1 atm                          | -2.1 (68.4)                                     | -2.2 (66.2)                                     | -2.9 (66.0)                                     |                          |                     |               |
| 773 K; 35 atm<br>(experiment conditions) | -2.1 (68.4)                                     | -2.1 (65.9)                                     | -3.9 (65.9)                                     | 13.1                     | $3.7 \cdot 10^{-6}$ | 184210 (51 h) |

|                                 | 298.15 K; 1 atm | 773 K; 35 atm  |                                 | 298.15 K; 1 atm | 773 K; 35 atm  |             |             |
|---------------------------------|-----------------|----------------|---------------------------------|-----------------|----------------|-------------|-------------|
| Total Energy                    | -502.994285 Eh  | -502.994285 Eh | Total Energy                    | -502.997583 Eh  | -502.997583 Eh |             |             |
| Total Enthalpy                  | -502.872728 Eh  | -502.837333 Eh | Total Enthalpy                  | -502.876304 Eh  | -502.840758 Eh |             |             |
| Total Gibbs free energy         | -502.915245 Eh  | -502.991042 Eh | Total Gibbs free energy         | -502.919833 Eh  | -502.997335 Eh |             |             |
| Number of imaginary frequencies | 0               | 0              | Number of imaginary frequencies | 0               | 0              |             |             |
| C                               | -0.24338800     | -1.70334100    | -0.69017500                     | C               | 0.52315700     | -1.72774900 | -0.61528100 |
| F                               | 0.66106900      | -2.21916900    | 0.16838700                      | F               | 1.56146600     | -1.54197800 | 0.23217400  |
| H                               | -1.15905300     | -2.29401400    | -0.64503400                     | H               | 0.05110400     | -2.69172700 | -0.42772600 |
| F                               | 0.29223500      | -1.80544400    | -1.92405400                     | F               | 1.05158900     | -1.70028600 | -1.86076600 |
| C                               | -1.47145500     | 1.52080000     | 0.17847800                      | C               | -1.48835900    | 1.19650500  | -0.34322100 |
| C                               | -0.09021200     | 1.68075900     | -0.05247600                     | C               | -0.26866900    | 0.63405900  | -0.59374000 |
| C                               | -1.72247500     | 0.18969500     | -0.03782400                     | C               | -2.35117000    | 0.10839000  | -0.06027800 |
| N                               | 0.48427600      | 0.54648100     | -0.38648600                     | N               | -0.43555500    | -0.70362700 | -0.45854300 |
| N                               | -0.51620000     | -0.35286500    | -0.37551700                     | N               | -1.69907400    | -1.03675900 | -0.13419600 |
| C                               | -2.98350300     | -0.58649200    | 0.04817400                      | C               | -3.79549600    | 0.14403700  | 0.28227400  |
| H                               | -2.19102200     | 2.27104900     | 0.46432700                      | H               | -1.73499200    | 2.24622500  | -0.35891400 |
| H                               | 0.50308900      | 2.58135300     | 0.01288300                      | H               | 0.68727500     | 1.06188800  | -0.85189800 |
| H                               | -3.25667400     | -1.03004100    | -0.91321200                     | H               | -4.37658300    | 0.61471400  | -0.51490200 |
| H                               | -3.79350300     | 0.07704100     | 0.34911400                      | H               | -3.96821500    | 0.71861400  | 1.19599300  |
| H                               | -2.91950000     | -1.39032900    | 0.78677900                      | H               | -4.17102000    | -0.86810900 | 0.43370800  |

TS

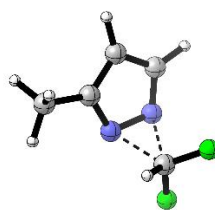

|                                 | <b>298.15 K; 1 atm</b>        |             | <b>773 K; 35 atm</b>          |  |
|---------------------------------|-------------------------------|-------------|-------------------------------|--|
| Total Energy                    | -502.885308 Eh                |             | -502.885308 Eh                |  |
| Total Enthalpy                  | -502.767273 Eh                |             | -502.732361 Eh                |  |
| Total Gibbs free energy         | -502.810013 Eh                |             | -502.886041 Eh                |  |
| Number of imaginary frequencies | 1 (-663.17 cm <sup>-1</sup> ) |             | 1 (-663.17 cm <sup>-1</sup> ) |  |
| C                               | 0.28170000                    | -1.52470000 | -0.41470000                   |  |
| F                               | 1.28410000                    | -1.24980000 | 0.43430000                    |  |
| H                               | -0.40810000                   | -2.17330000 | 0.12090000                    |  |
| F                               | 0.75380000                    | -2.07920000 | -1.50250000                   |  |
| C                               | -1.42480000                   | 1.30420000  | 0.23760000                    |  |
| C                               | -0.10620000                   | 1.29080000  | -0.20060000                   |  |
| C                               | -2.00110000                   | 0.14200000  | -0.26800000                   |  |
| N                               | 0.09230000                    | 0.24240000  | -0.99850000                   |  |
| N                               | -1.09630000                   | -0.47980000 | -1.04080000                   |  |
| C                               | -3.36960000                   | -0.40630000 | -0.08390000                   |  |
| H                               | -1.91490000                   | 2.07560000  | 0.81360000                    |  |
| H                               | 0.69210000                    | 1.99140000  | -0.00220000                   |  |
| H                               | -4.12920000                   | 0.30720000  | -0.41300000                   |  |
| H                               | -3.56950000                   | -0.63410000 | 0.96660000                    |  |
| H                               | -3.49060000                   | -1.32110000 | -0.66540000                   |  |

## Synthetic method

We strongly recommend following corresponding safety procedures. When heated, capillaries may explode with a loud bang.

### Capillary preparation method (HTCS):

Pasteur pipettes made of chemical glass (Borosilikatglas 5.1 230 mm Duran) were used in the manufacture of capillaries. The capillary was sealed from the thin part with a burner flame (pencil torch). The samples were then filled with a solution of the substance and sealed. In the synthesis of several tens of milligrams, several tens of capillaries were produced. Capillaries were placed in a vertical state in an aluminum thermoblock. Then, the samples were placed in a heating element. For induction heating, a graphite glass inside the induction heater was used. Otherwise, the samples were placed in a muffle furnace.

One should pay attention to the quality of the sealant, since this greatly affects the course of the experiment. Capillaries in which carbon soot had already formed due to the evaporation of solvent vapor and subsequent contact with the hot part of the glass were prone to rupture when heated to 500 °C. This is explained by the large defectiveness of glass at the sealing site due to the emergence of a new phase, such as amorphous carbon, during carbonization of the solvent at the junction, which significantly reduces the quality of this capillary. Another limiting factor in the use of chemical glass capillaries is the maximum synthesis temperature. Capillaries made of chemical glass begin to melt at approximately 700 °C. To overcome this limitation, quartz glass can be used, which increases the synthesis temperature to 1100–1200 °C. Quartz glass has fewer imperfections and a coefficient of thermal expansion, which allows syntheses to be carried out with greater internal pressure inside the capillary than when chemical glass is used.

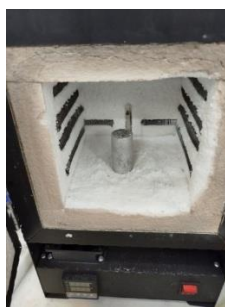

Figure S1. Muffle furnace “satellite” Russia. Maximum heating temperature: 1200 °C.



### Measurement of pressure inside the reaction medium:

In a vertical steel reactor with a volume of 60 mL, 15 mL of toluene was added. The reaction medium was purged with argon. The initial pressure was 1 atm. The reactor was then closed with an output to the monometer. The reactor was heated to 500 °C; after the set temperature was established after 10 minutes of heating, the pressure was measured. The pressure at the time of heating increased monotonically, and the highest recorded value was 32.3 bar. The reactor then cooled. After the experiment, the volume of the solution did not change.

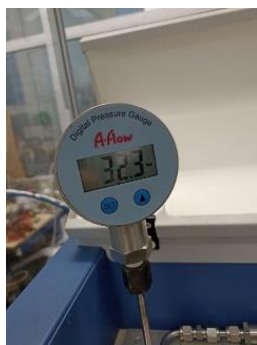

Figure S2. Photo of a steel reactor pressure gauge heated to 500 °C.

### Induction furnace for syntheses:

The induction heating board module (China, 1000 W, voltage 12-48 V) and power unit (China, CHUX S-1000-24, DC input 20-28 V 40 A) were used. Changing the voltage at the output of the power supply allows the temperature to be adjusted. The capillary was placed vertically inside an aluminum block, which was located in a craft glass. The graphite glass is located inside the inductor. Temperature measurements were carried out on the outer part of the aluminum block with a pyrometer (“KELVIN KB DIPOLE PYROCELSUS” Russia).

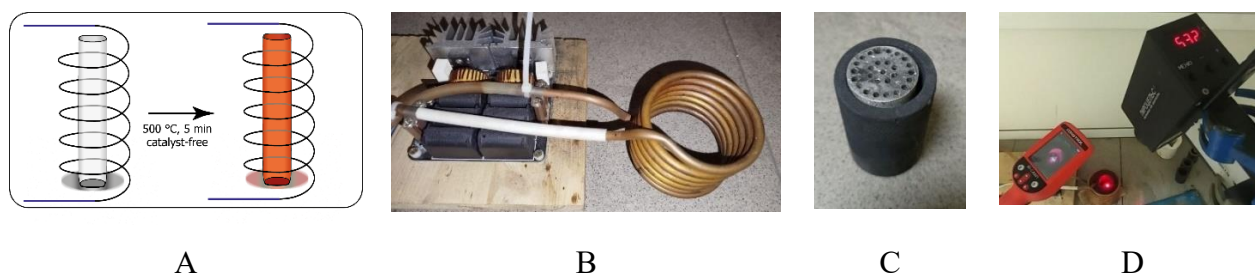

Figure S3. A - Schematic representation of induction heating in capillaries, B - photo of the inductor, C - photo of a graphite glass with an aluminum block for capillaries, and D - photo of an experiment with induction heating.

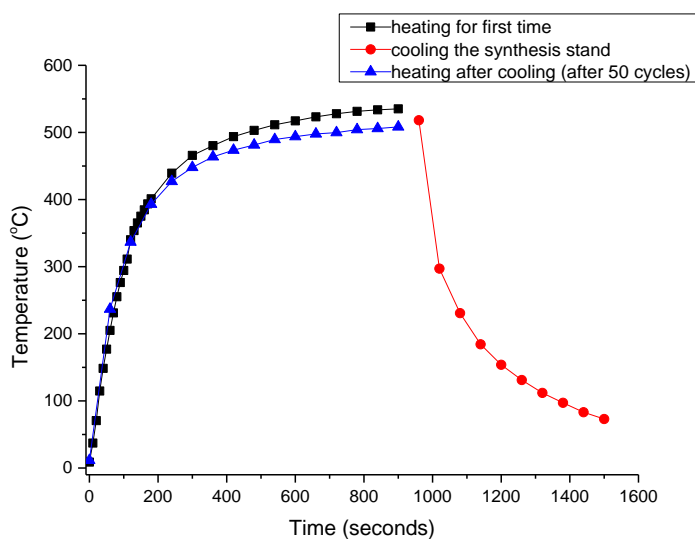

Figure S4. Induction heating operating mode.

### Influence of inert gas on the reaction:

The capillary, which is sealed on one side, is filled with the prepared mixture of 1,5-diphenylpyrazole in *p*-xylene. After that, the capillary is purged with argon via a gas ball with an outlet in the form of a syringe for 10–15 seconds. After that, the capillary was sealed. The capillary was then placed in a heating cassette and placed in a muffle furnace heated to the desired temperature.

There are no differences in the course of the reaction depending on the gas atmosphere that fills the capillary. There was no difference in the GC–MS data between the samples filled with argon and those filled with air. This is most likely due to the small amount of gas that is present in the capillary, which does not have a significant effect on the course of the reaction.

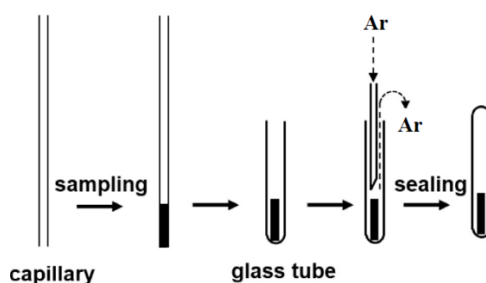

Figure S5. The capillary was sealed with blowing argon.

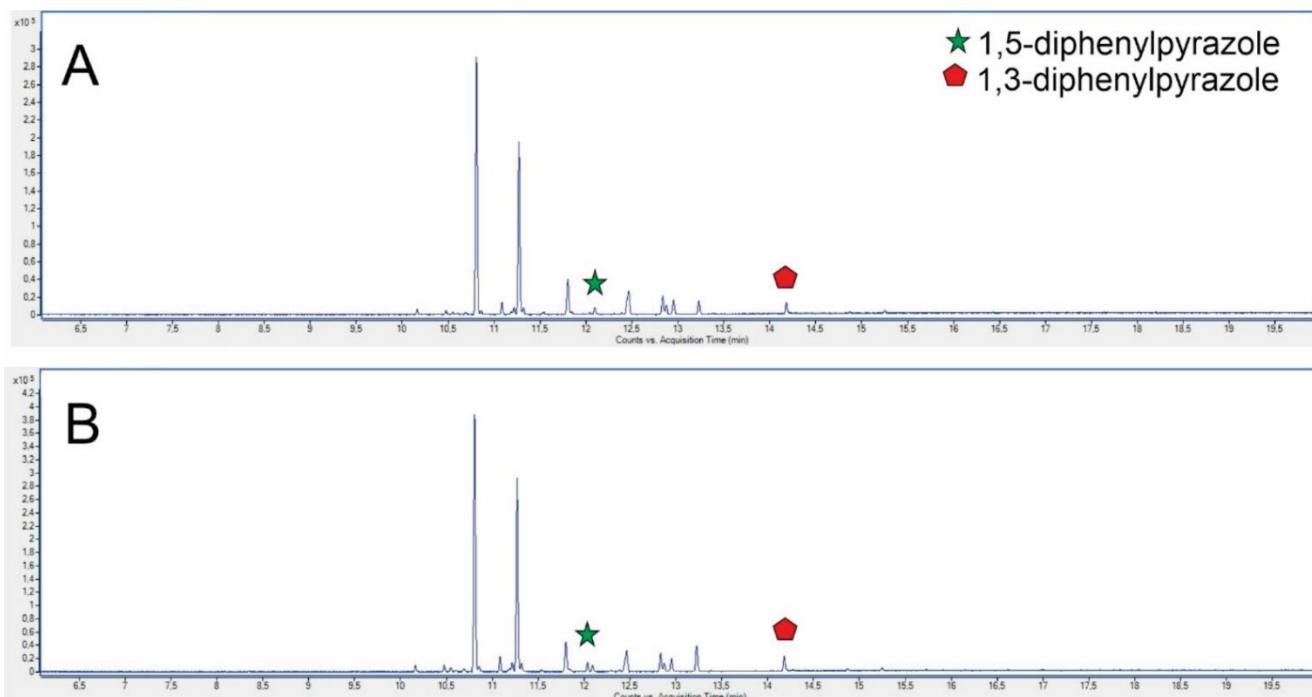

Figure S6. A - capillary filled with argon, B - capillary filled with air. GC–MS data of the reaction mixture after synthesis at 500 °C for 5 minutes.

**Various solvents for high-temperature organic synthesis:**

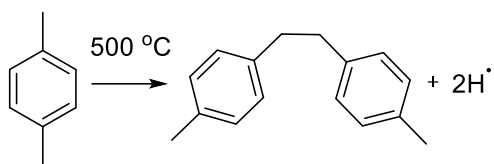

Scheme S1. Formation of expected byproduct.

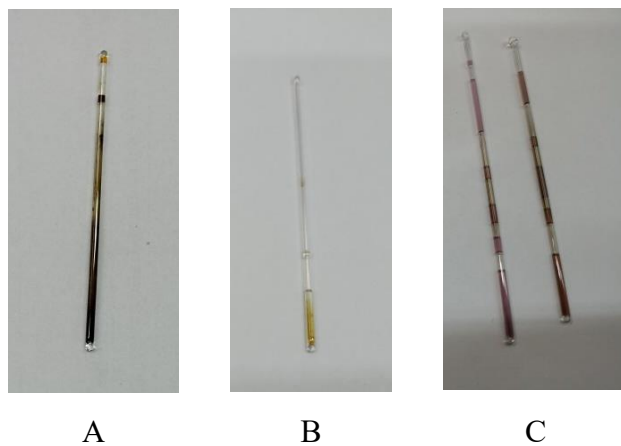

Figure S7. A - photo of the capillary after the reaction without solvent, B - photo of a capillary after the reaction in p-xylene, C - photo of a capillary with 1,2-dichloromethane after heating.

**Analysis of the stability of the isomerization reaction product and the starting 1,5-diphenylpyrazole:**

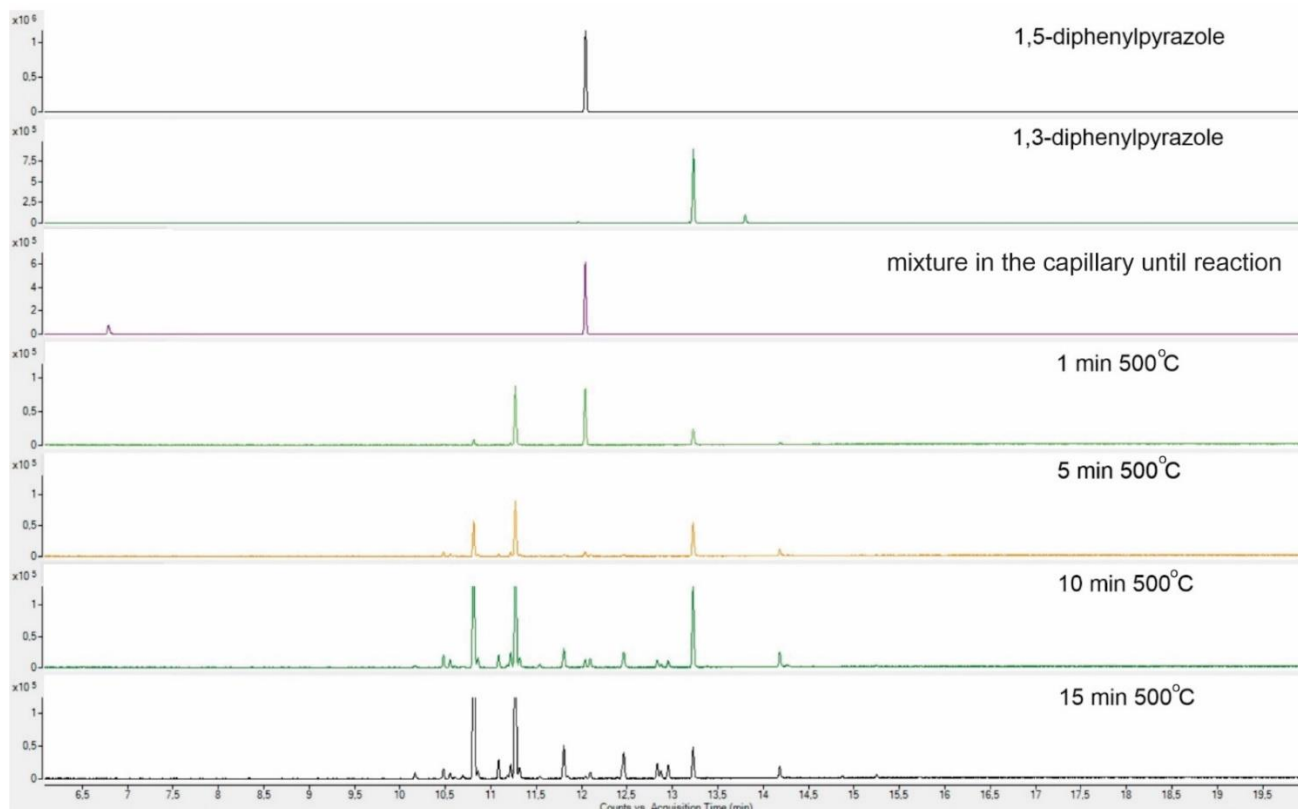

Figure S8. GC data for the isomerization of 1,5-diphenylpyrazole.

**TGA analysis:**

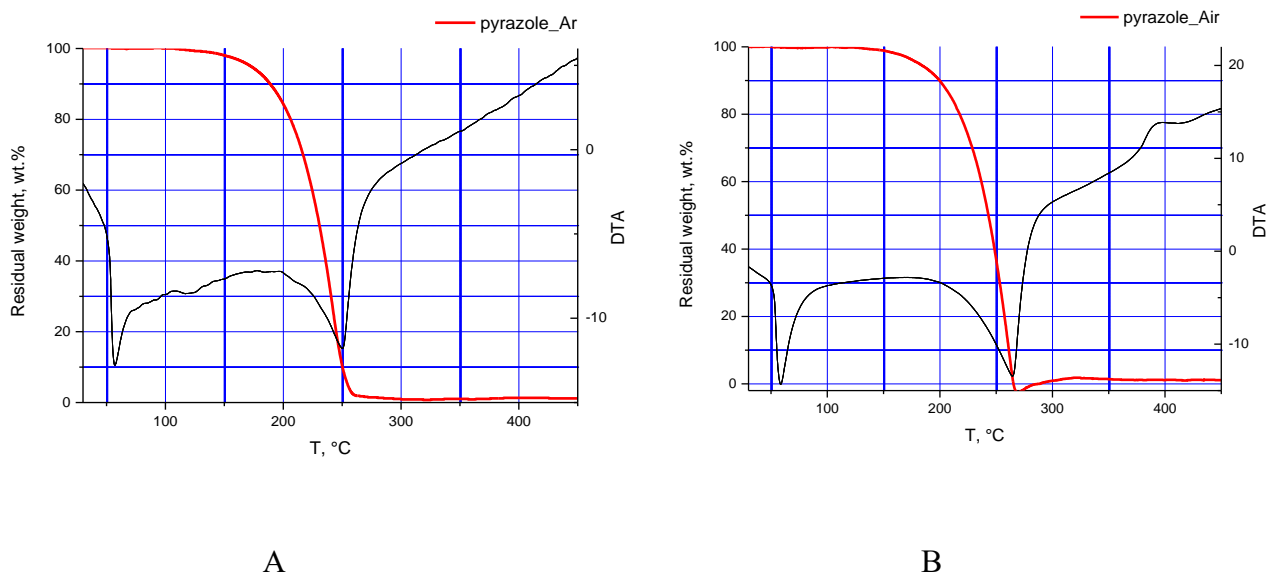

Figure S9. TGA results for heating 1,5-diphenylpyrazole in argon (A) and air (B).

## Catalyst search

The capillary was filled with a solution of 25  $\mu\text{L}$  of *p*-xylene in which 3 mg of 1,5-diphenylpyrazole was dissolved. A total of 0.5 mg of the substance being tested for catalytic activity was added to the capillary. The capillary was subsequently placed in an oven at 500  $^{\circ}\text{C}$  for 3 minutes. A reference capillary was placed in the oven together with a capillary with a substance being tested for catalytic activity without introducing the substance. After synthesis, the capillary was opened on both sides, and the contents were transferred into a vial, where 600  $\mu\text{L}$  of acetone- $d_6$  was added. After stirring, the mixture was transferred to an NMR tube.

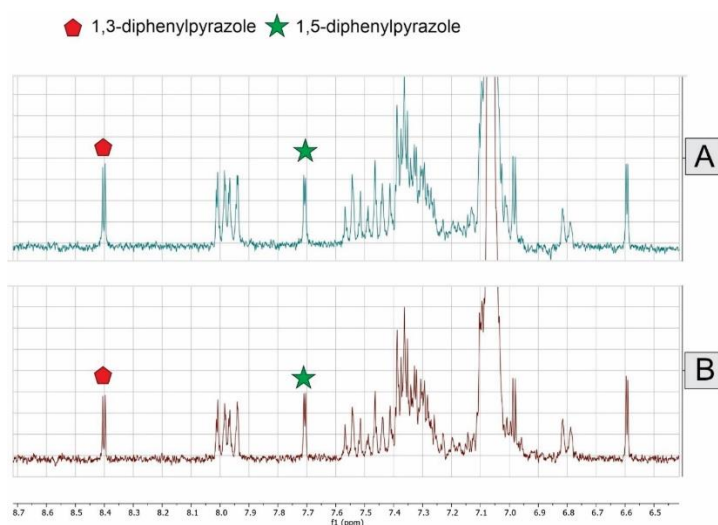

Figure S10. An example of a method for comparing and searching for substances with catalytic activity. A –  $^1\text{H}$  NMR experiment without additives. B –  $^1\text{H}$  NMR experiment with the addition of CuI.

*Tested substances for catalytic activity. Alkali, alkaline earth metals (bases):* NaOH, CsCl,  $\text{MgSO}_4$ , Zn(II) triflate,  $\text{Ba}(\text{OH})_2$ ,  $\text{Sr}(\text{OH})_2$ .

*Tested substances for catalytic activity. 3, 13 Group of elements:* Sc(III) triflate, Dy(III) triflate, Bi(III) triflate, Yb(III) triflate, Ce(III) triflate,  $\text{EuCl}_3$ , In(III) triflate, Al(III) triflate.

*Tested substances for catalytic activity. 11, 12 Group of elements:*  $\text{Cu}(\text{OAc})_2$ , CuSCN, CuI,  $\text{CuSO}_4$ , CuO, Cu,  $\text{Cu}_2\text{O}$ , CuBr, AgCN,  $\text{HgI}_2$ , Au salts.

*Tested substances for catalytic activity. 6, 7, 14 Group of elements:*  $\text{NH}_4\text{ReO}_4$ ,  $\text{CrCl}_3$ ,  $\text{MnO}_2$ ,  $\text{MoS}_2$ ,  $\text{Pb}(\text{C}_2\text{H}_5\text{O}_2)_2$ ,  $\text{SnCl}_2$ .

*Tested substances for catalytic activity. 8, 9, 10 Group of elements:* Pd/C (10%), Pd(II) acetate, Pd(II) chloride,  $\text{RuCl}_3$ ,  $\text{Ni}(\text{ClO}_4)_2$ ,  $\text{CoBr}_2$ , Fe(II) acetate.

*Tested substances for catalytic activity:*  $\text{Et}_2\text{O}\cdot\text{BF}_3$ , HCl, DBU.

All of the above compounds did not possess desired catalytic activity.

## Kinetics measurement

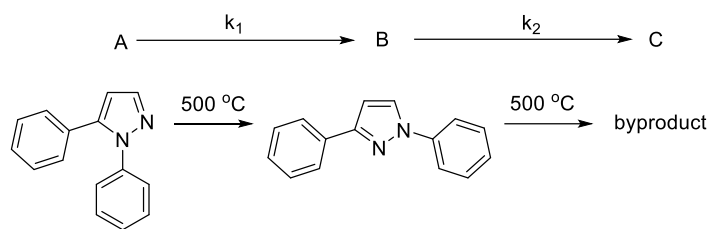

Formula S1. Kinetics of a sequential reaction for the isomerization of pyrazole.

$$\begin{cases}
 \frac{d[A]}{dt} = -k_1[A] \\
 \frac{d[B]}{dt} = k_1[A] - k_2[B] \\
 \frac{d[C]}{dt} = k_2[B]
 \end{cases}$$

$$[B]_0 = [C]_0 = 0$$

$$\begin{cases}
 [A] = A_0 \exp(-k_1 t) \\
 [B] = A_0 \frac{k_1}{k_2 - k_1} [\exp(-k_1 t) - \exp(-k_2 t)]
 \end{cases}$$

$$t_{max} = \frac{\ln\left(\frac{k_2}{k_1}\right)}{k_2 - k_1}$$

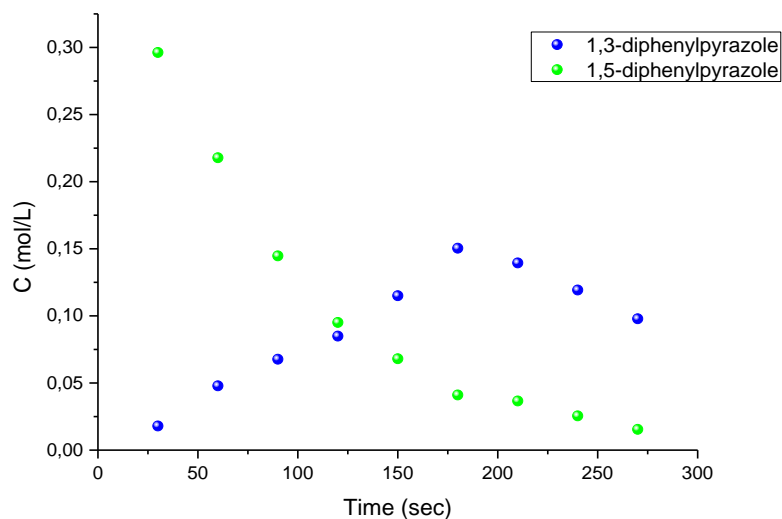

Figure S11. Kinetic curves of changes in the concentration of 1,3-diphenylpyrazole and 1,5-diphenylpyrazole at 500 °C.

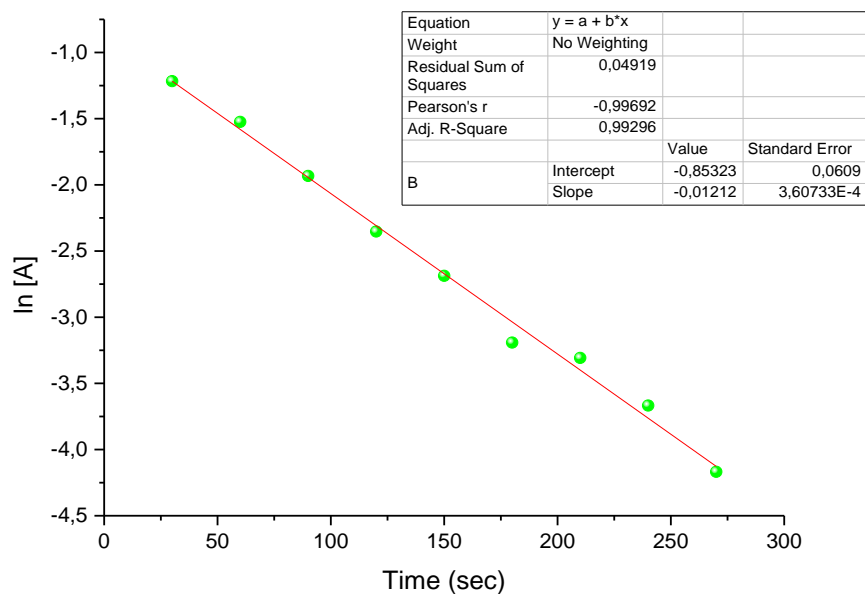

Figure S12. Logarithmic dependence of the change in the concentration of 1,3-diphenylpyrazole, the product of the isomerization reaction at 500 °C



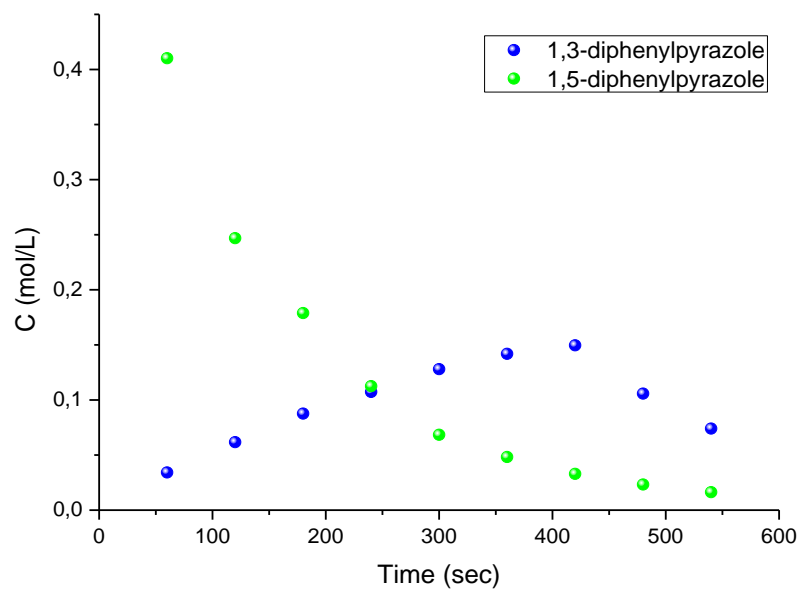

Figure S13. Kinetic curves of changes in the concentration of 1,3-diphenylpyrazole and 1,5-diphenylpyrazole at 480 °C.

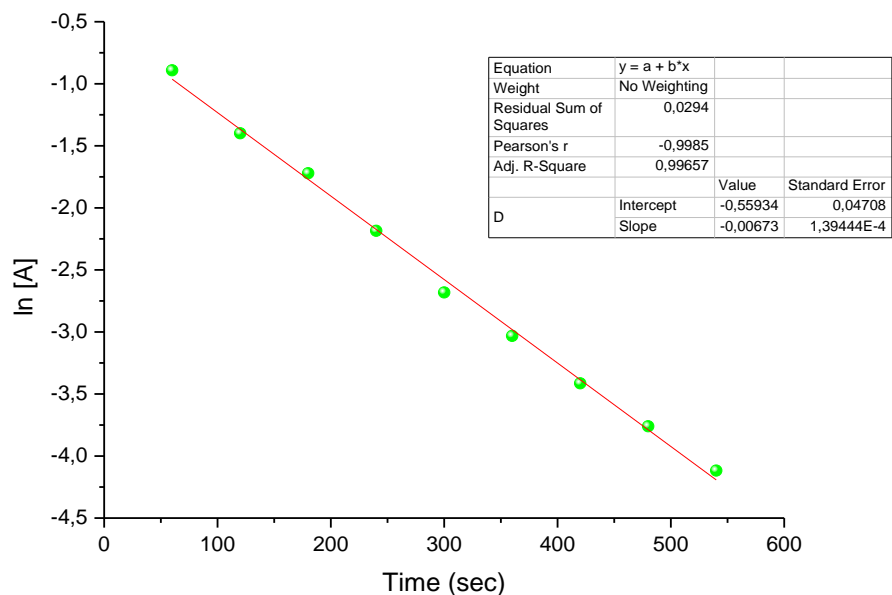

Figure S14. Logarithmic dependence of changes in the concentration of 1,3-diphenylpyrazole, the product of the isomerization reaction at 480 °C.

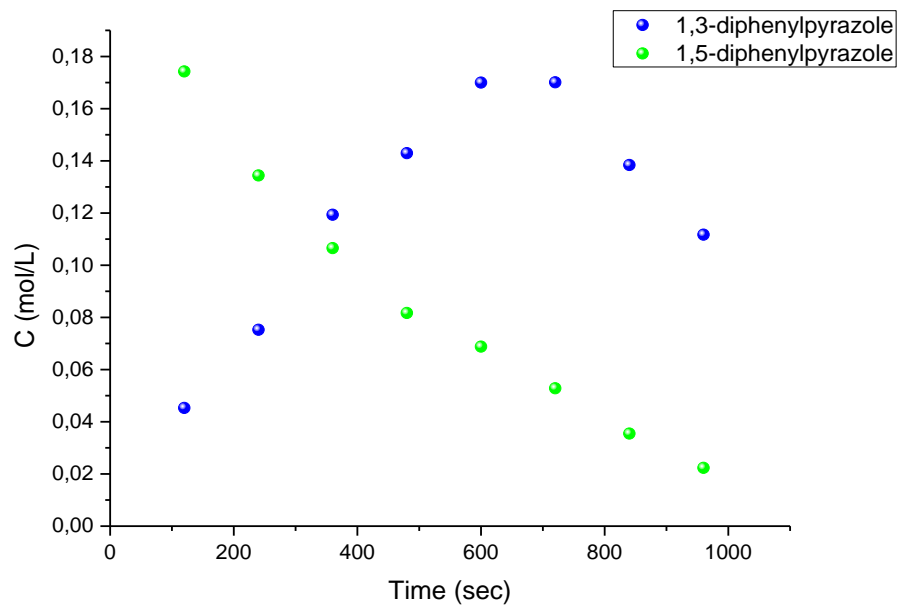

Figure S15. Kinetic curves of changes in the concentration of 1,3-diphenylpyrazole and 1,5-diphenylpyrazole at 460 °C.

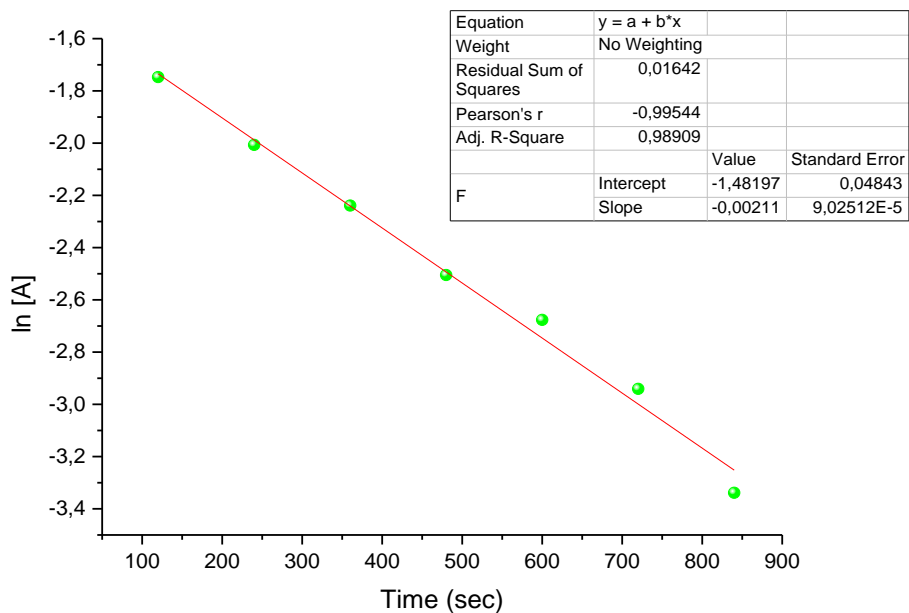

Figure S16. Logarithmic dependence of changes in the concentration of 1,3-diphenylpyrazole, the product of the isomerization reaction at 460 °C.

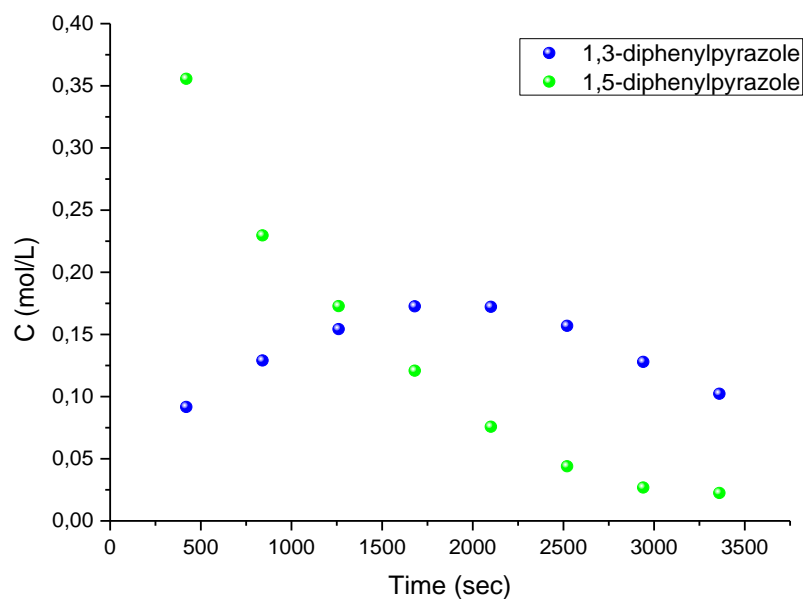

Figure S17. Kinetic curves of changes in the concentration of 1,3-diphenylpyrazole and 1,5-diphenylpyrazole at 440 °C.

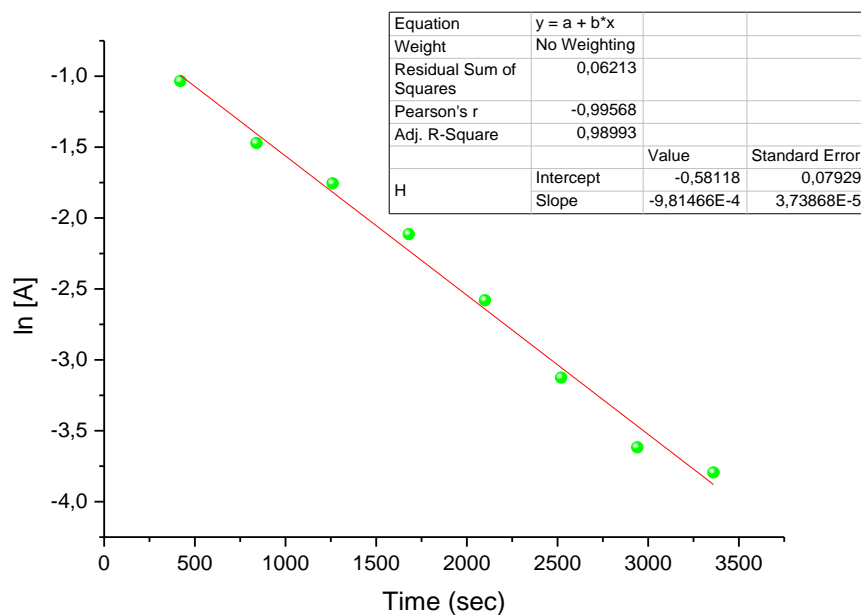

Figure S18. Logarithmic dependence of changes in the concentration of 1,3-diphenylpyrazole, the product of the isomerization reaction at 440 °C.

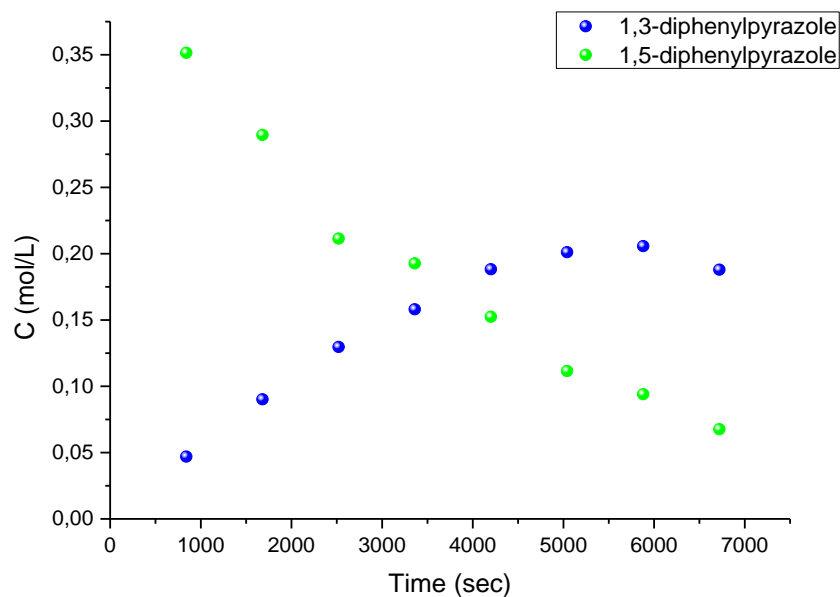

Figure S19. Kinetic curves of changes in the concentration of 1,3-diphenylpyrazole and 1,5-diphenylpyrazole at 420 °C.

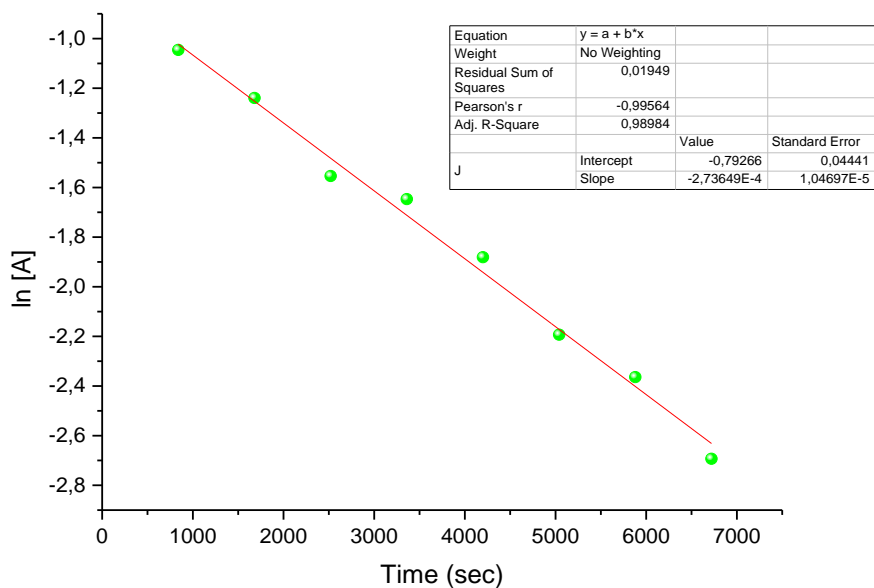

Figure S20. Logarithmic dependence of changes in the concentration of 1,3-diphenylpyrazole, the product of the isomerization reaction at 420 °C.

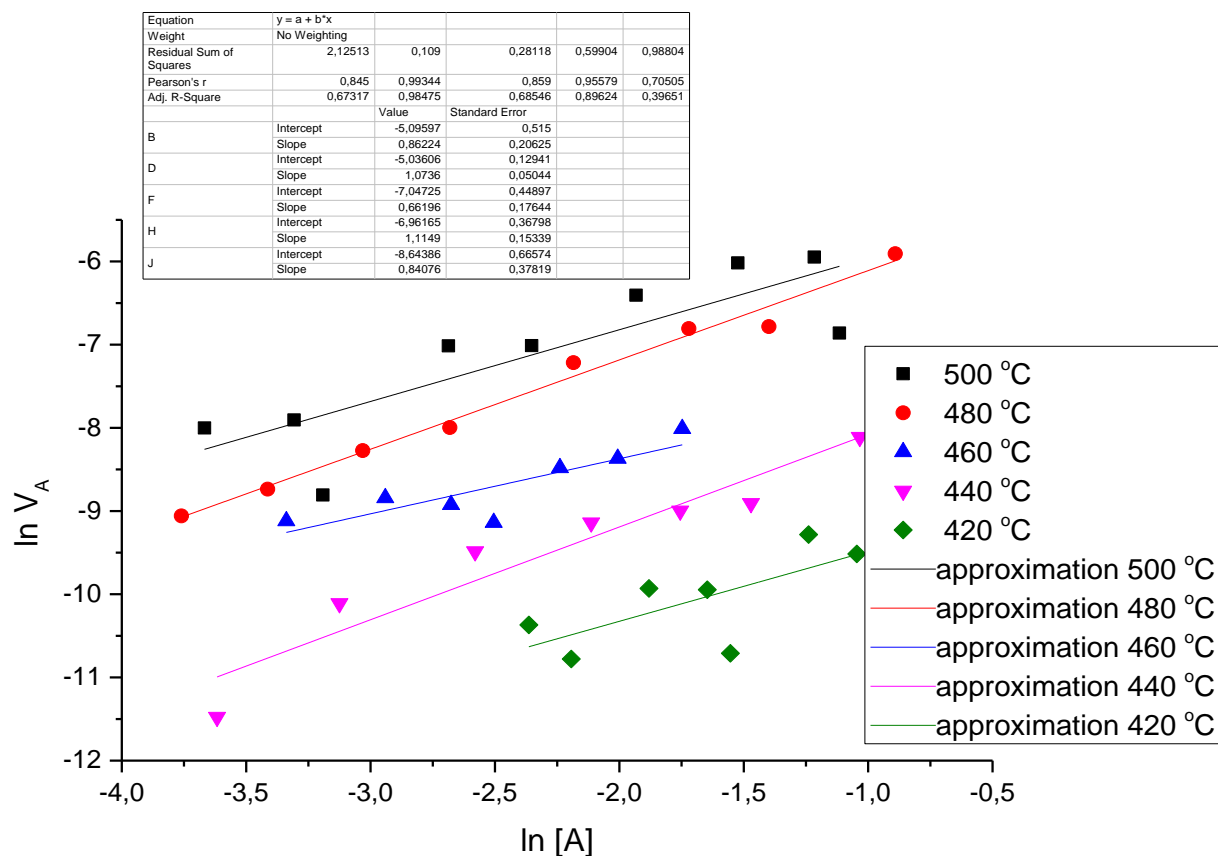

Figure S21. Calculation of the reaction order for 1,3-diphenylpyrazole.

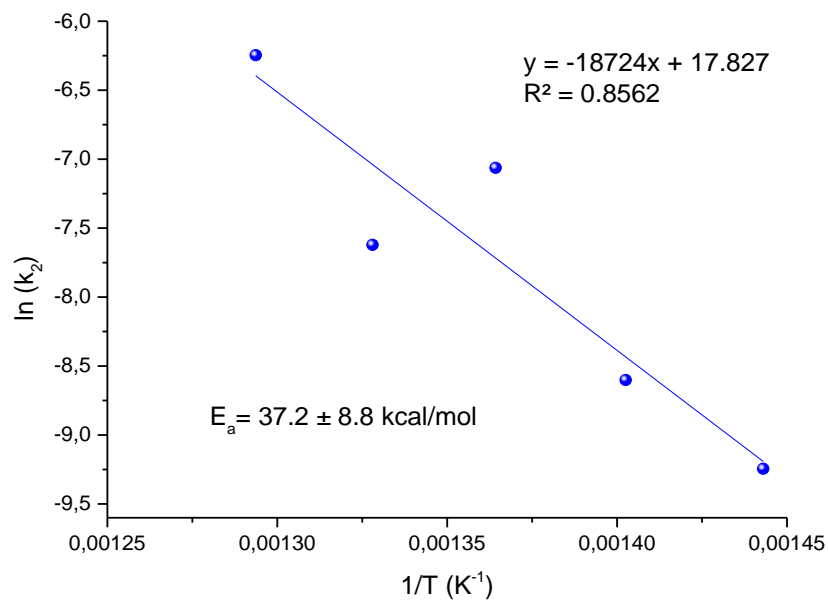

Figure S22. The activation energy of the degradation of 1,3-diphenylpyrazole was calculated on the basis of the change in the concentration of the isomerization reaction product.

## Mechanistic study

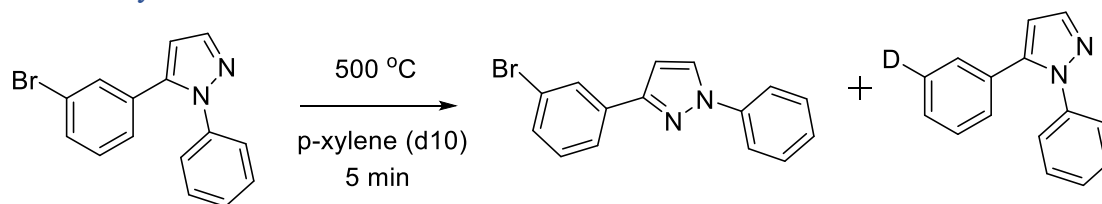

Scheme S2. The behavior of the reaction mixture in a deuterated solvent was studied.

The reaction was carried out in *p*-xylene-*d*<sub>10</sub>. After 5 min of reaction, the reaction mixture was analyzed via ESI-HRMS. MS detected the formation of deuterated compounds, but nondeuterated 1,5-diphenylpyrazole was not detected.

Experimental peak  $[M]^+ = 221.1061$  Da, calculated for  $C_{15}H_{11}N_2D = 221.1058$ ,  $\Delta = 1.36$  ppm.

Experimental peak  $[M]^+ = 222.1113$  Da, calculated for  $C_{15}H_{10}N_2D_2 = 222.1121$ ,  $\Delta = 3.60$  ppm.

Experimental peak  $[M]^+ = 223.1178$  Da, calculated for  $C_{15}H_9N_2D_3 = 223.1183$ ,  $\Delta = 1.79$  ppm.

Experimental peak  $[M]^+ = 224.1239$  Da, calculated for  $C_{15}H_8N_2D_4 = 224.1246$ ,  $\Delta = 3.12$  ppm.

Experimental peak  $[M]^+ = 225.1303$  Da, calculated for  $C_{15}H_7N_2D_5 = 225.1309$ ,  $\Delta = 2.67$  ppm.

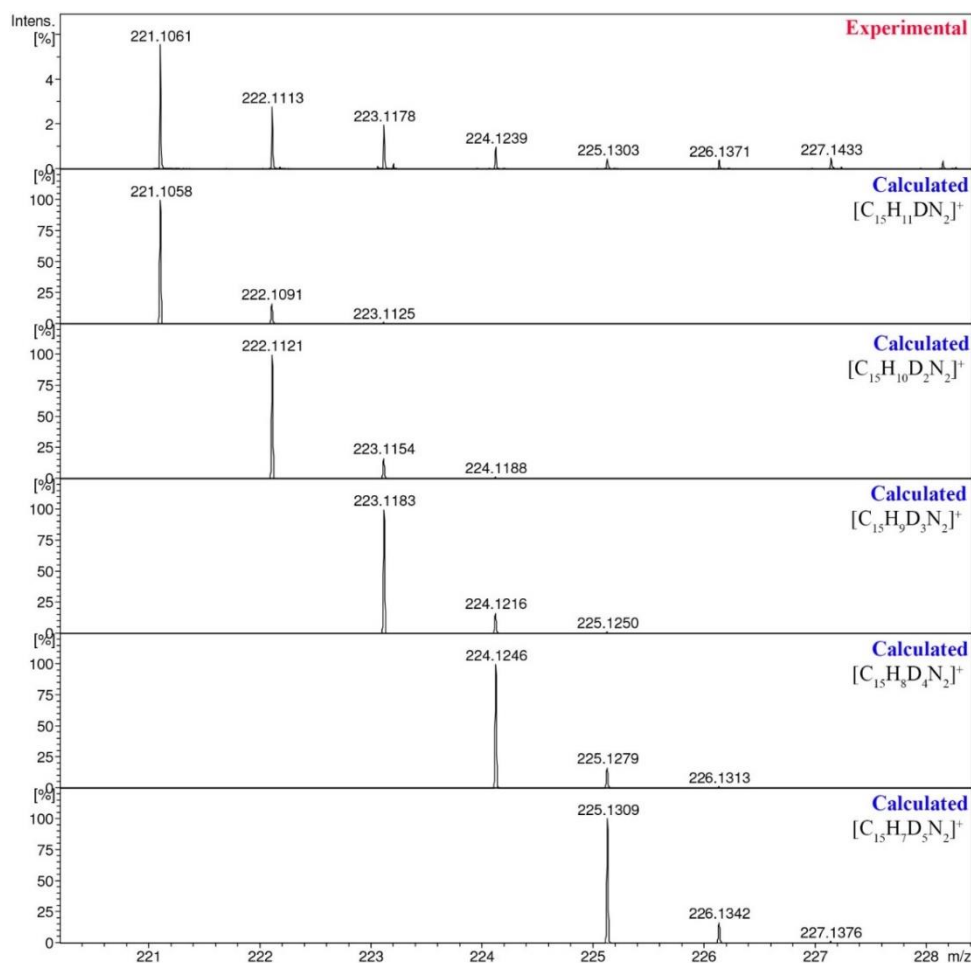

Figure S23. Experimental and theoretical ESI-(+) HRMS spectra of 1,5-diphenylpyrazole in a *p*-xylene *d*<sub>10</sub> solution.

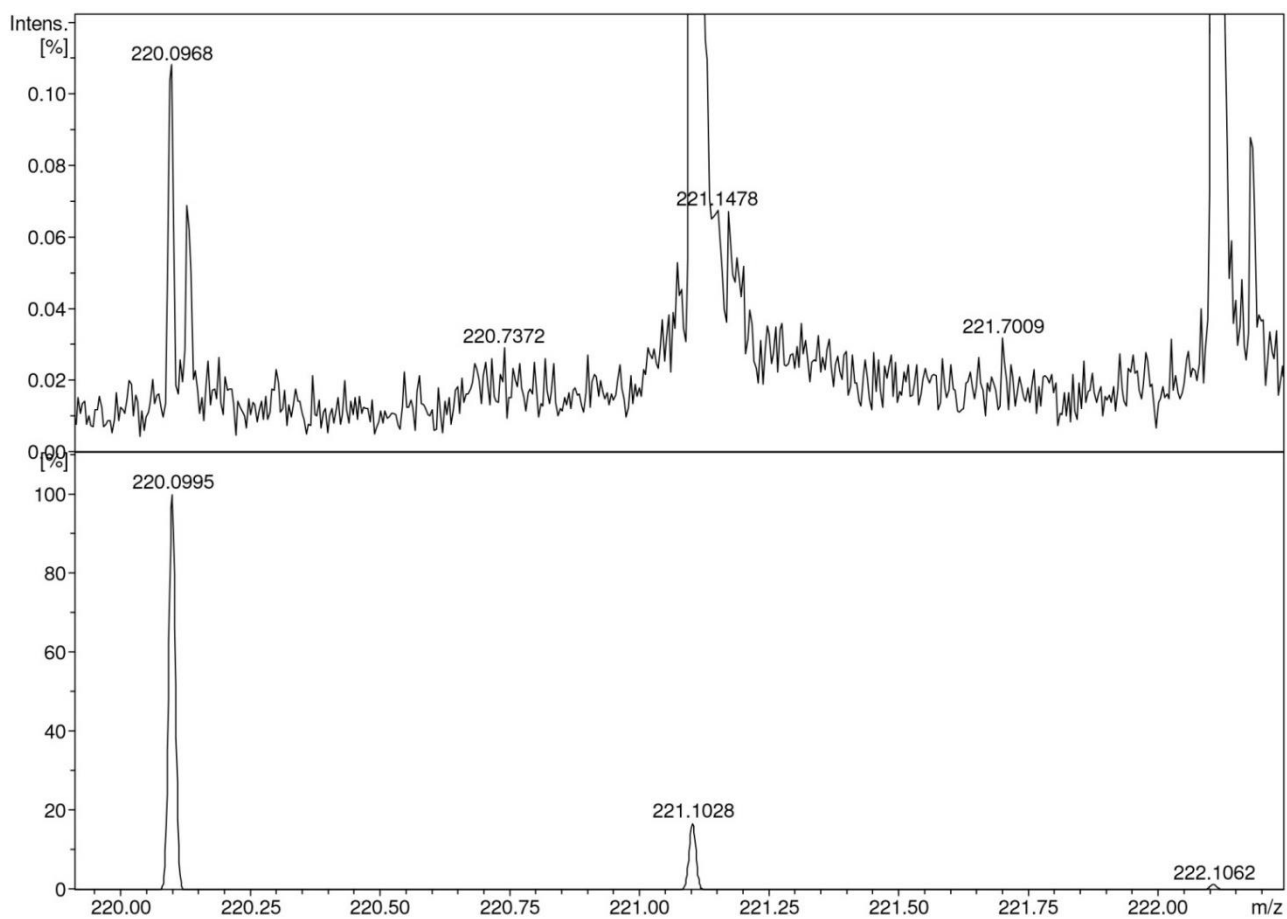

Figure S24. ESI-HRMS The absence of deuterated 1,5-diphenyl pyrazole is shown. Experimental peak  $[M]^+ = 220.0968$  Da, calculated for  $C_{15}H_{11}N_2D = 220.0995$ ,  $\Delta = 12.27$  ppm.

## Preparation of pyrazoles and isomerization reactions

### **Synthesis of enaminones. General procedure:**

DMFDA (6.5 mmol) was added to a solution of acetophenone (5 mmol) in dry toluene (4 mL) under argon. The reaction mixture was heated to 110 °C until TLC was complete (2 days). After cooling, the solvent was evaporated under reduced pressure, and the resulting residue was purified via crystallization.<sup>15</sup>

### **Synthesis of pyrazoles (1a, 2a, 3a). General procedure:**

Hydrazine hydrochloride (1 mmol) was added to a mixture of enaminoketone (0.9 mmol) and Na<sub>2</sub>CO<sub>3</sub> (0.6 mmol) in MeOH (10 mL) and H<sub>2</sub>O (2 mL) under stirring at room temperature. The resulting mixture was acidified with glacial acetic acid to pH 4 and heated to 135 °C for 2 hours. After cooling, the suspension was diluted with EtOAc (30 mL), the organic layer was washed with H<sub>2</sub>O (3 × 10 mL), and the solvent was evaporated under reduced pressure. The resulting residue was purified via chromatography on a silica gel with EtOAc/hexane as the eluent.<sup>16,17</sup>

### **Synthesis of isomerization pyrazoles (1b, 2b, 3b, 4b, 5b, 6b). General procedure:**

Isomerization was carried out according to a previously described procedure (HTCS). The capillary with the substance in the p-xylene solution was sealed on both sides. The reaction was carried out at 500 °C for 5 minutes. After cooling, the capillaries broke. The suspension was diluted with EtOAc (30 mL), the organic layer was washed with H<sub>2</sub>O (3 × 10 mL), and the solvent was evaporated under reduced pressure. The resulting residue was purified via chromatography on a silica gel with EtOAc/hexane as the eluent.



## Product characterization:

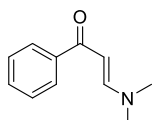

### *precursor 1a: (2E)-3-(Dimethylamino)-1-phenyl-2-propen-1-one*

Yield 647 mg (74%); yellow solid; chromatography after crystallization with Et<sub>2</sub>O. (EtOAc/Hexanes = 1:10). <sup>1</sup>H NMR (300 MHz, CDCl<sub>3</sub>, ppm) δ 7.90 - 7.86 (m, 2H), 7.83 - 7.79 (d, 1H, J = 12.3 Hz), 7.44 - 7.37 (m, 3H), 5.72 - 5.68 (d, 1H, J = 12.4 Hz), 3.09 (s, 3H), 2.92 (s, 3H). <sup>13</sup>C {<sup>1</sup>H} NMR (75 MHz, CDCl<sub>3</sub>, ppm) δ 188.6, 154.4, 140.5, 131.0, 128.2 (2C), 127.6 (2C), 92.3. ESI-(+) HRMS: *m/z* calcd for C<sub>11</sub>H<sub>13</sub>NO [M+H]<sup>+</sup>, 176.1070; found 176.1062 (Δ = 4.54 ppm).

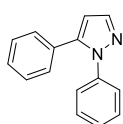

### *1a: 1,5-Diphenyl-1H-pyrazole*

Yield 160 mg (81%); yellow solid; chromatography (EtOAc/hexanes = 1:10). <sup>1</sup>H NMR (300 MHz, CDCl<sub>3</sub>, ppm) δ 7.75 - 7.75 (d, 1H, J = 1.4 Hz), 7.36 - 7.23 (m, 10H), 6.54 - 6.53 (d, 1H, J = 1.4 Hz). <sup>13</sup>C {<sup>1</sup>H} NMR (75 MHz, CDCl<sub>3</sub>, ppm) δ 143.2, 140.4, 140.2, 130.7, 129.0 (2C), 128.9 (2C), 128.6 (2C), 128.4, 127.6, 125.4 (2C), 108.0. ESI-(+) HRMS: *m/z* calcd for C<sub>15</sub>H<sub>12</sub>N<sub>2</sub> [M+H]<sup>+</sup>, 221.1073; found 221.1076 (Δ = 1.35 ppm).

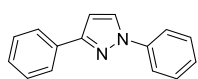

### *1b: 1,3-Diphenyl-1H-pyrazole*

Yield 31.1 mg (50%); yellow solid; chromatography (EtOAc/hexanes = 1:10). <sup>1</sup>H NMR (300 MHz, CDCl<sub>3</sub>, ppm) δ 7.97 - 7.96 (d, 1H, J = 2.5 Hz), 7.94 - 7.90 (m, 2H), 7.80 - 7.76 (m, 2H), 7.51 - 7.40 (m, 4H), 7.37 - 7.26 (m, 2H), 6.79 - 6.78 (d, 1H, J = 2.5 Hz). <sup>13</sup>C {<sup>1</sup>H} NMR (75 MHz, CDCl<sub>3</sub>, ppm) δ 153.1, 140.4, 133.3, 129.6, 128.8 (2C), 128.2 (2C), 128.1, 126.5, 126.0 (2C), 119.2 (2C), 105.2. ESI-(+) HRMS: *m/z* calcd for C<sub>15</sub>H<sub>12</sub>N<sub>2</sub> [M+H]<sup>+</sup>, 221.1073; found 221.1065 (Δ = 3.62 ppm).

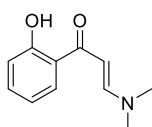

### *Precursor 2a: (2E)-3-(Dimethylamino)-1-(2-hydroxyphenyl)-2-propen-1-one*

Yield 620 mg (65%); white solid; after crystallization, Et<sub>2</sub>O. <sup>1</sup>H NMR (300 MHz, CDCl<sub>3</sub>, ppm) δ 7.91 (s, 1H), 7.71 - 7.67 (dd, 1H, J = 8.0 Hz, J = 1.6 Hz), 7.38 - 7.32 (td, 1H, J = 7.8 Hz, J = 1.6 Hz), 6.95 - 6.92 (dd, 1H, J = 8.4 Hz, J = 8.4 Hz, J = 0.8 Hz), 6.86 - 6.81 (td, 1H, J = 7.5 Hz, J = 1.1 Hz), 5.81 (s, 1H), 3.10 (s, 6H). <sup>13</sup>C {<sup>1</sup>H} NMR (75 MHz, CDCl<sub>3</sub>, ppm) δ 191.7, 163.1, 154.9, 134.1, 128.4, 120.5, 118.4, 118.1, 90.3, 45.5, 37.6. ESI-(+) HRMS: *m/z* calcd for C<sub>11</sub>H<sub>13</sub>NO<sub>2</sub> [M+H]<sup>+</sup>, 192.1019; found 192.1024 (Δ = 2.60 ppm).

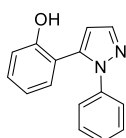

### *2a: 2-(1-Phenyl-1H-pyrazol-5-yl)phenol*

Yield 155 mg (73%); chromatography (EtOAc/hexanes = 1:10). <sup>1</sup>H NMR (300 MHz, DMSO-*d*<sub>6</sub>, ppm) δ 9.56 (s, 1H), 7.72 - 7.71 (d, 1H, J = 1.7 Hz), 7.71 - 7.17 (m, 6H), 7.11 - 7.08 (dd, 1H, J = 7.7 Hz, J = 1.6 Hz), 6.82 - 6.77 (m, 2H), 6.47 - 6.46 (d, 1H, J = 1.8 Hz). <sup>13</sup>C {<sup>1</sup>H} NMR (75 MHz, DMSO-*d*<sub>6</sub>, ppm) δ 154.9, 140.7, 139.7, 139.7, 131.0, 130.2, 128.6 (2C), 126.7, 123.2 (2C), 118.9, 118.8, 115.7, 108.8. ESI-(+) HRMS: *m/z* calcd for C<sub>15</sub>H<sub>12</sub>N<sub>2</sub>O [M+H]<sup>+</sup>, 237.1022; found 237.1024 (Δ = 0.84 ppm).

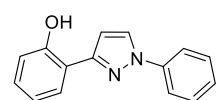

### *2b: 3-(1-Phenyl-1H-pyrazol-2-yl)phenol*

Yield 5.6 mg (34%); white solid; chromatography (EtOAc/hexanes = 1:10). <sup>1</sup>H NMR (300 MHz, CDCl<sub>3</sub>, ppm) δ 10.80 (s, 1H), 7.99 - 7.98 (d, 1H, J = 2.7 Hz), 7.71 - 7.67 (m, 2H), 7.64 - 7.61 (dd, 1H, J = 7.7 Hz, J = 1.6 Hz), 7.53 - 7.47 (t, 2H, J = 8.3 Hz), 7.36 - 7.23 (m, 2H), 7.10 - 7.05 (d, 1H, J = 8.3 Hz), 6.97 - 6.92 (t, 1H, J = 7.4 Hz), 6.87 - 6.86 (d, 1H, J = 2.7 Hz). <sup>13</sup>C {<sup>1</sup>H} NMR (75 MHz, CDCl<sub>3</sub>, ppm) δ 156.2, 153.1, 139.4, 129.8, 129.8 (2C), 127.9, 127.0, 126.7, 119.5, 119.0 (2C), 117.3, 116.4, 104.70. ESI-(+) HRMS: *m/z* calcd for C<sub>15</sub>H<sub>12</sub>N<sub>2</sub>O [M+H]<sup>+</sup>, 237.1022; found 237.1023 (Δ = 0.42 ppm).

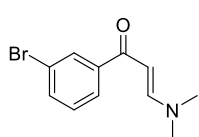

**Precursor 3a:** (2E)-1-(3-bromophenyl)-3-(dimethylamino)-2-propen-1-one

Yield 873 mg (69%); brown solid; after crystallization, Et<sub>2</sub>O. <sup>1</sup>H NMR (300 MHz, CDCl<sub>3</sub>, ppm) δ 8.01 (t, 1H, J = 1.7 Hz), 7.87 - 7.79 (m, 2H), 7.58 - 7.55 (ddd, 1H, J = 8.1 Hz, J = 0.9 Hz, J = 0.8 Hz), 7.30 - 7.25 (t, 1H, J = 7.8 Hz), 5.62 (d, 2H, J = 12.3 Hz), 3.16 (s, 3H), 2.95 (s, 3H). <sup>13</sup>C {<sup>1</sup>H} NMR (75 MHz, CDCl<sub>3</sub>, ppm) δ 186.9, 154.8, 142.7, 133.8, 130.7, 129.9, 126.2, 122.6, 91.9, 45.2, 37.5. ESI-(+) HRMS: *m/z* calcd for C<sub>11</sub>H<sub>12</sub>NOBr [M+H]<sup>+</sup>, 254.0175; found 254.0180 (Δ = 1.97 ppm).

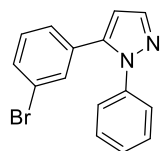

**3a:** 5-(3-bromophenyl)-1-phenyl-1H-pyrazole

Yield 193 mg (72%); yellow oil; chromatography (EtOAc/hexanes = 1:10). <sup>1</sup>H NMR (300 MHz, DMSO-*d*<sub>6</sub>, ppm) δ 7.79 - 7.78 (d, 1H, J = 1.8 Hz), 7.56 - 7.53 (ddd, 1H, J = 8.0 Hz, J = 3.0 Hz, J = 1.0 Hz), 7.48 - 7.37 (m, 4H), 7.34 - 7.27 (3H), 7.19 - 7.16 (m, 1H), 6.76 - 6.75 (d, 1H, J = 1.8 Hz). <sup>13</sup>C {<sup>1</sup>H} NMR (75 MHz, DMSO-*d*<sub>6</sub>, ppm) δ 140.8, 140.3, 139.5, 132.3, 131.0, 130.8, 130.6, 129.1 (2C), 127.9, 127.4, 125.3 (2C), 121.7, 108.4. ESI-(+) HRMS: *m/z* calcd for C<sub>15</sub>H<sub>11</sub>N<sub>2</sub>Br [M+H]<sup>+</sup>, 299.0178; found 299.0175 (Δ = 1.00 ppm).

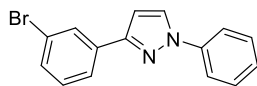

**3b:** 3-(3-bromophenyl)-1-phenyl-1H-pyrazole

Yield 6.5 mg (31%); brown oil; chromatography (EtOAc/hexanes = 1:10). <sup>1</sup>H NMR (300 MHz, DMSO-*d*<sub>6</sub>, ppm) δ 8.61 - 8.60 (d, 1H, J = 2.6 Hz), 8.14 - 8.13 (t, 1H, J = 1.6 Hz), 7.97, - 7.92 (m, 3H), 7.58 - 7.51 (m, 3H), 7.46 - 7.41 (t, 1H, J = 7.9 Hz), 7.37 - 7.32 (t, 1H, J = 7.3 Hz), 7.15 - 7.14 (d, 1H, J = 2.6 Hz). <sup>13</sup>C {<sup>1</sup>H} NMR (75 MHz, DMSO-*d*<sub>6</sub>, ppm) δ 150.3, 139.5, 135.5, 131.0, 130.7 (2C), 129.7, 129.6, 127.8, 126.4, 124.4, 122.2, 118.4 (2C), 105.8. ESI-(+) HRMS: *m/z* calcd for C<sub>15</sub>H<sub>11</sub>N<sub>2</sub>Br [M+H]<sup>+</sup>, 299.0178; found 299.0187 (Δ = 3.00 ppm).

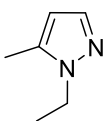

**4a:** 1-Ethyl-5-methyl-1H-pyrazole

<sup>1</sup>H NMR (300 MHz, CDCl<sub>3</sub>) δ 7.44 (d, 1H, J = 1.7 Hz), 6.05 (m, 1H), 4.20 - 4.12 (q, 2H, J = 14.6 Hz), 2.31 (s, 1H), 1.46 - 1.41 (t, 3H, J = 7.3 Hz). <sup>13</sup>C {<sup>1</sup>H} NMR (75 MHz, CDCl<sub>3</sub>) δ 138.2, 137.3, 105.2, 43.8, 15.4, 11.0. ESI-(+) HRMS: *m/z* calcd for C<sub>6</sub>H<sub>10</sub>N<sub>2</sub> [M+H]<sup>+</sup>, 111.0917; found 111.0920 (Δ = 2.70 ppm).

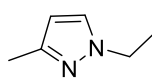

**4b:** 1-Ethyl-3-methyl-1H-pyrazole

Yield 1.2 mg (15%); brown oil; chromatography (EtOAc/hexanes = 1:10). <sup>1</sup>H NMR (300 MHz, CDCl<sub>3</sub>) δ 7.29 - 7.28 (d, 2H, J = 2.2 Hz), 6.02 (d, 2H, J = 2.2 Hz), 4.17 - 4.09 (q, 2H, J = 14.7 Hz), 2.30 (s, 3H), 1.49 - 1.45 (t, 3H, J = 7.3 Hz). <sup>13</sup>C {<sup>1</sup>H} NMR (75 MHz, CDCl<sub>3</sub>) δ 148.3, 128.9, 104.8, 46.6, 15.7, 13.6. ESI-(+) HRMS: *m/z* calcd for C<sub>6</sub>H<sub>10</sub>N<sub>2</sub> [M+H]<sup>+</sup>, 111.0917; found 111.0922 (Δ = 4.50 ppm).

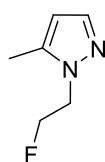

**5a:** 1-(2-Fluoroethyl)-5-methyl-1H-pyrazole

<sup>1</sup>H NMR (300 MHz, CDCl<sub>3</sub>) δ 7.43 (d, 1H, J = 1.5 Hz), 6.02 - 6.01 (m, 1H), 4.86 - 4.67 (d, 2H, J = 4.8 Hz), 4.39 - 4.27 (d, 2H, J = 4.8 Hz), 2.31 (s, 3H). <sup>13</sup>C {<sup>1</sup>H} NMR (75 MHz, CDCl<sub>3</sub>) δ 139.3, 139.2, 105.5, 83.6, 81.3, 49.3, 49.0, 10.97, 11.0. ESI-(+) HRMS: *m/z* calcd for C<sub>6</sub>H<sub>6</sub>FN<sub>2</sub> [M+H]<sup>+</sup>, 129.0823; found 129.0827 (Δ = 3.10 ppm).

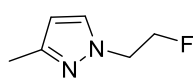

**5b:** 1-(2-Fluoroethyl)-3-methyl-1H-pyrazole

Yield 1.62 mg (7%); brown oil; chromatography (EtOAc/hexanes = 1:10). <sup>1</sup>H NMR (300 MHz, CDCl<sub>3</sub>) δ 7.35 (d, 2H, J = 2.2 Hz), 6.05 - 6.04 (d, 2H, J = 2.2 Hz), 4.82 - 4.63 (d,

2H, J = 4.7 Hz), 4.39 - 2.28 (d, 2H, J = 4.7 Hz), 1.63 (s, 3H).  $^{13}\text{C}$  { $^1\text{H}$ } NMR (75 MHz,  $\text{CDCl}_3$ )  $\delta$  149.4, 131.0, 105.6, 83.3, 81.0, 52.4, 52.1, 13.7. ESI-(+) HRMS:  $m/z$  calcd for  $\text{C}_6\text{H}_6\text{FN}_2$   $[\text{M}+\text{H}]^+$ , 129.0823; found 129.0819 ( $\Delta = 3.10$  ppm).

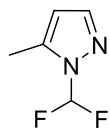

**6a:** 1-(Difluoromethyl)-5-methyl-1H-pyrazole

$^1\text{H}$  NMR (300 MHz,  $\text{CDCl}_3$ )  $\delta$  7.49 (d, 1H, J = 1.1 Hz), 7.48 - 7.02 (t, 1H, J = 59.5 Hz), 6.15 (s, 1H), 2.48 - 2.47 (m, 2H).  $^{13}\text{C}$  { $^1\text{H}$ } NMR (75 MHz,  $\text{CDCl}_3$ )  $\delta$  141.4, 139.3, 115.9, 112.6, 109.3, 109.2, 10.8. ESI-(+) HRMS:  $m/z$  calcd for  $\text{C}_5\text{H}_6\text{F}_2\text{N}_2$   $[\text{M}+\text{H}]^+$ , 133.0572; found 133.0568 ( $\Delta = 3.01$  ppm).

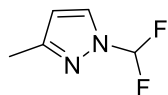

**6b:** 1-(Difluoromethyl)-3-methyl-1H-pyrazole

Yield 1.56 mg (6%); brown oil; chromatography (EtOAc/hexanes = 1:10).  $^1\text{H}$  NMR (300 MHz,  $\text{CDCl}_3$ )  $\delta$  7.70 - 7.69 (d, 1H, J = 2.6 Hz), 7.31 - 6.91 (t, 1H, J = 61.0 Hz), 6.24 - 6.23 (d, 1H, J = 2.6 Hz), 2.31 (s, 3H).  $^{13}\text{C}$  { $^1\text{H}$ } NMR (75 MHz)  $\delta$  151.6, 127.3, 114.1, 110.8, 108.9, 107.5, 13.6. ESI-(+) HRMS:  $m/z$  calcd for  $\text{C}_5\text{H}_6\text{F}_2\text{N}_2$   $[\text{M}+\text{H}]^+$ , 133.0572; found 133.0578 ( $\Delta = 4.51$  ppm).

$^1\text{H}$  NMR,  $^{13}\text{C}$  NMR spectra and HRMS

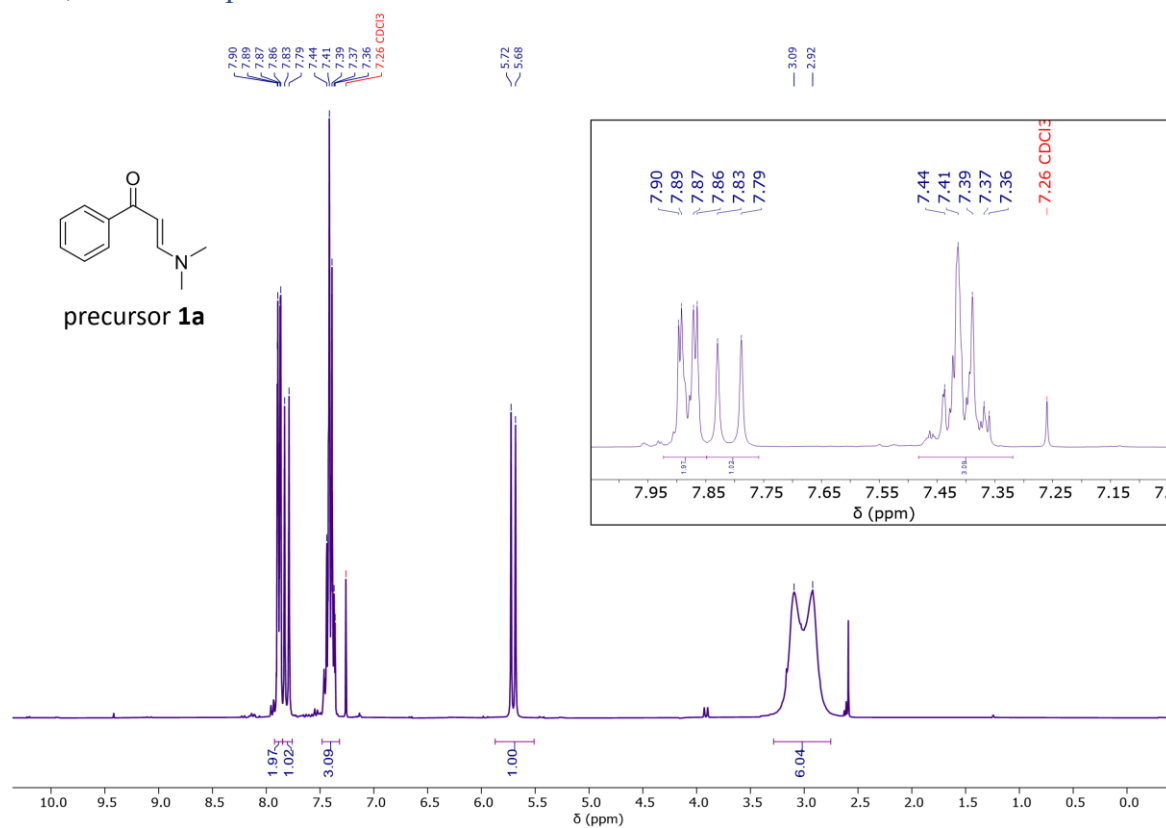

Figure S25.  $^1\text{H}$  NMR spectrum of compound  $(2E)$ -3-(Dimethylamino)-1-phenyl-2-propen-1-one.

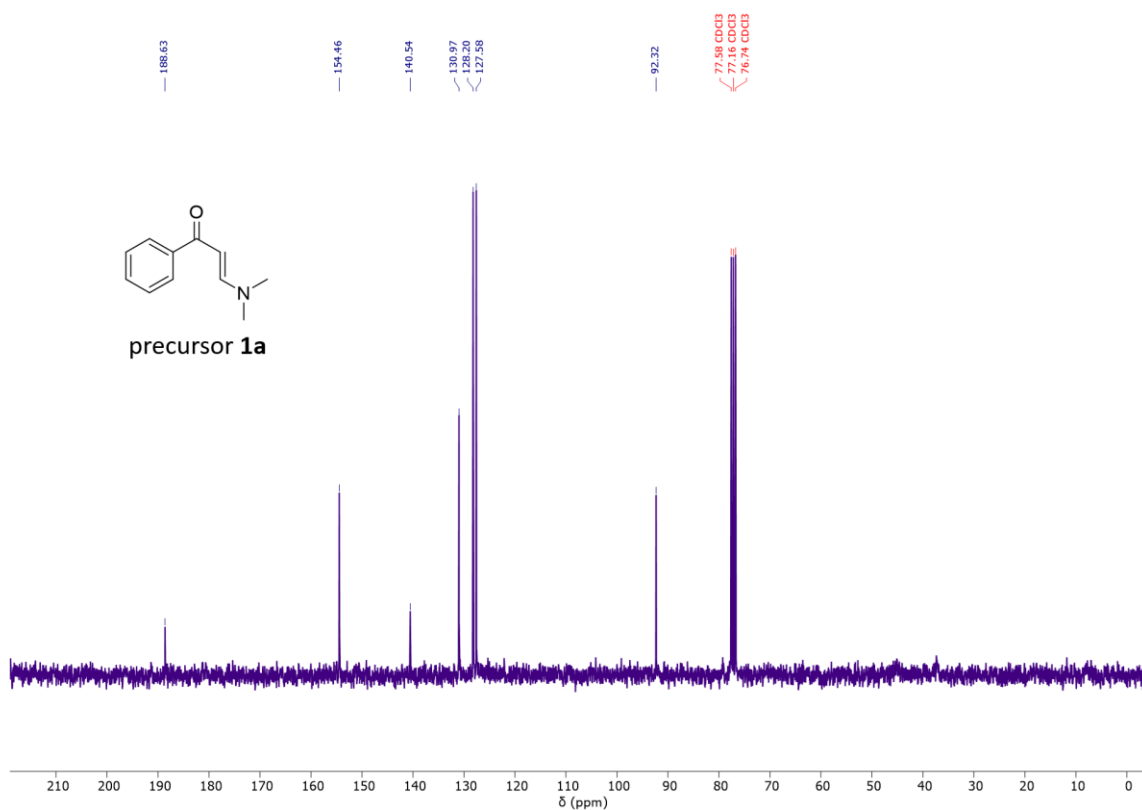

Figure S26.  $^{13}\text{C}$   $\{^1\text{H}\}$  NMR spectrum of compound  $(2E)$ -3-(Dimethylamino)-1-phenyl-2-propen-1-one.

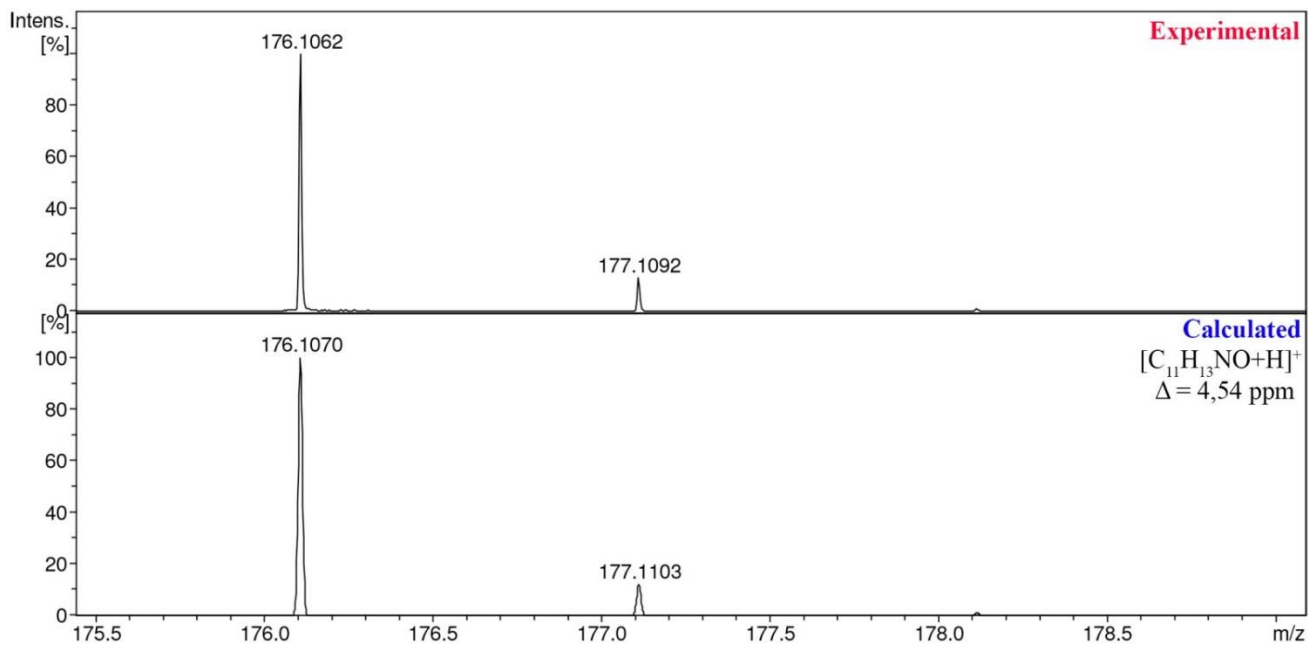

Figure S27. ESI-HRMS of compound (2E)-3-(Dimethylamino)-1-phenyl-2-propen-1-one.

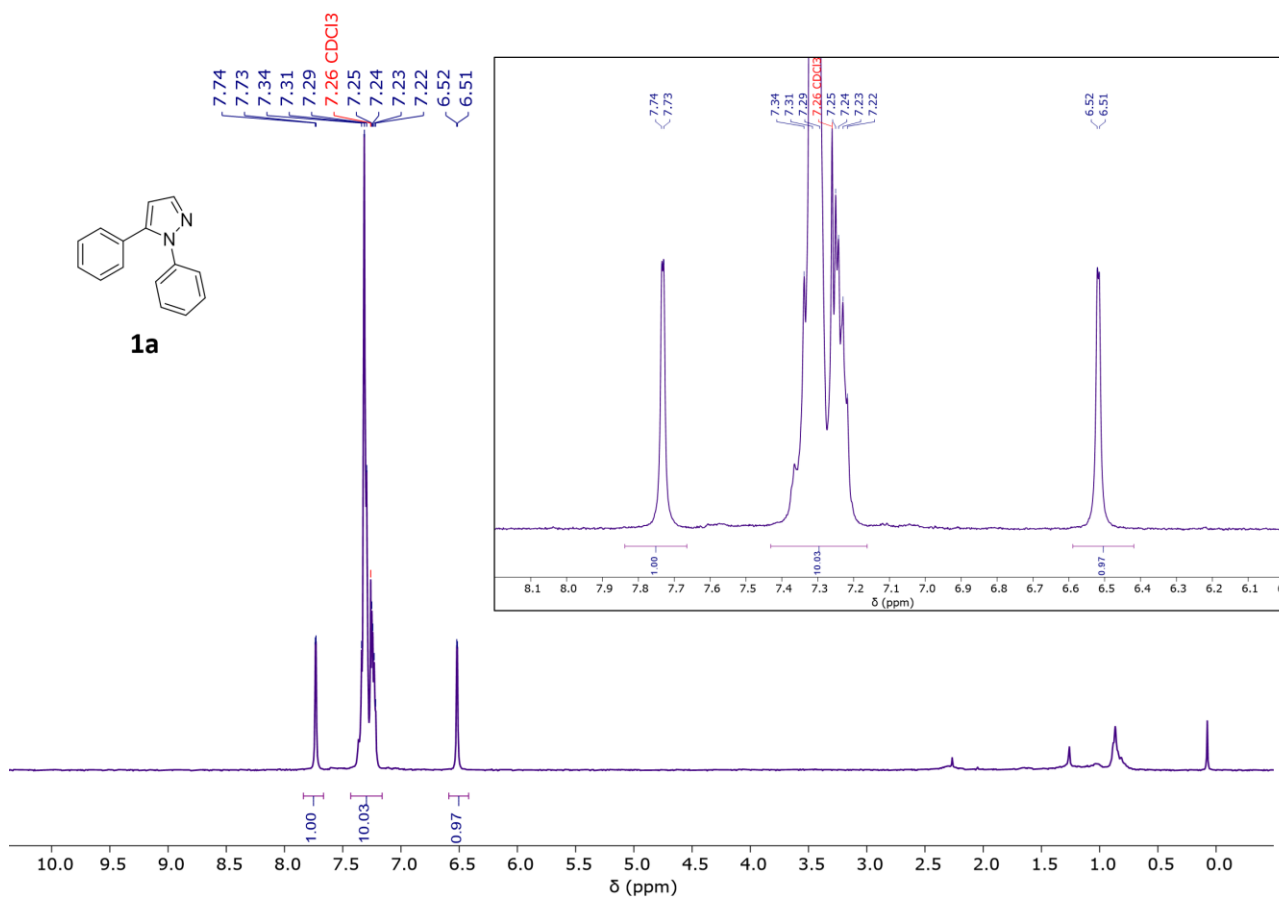

Figure S28. <sup>1</sup>H NMR spectrum of compound 1,5-Diphenyl-1H-pyrazole.

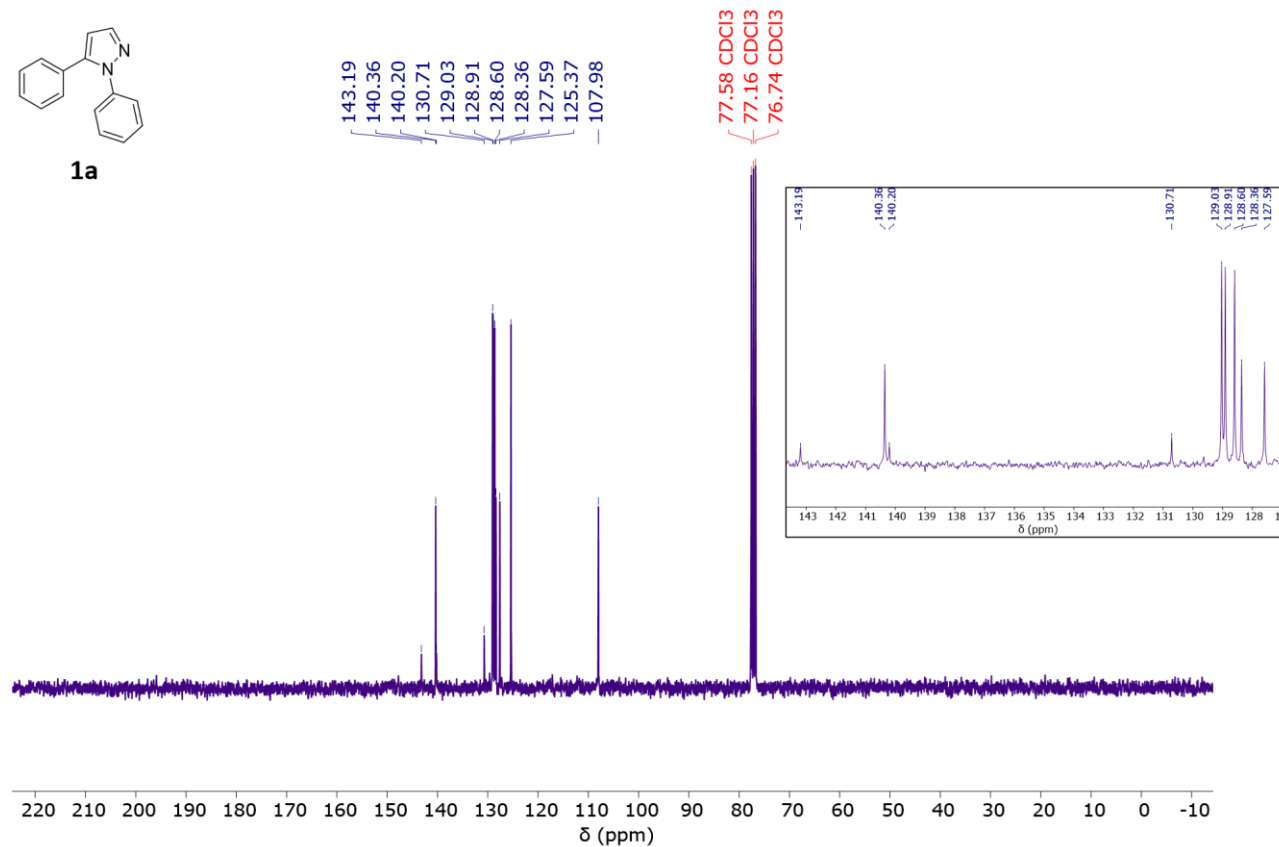

Figure S29. <sup>13</sup>C {<sup>1</sup>H} NMR spectrum of compound 1,5-Diphenyl-1H-pyrazole.

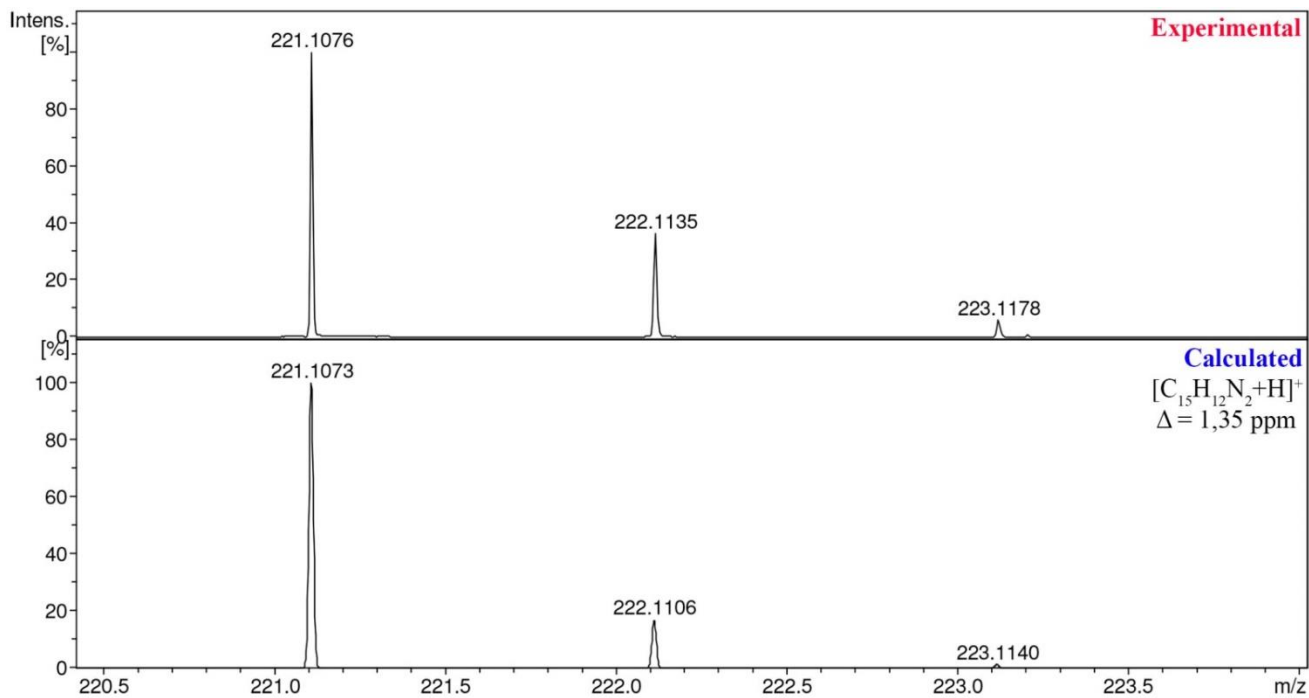

Figure S30. ESI-HRMS of compound 1,5-Diphenyl-1H-pyrazole.

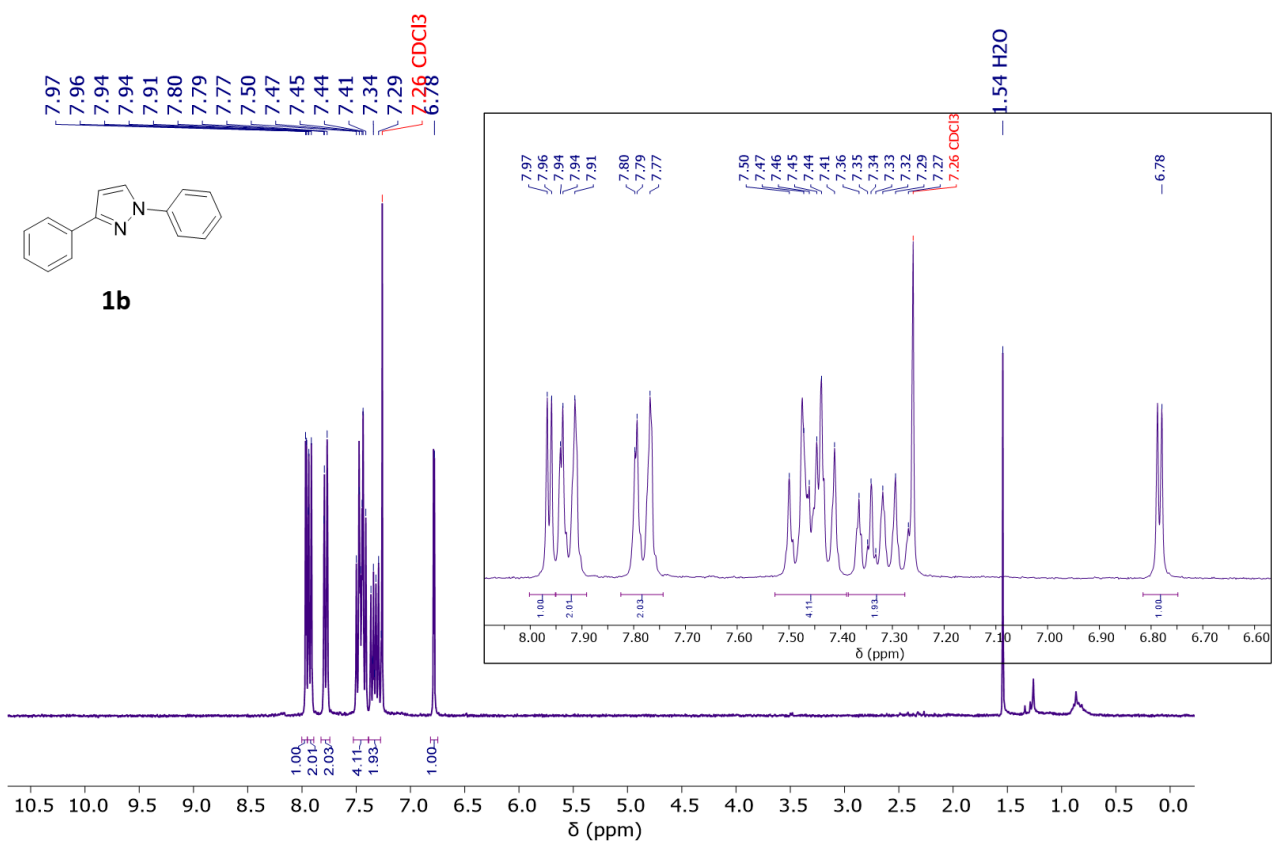

Figure S31.  $^1\text{H}$  NMR spectrum of compound 1,3-Diphenyl-1H-pyrazole.

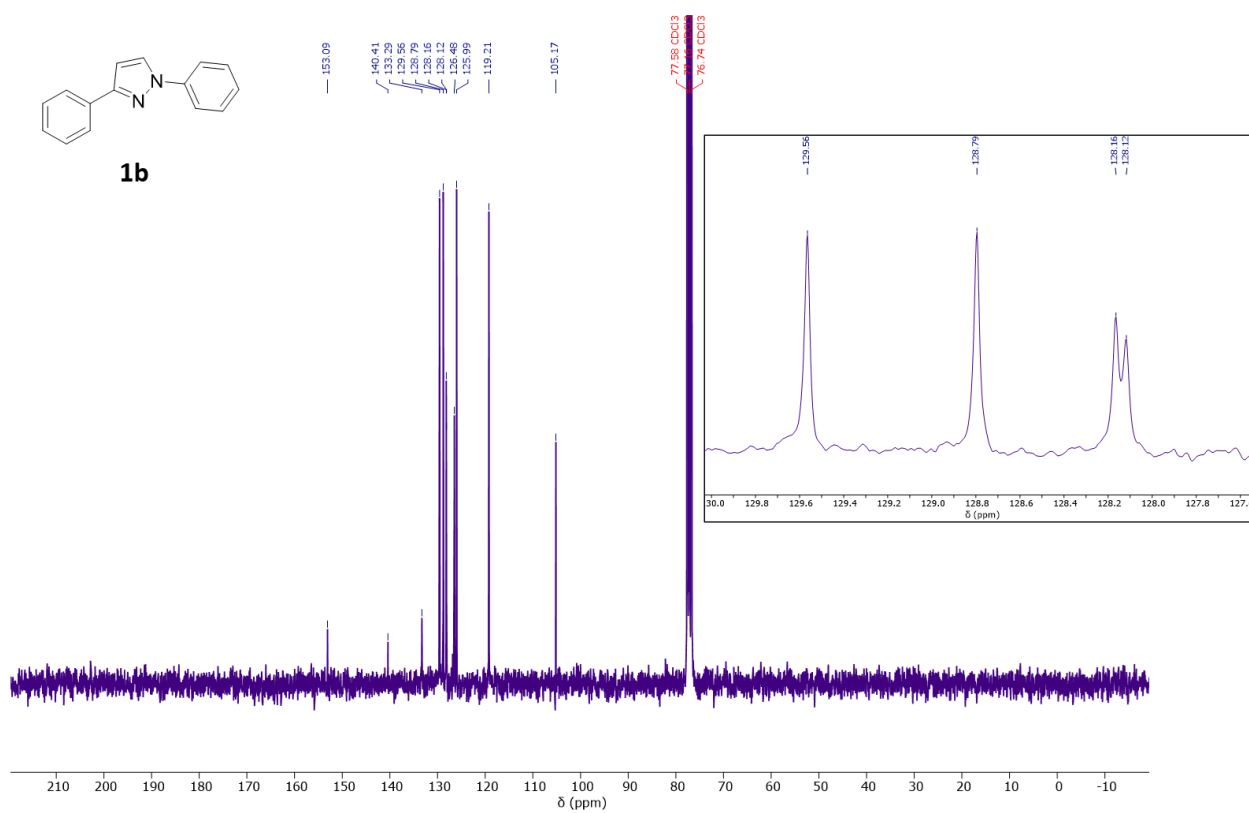

Figure S32.  $^{13}\text{C}$   $\{^1\text{H}\}$  NMR spectrum of compound 1,3-Diphenyl-1H-pyrazole.



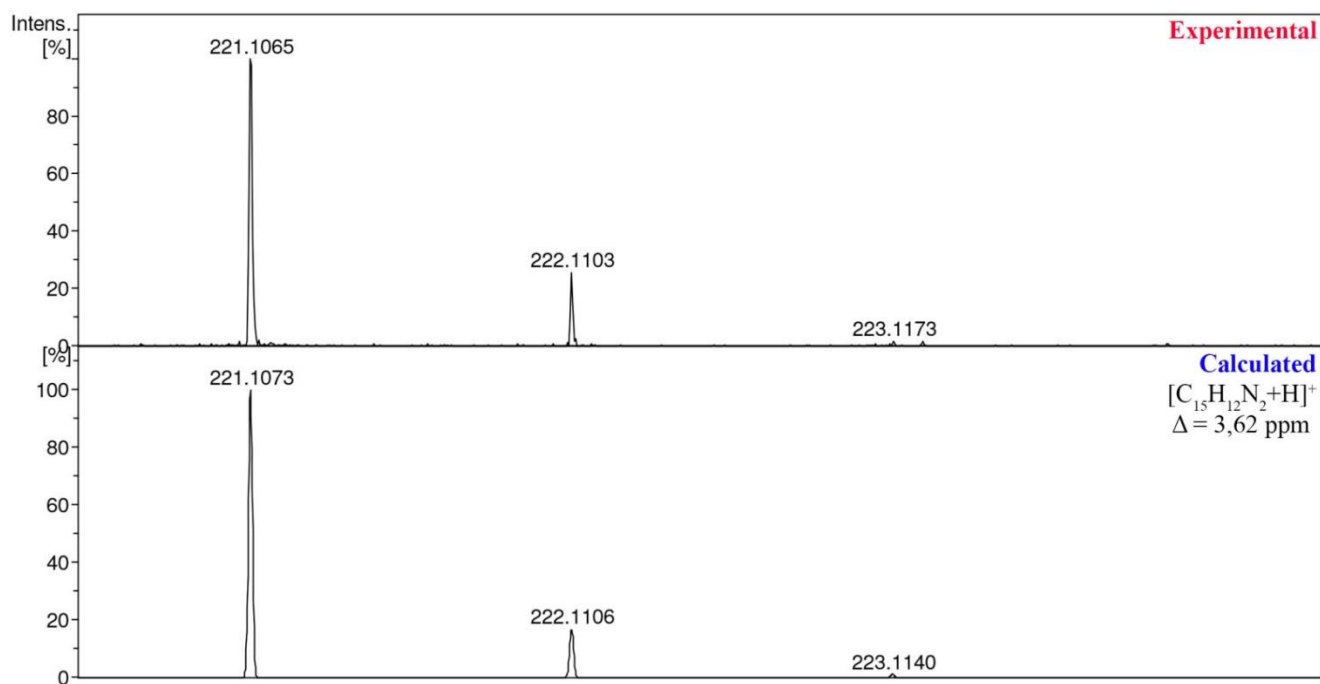

Figure S33. ESI-HRMS of compound 1,3-Diphenyl-1H-pyrazole.

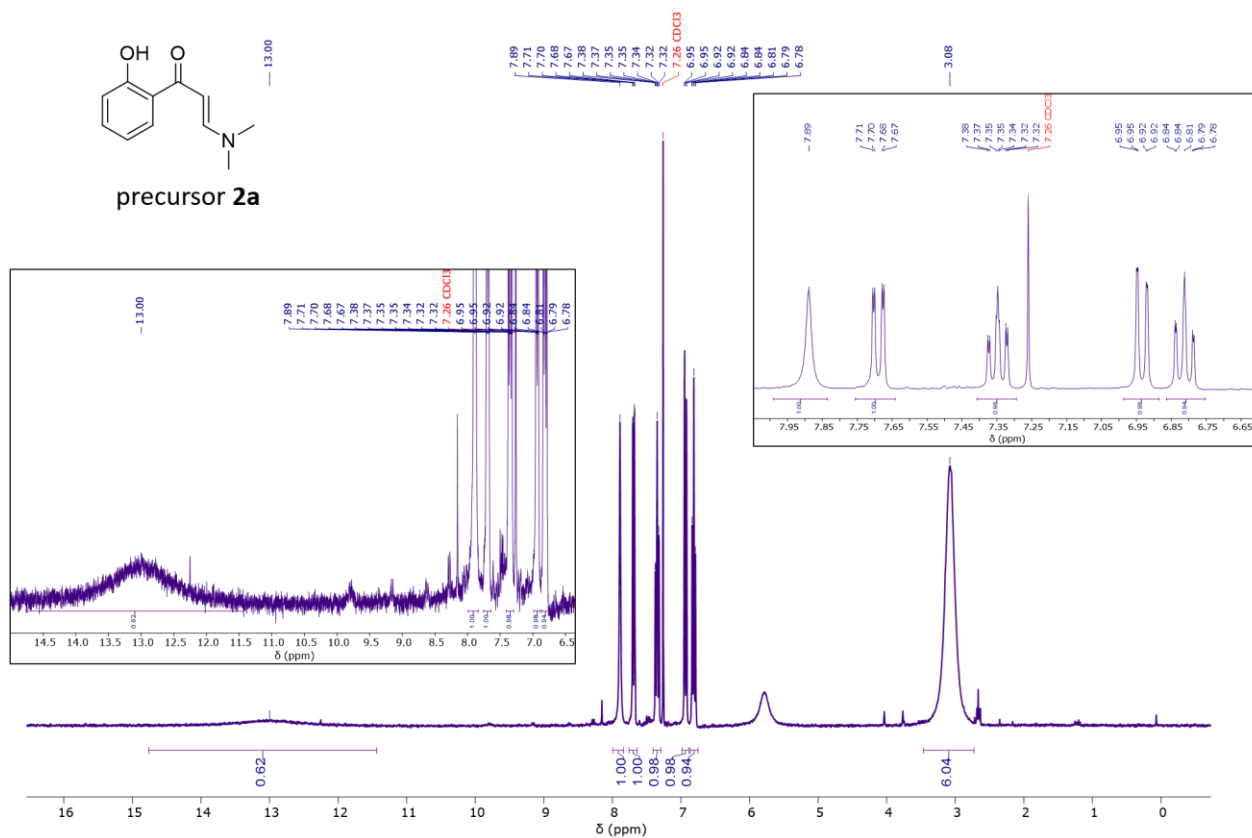

Figure S34.  $^1\text{H}$  NMR spectrum of compound  $(2E)$ -3-(Dimethylamino)-1-(2-hydroxyphenyl)-2-propen-1-one.

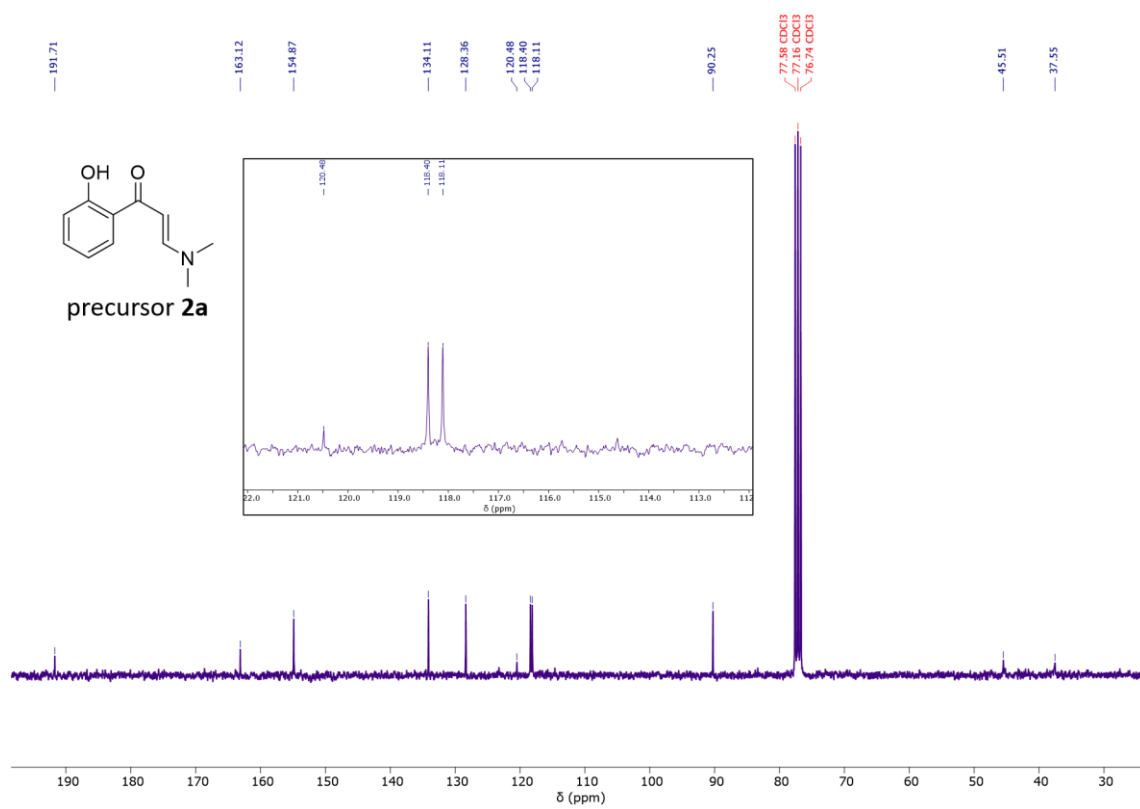

Figure S35.  $^{13}\text{C}$   $\{^1\text{H}\}$  NMR spectrum of compound  $(2E)$ -3-(Dimethylamino)-1-(2-hydroxyphenyl)-2-propen-1-one.

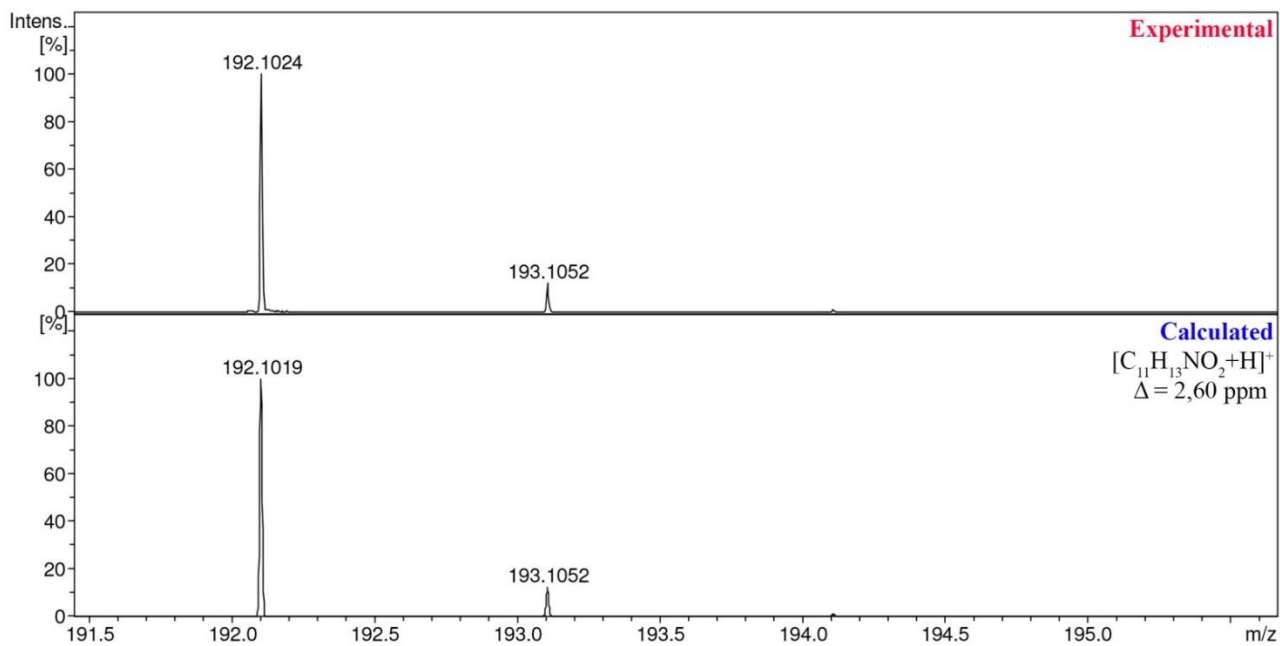

Figure S36. ESI-HRMS of compound (2*E*)-3-(Dimethylamino)-1-(2-hydroxyphenyl)-2-propen-1-one.

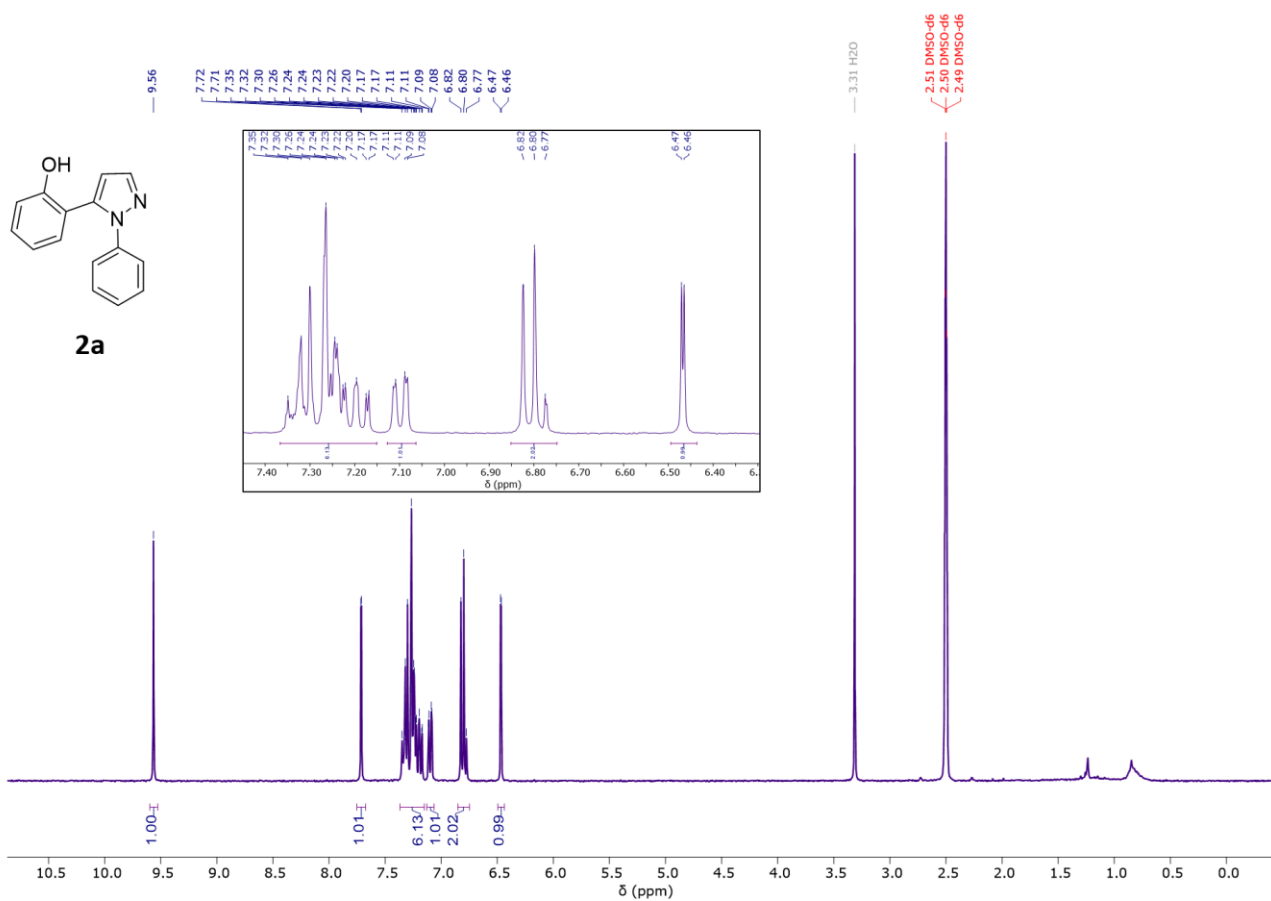

Figure S37.  $^1\text{H}$  NMR spectrum of compound 2-(1-Phenyl-1*H*-pyrazol-5-yl)phenol.

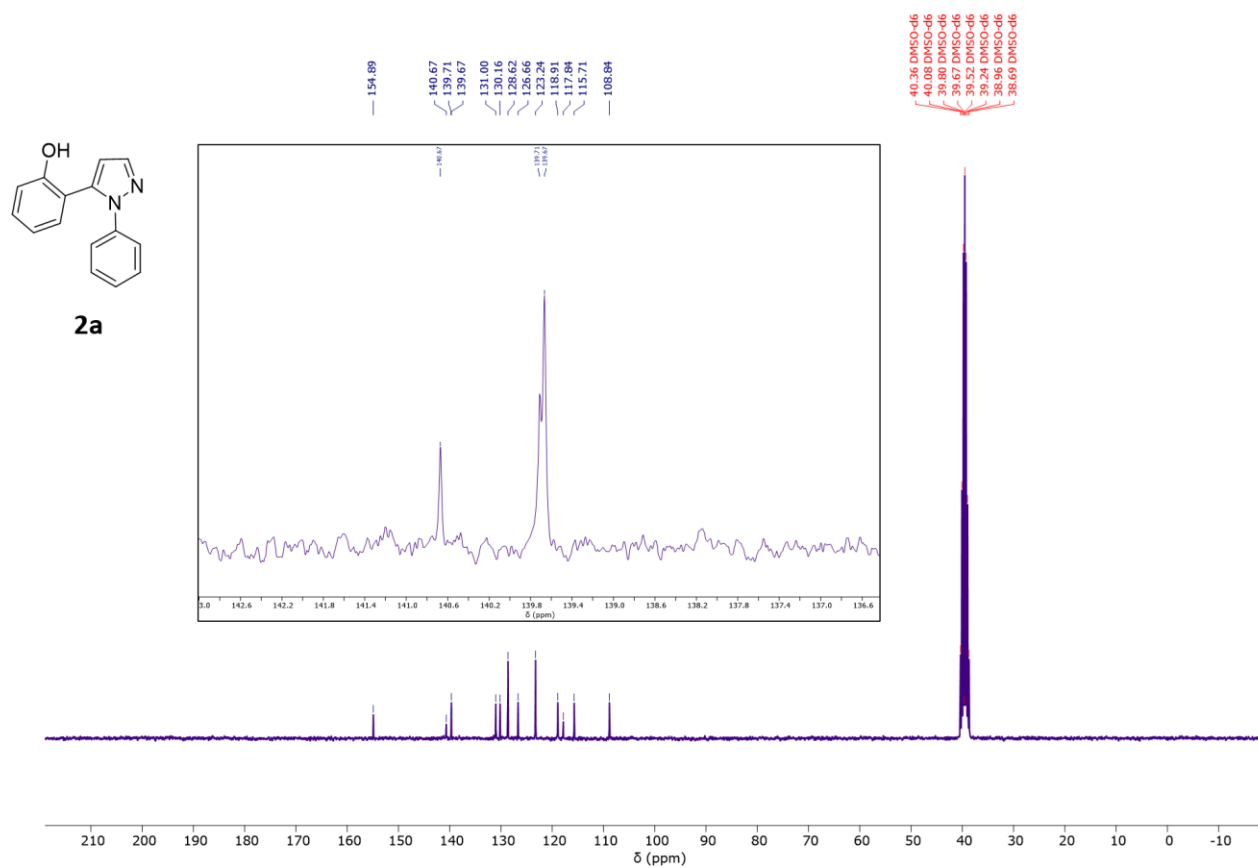

Figure S38.  $^{13}\text{C}$  { $^1\text{H}$ } NMR spectrum of compound 2-(1-Phenyl-1*H*-pyrazol-5-yl)phenol.

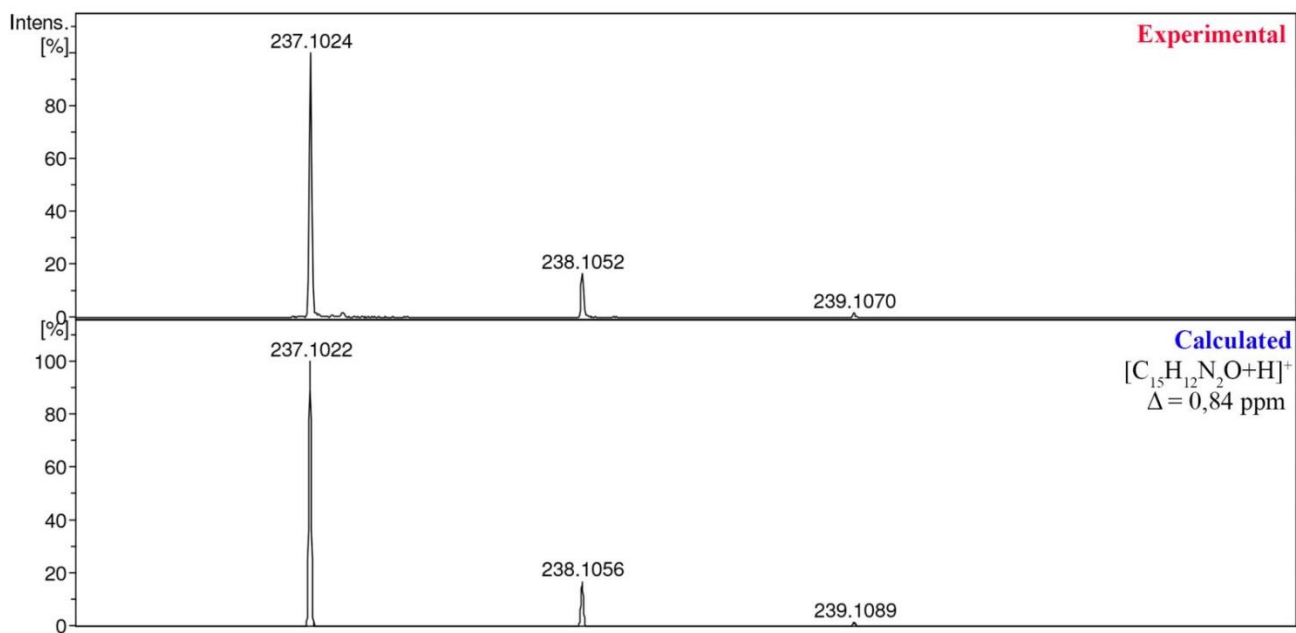

Figure S39. ESI-HRMS of compound 2-(1-Phenyl-1*H*-pyrazol-5-yl)phenol.

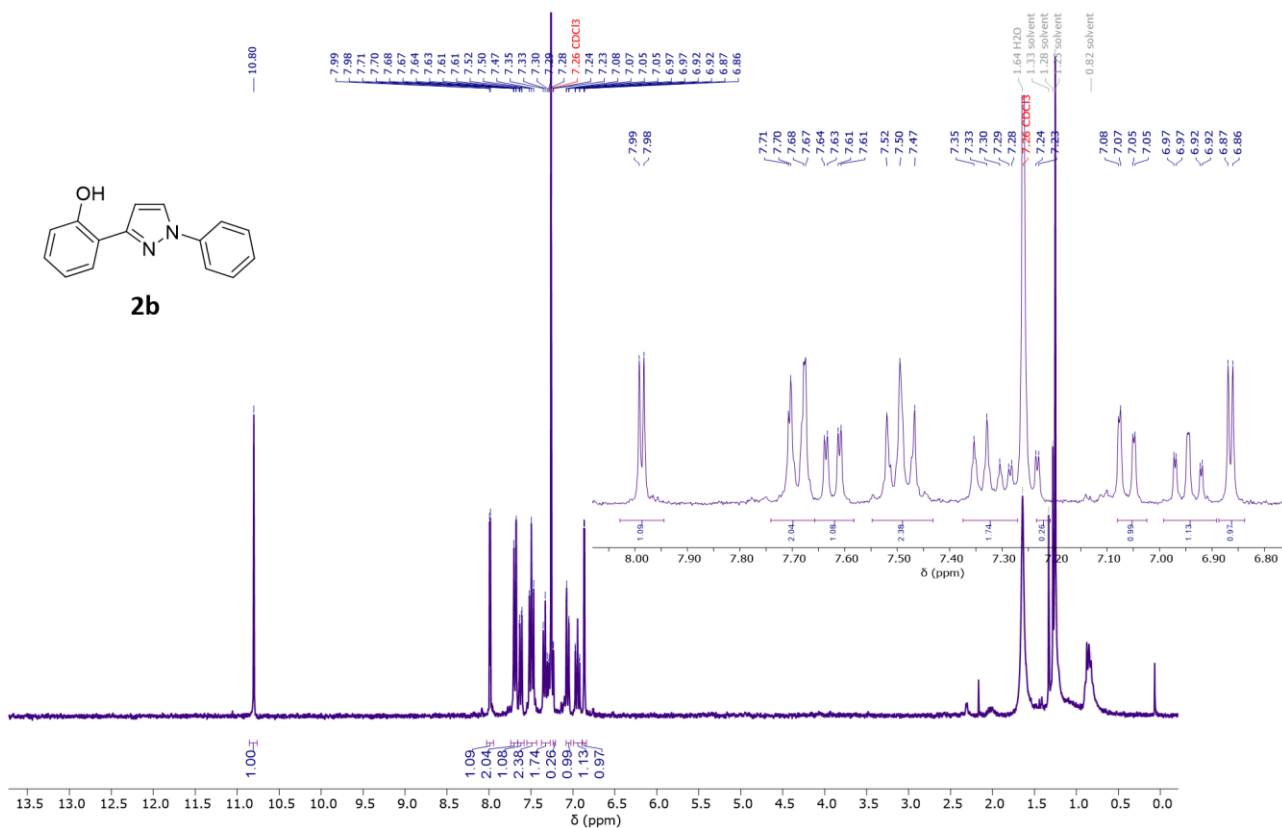

Figure S40. <sup>1</sup>H NMR spectrum of compound 2-(1-Phenyl-1*H*-pyrazol-3-yl)phenol.

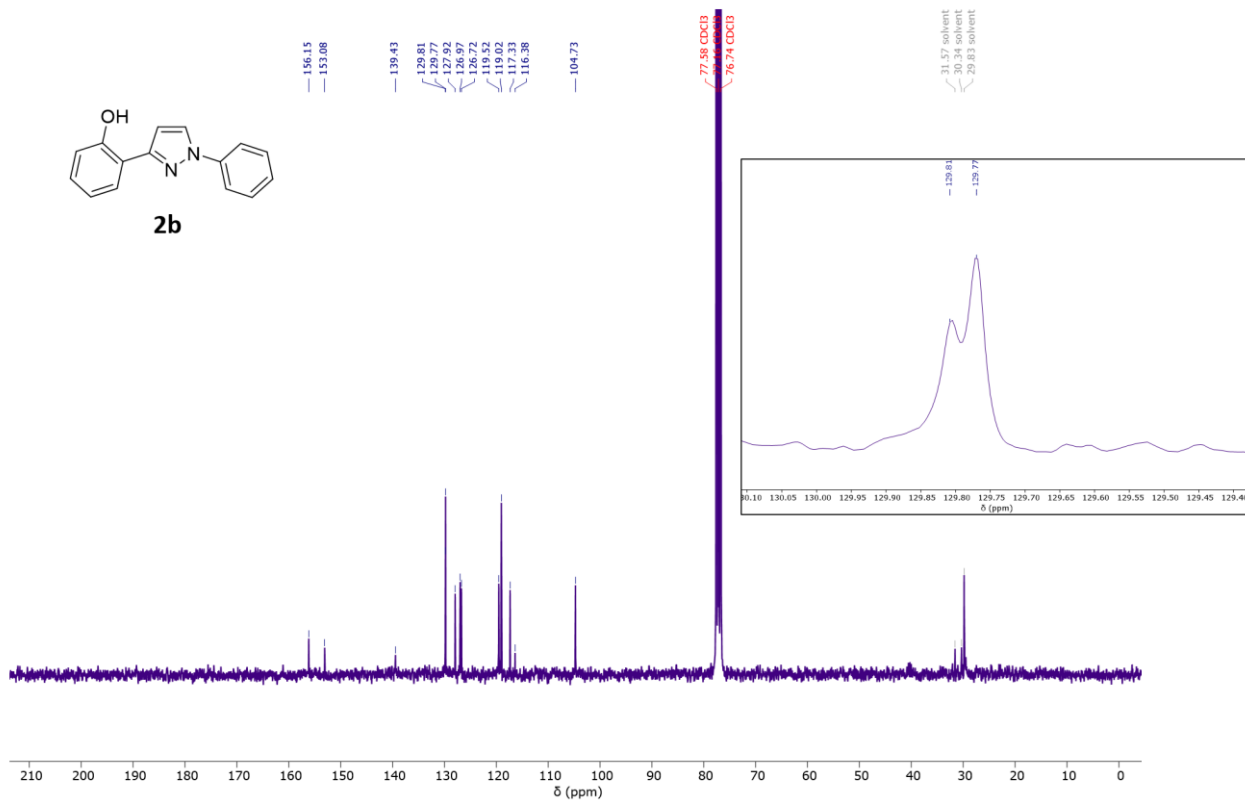

Figure S41. <sup>13</sup>C {<sup>1</sup>H} NMR spectrum of compound 2-(1-Phenyl-1*H*-pyrazol-3-yl)phenol.

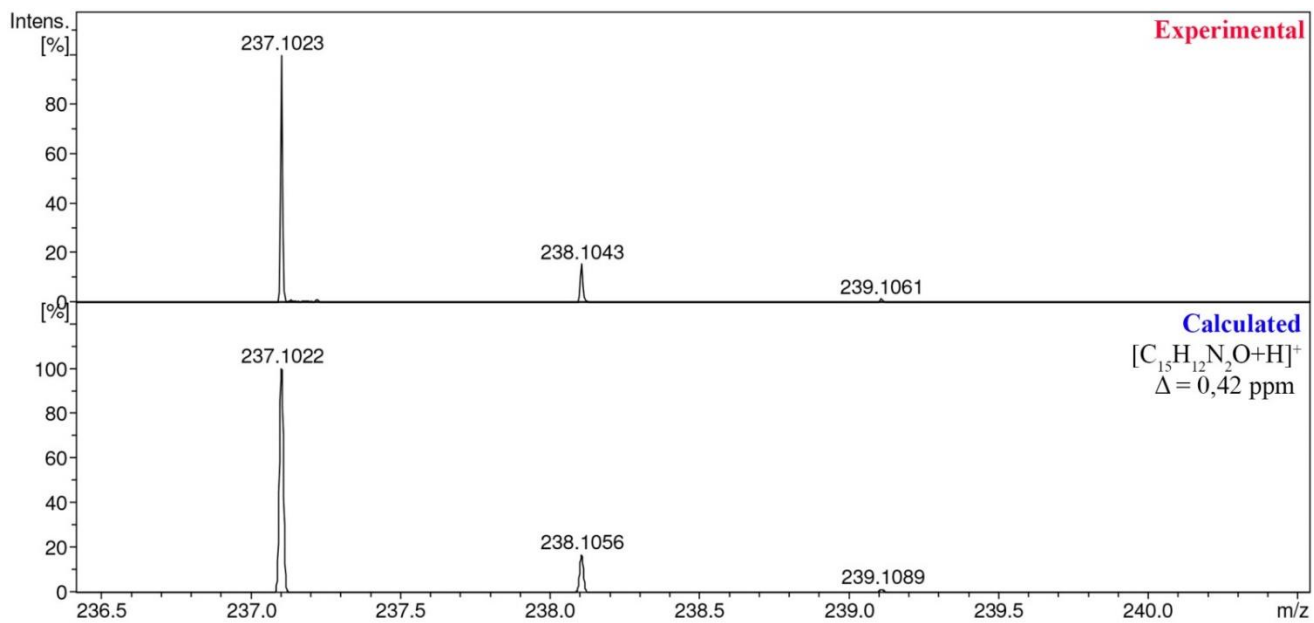

Figure S42. ESI-HRMS of compound 2-(1-Phenyl-1*H*-pyrazol-3-yl)phenol.

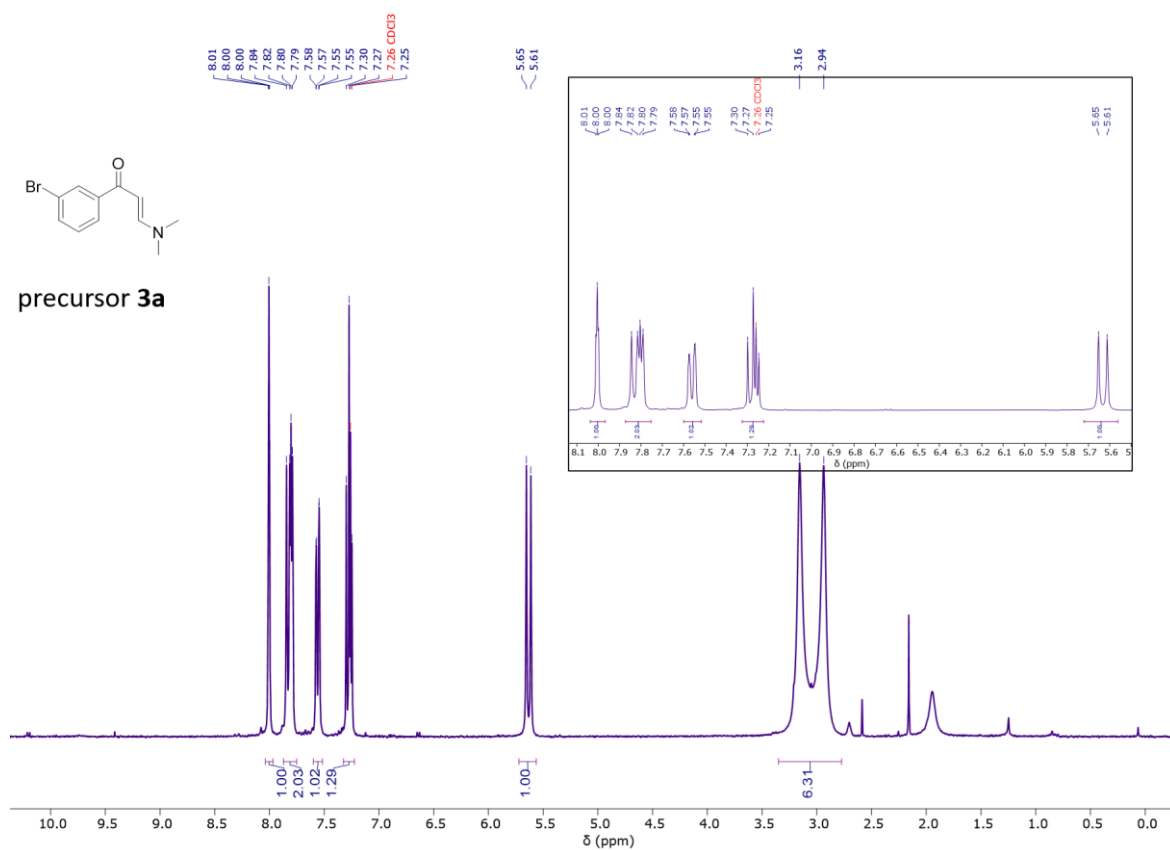

Figure S43.  $^1\text{H}$  NMR spectrum of compound (2*E*)-1-(3-bromophenyl)-3-(dimethylamino)-2-propen-1-one.

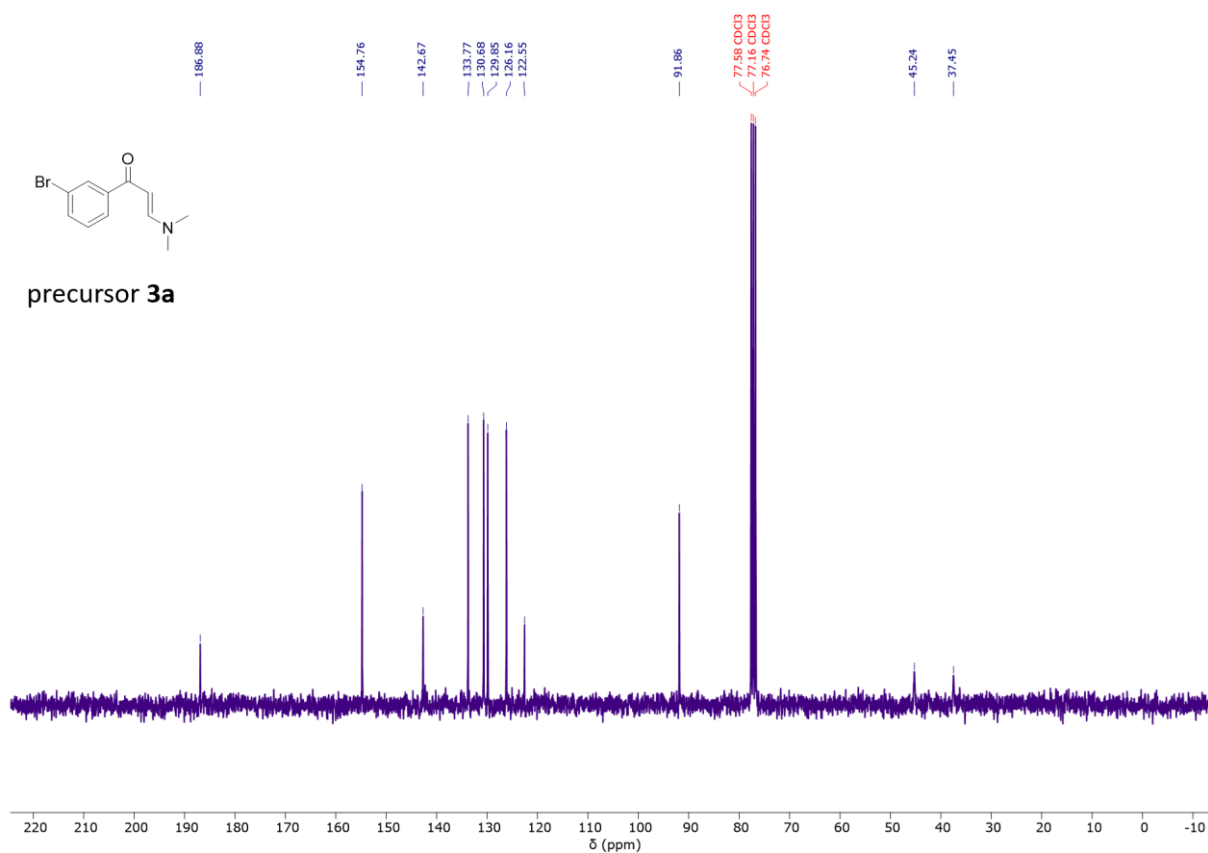

Figure S44.  $^{13}\text{C}$   $\{^1\text{H}\}$  NMR spectrum of compound (2*E*)-1-(3-bromophenyl)-3-(dimethylamino)-2-propen-1-one.



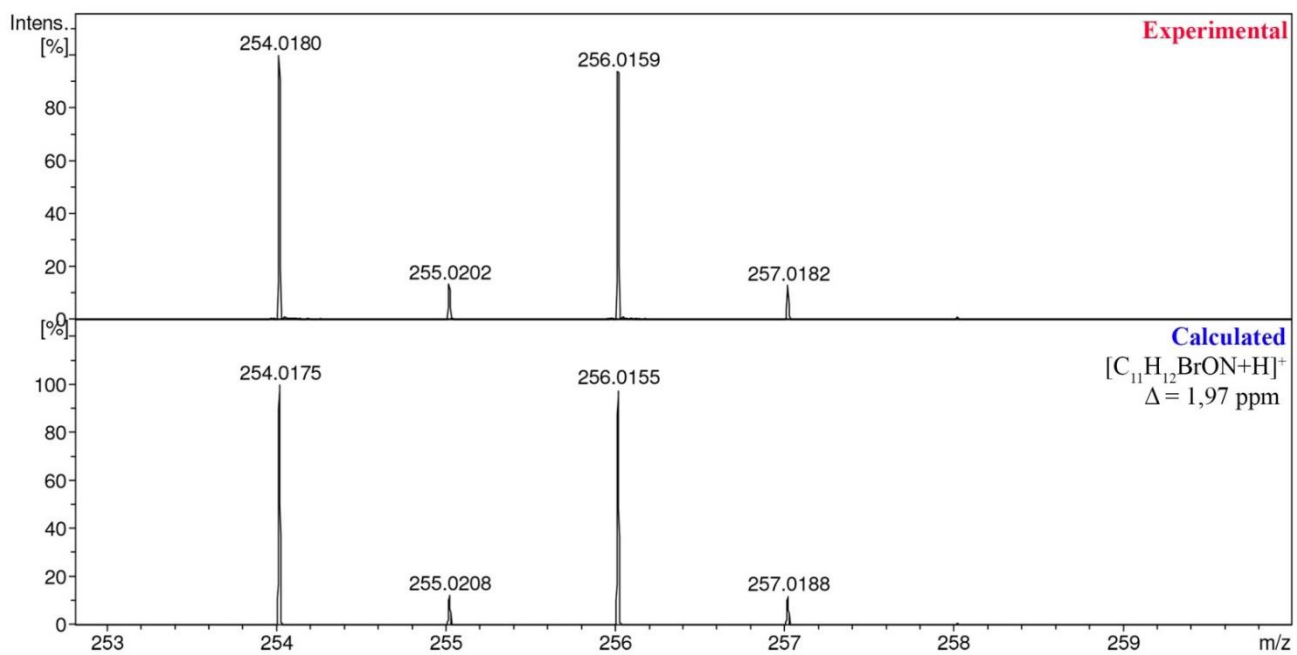

Figure S45. ESI-HRMS of compound (2E)-1-(3-bromophenyl)-3-(dimethylamino)-2-propen-1-one.

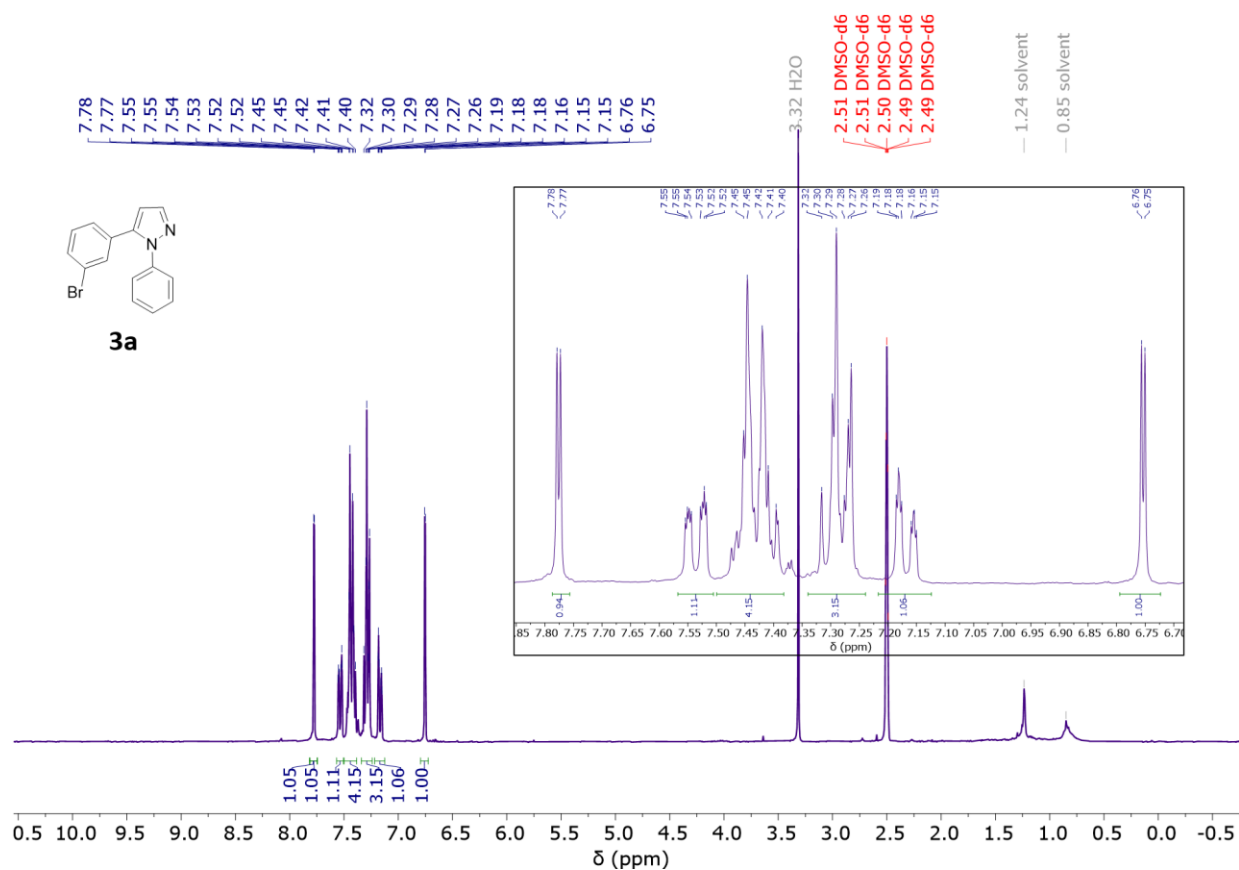

Figure S46.  $^1\text{H}$  NMR spectrum of the compound 5-(3-bromophenyl)-1-phenyl-*1H*-pyrazole.

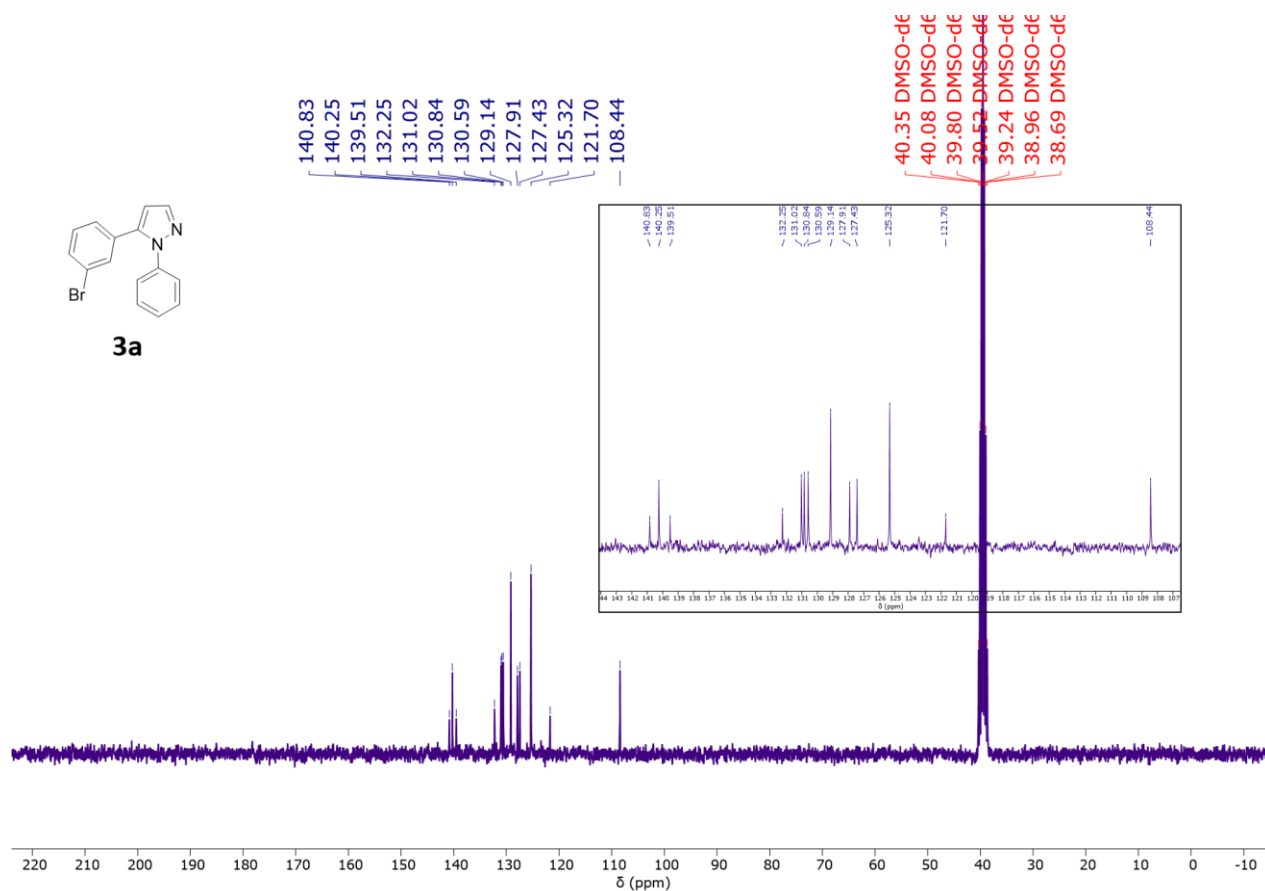

Figure S47.  $^{13}\text{C}$   $\{^1\text{H}\}$  NMR spectrum of the compound 5-(3-bromophenyl)-1-phenyl-*1H*-pyrazole.

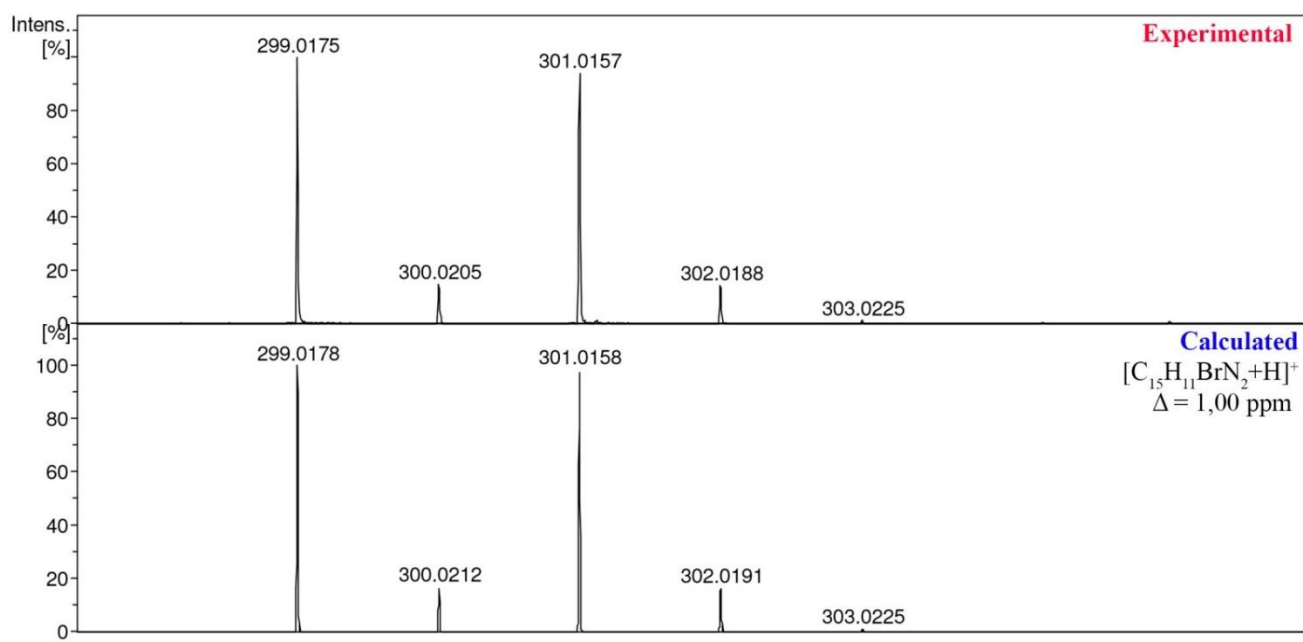

Figure S48. ESI-HRMS of the compound 5-(3-bromophenyl)-1-phenyl-1H-pyrazole.

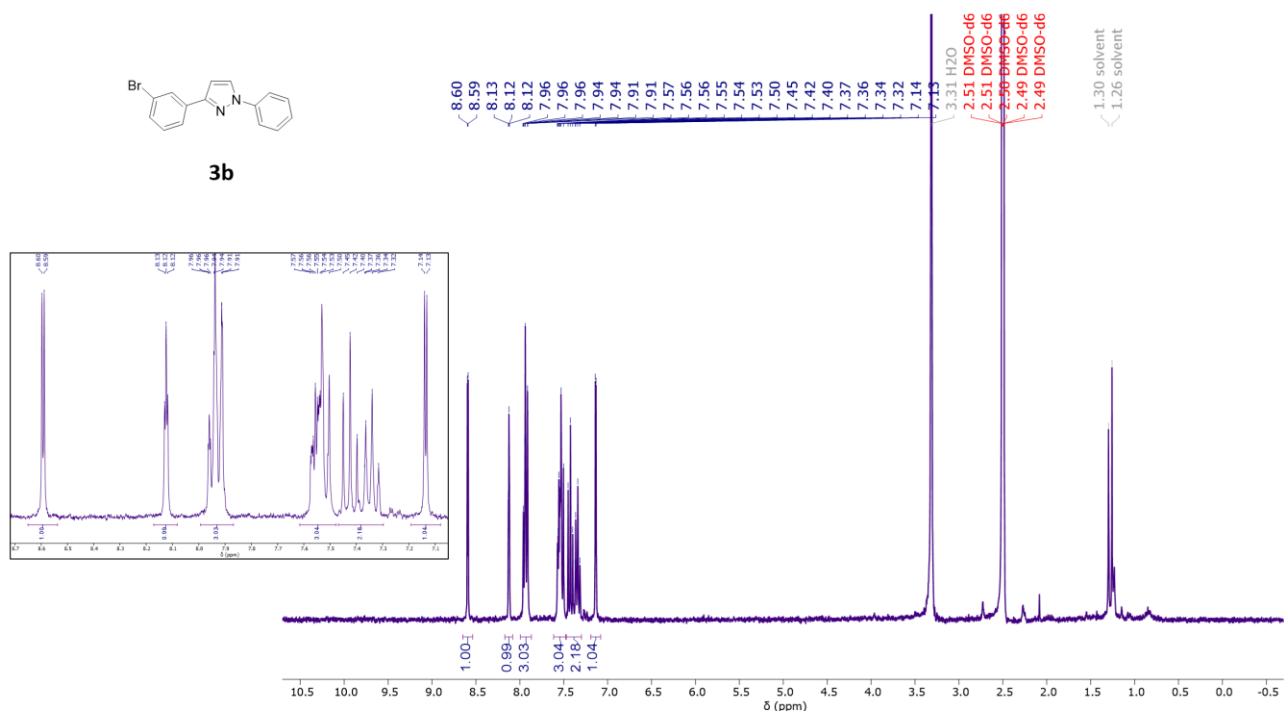

Figure S49.  $^1\text{H}$  NMR spectrum of 3-(3-bromophenyl)-1-phenyl-*1H*-pyrazole.

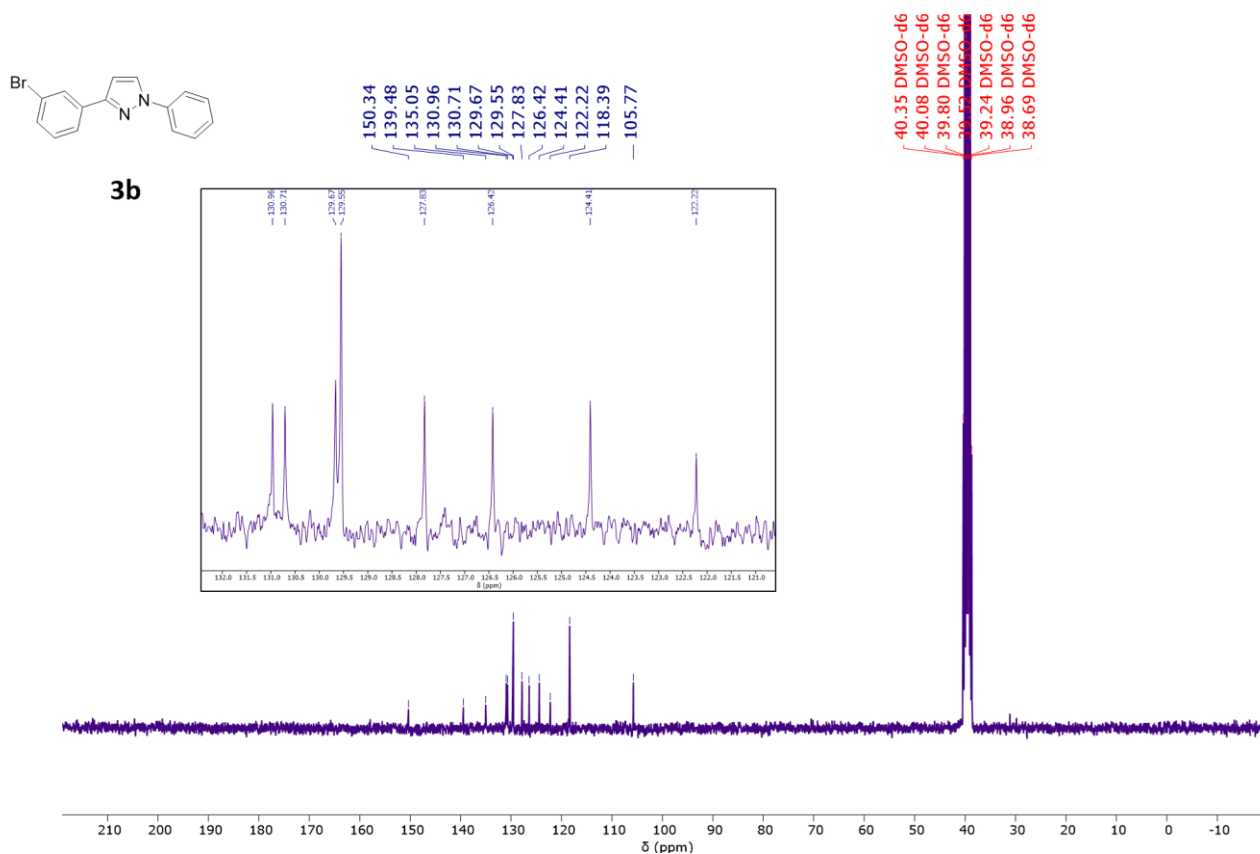

Figure S50.  $^{13}\text{C}$   $\{^1\text{H}\}$  NMR spectrum of 3-(3-bromophenyl)-1-phenyl-*1H*-pyrazole.

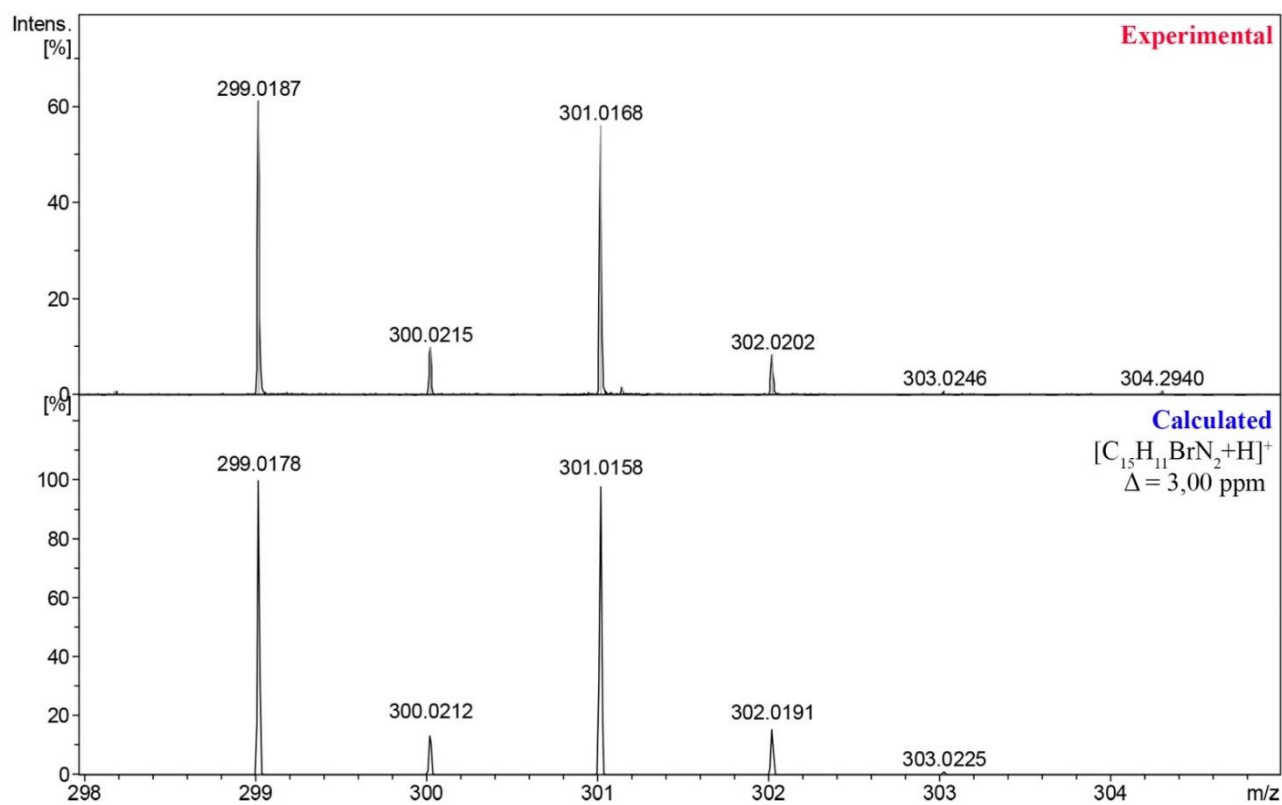

Figure S51. ESI-HRMS of compound 3-(3-Bromophenyl)-1-phenyl-1*H*-pyrazole.

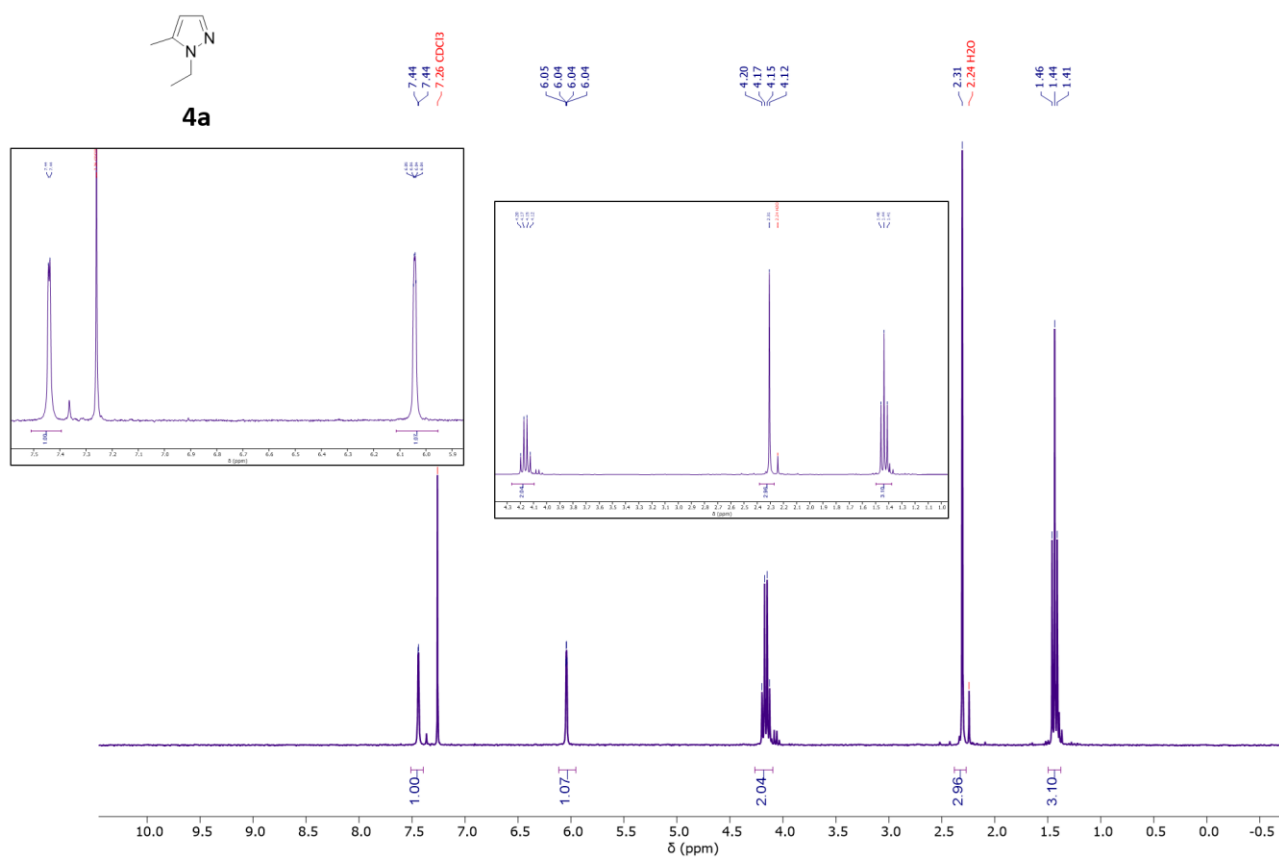

Figure S52.  $^1\text{H}$  NMR spectrum of compound 1-ethyl-5-methyl-*1H*-pyrazole.

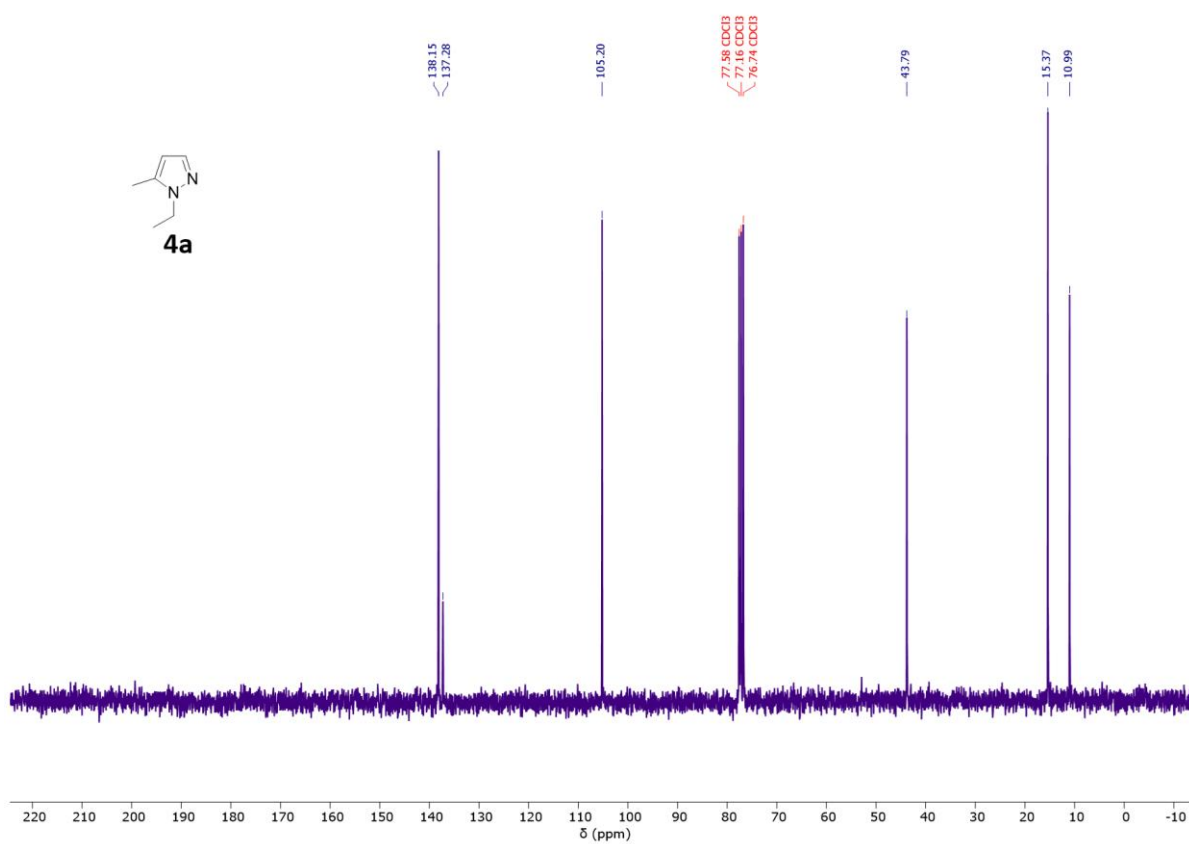

Figure S53.  $^{13}\text{C}$   $\{^1\text{H}\}$  NMR spectrum of compound 1-ethyl-5-methyl-*1H*-pyrazole.

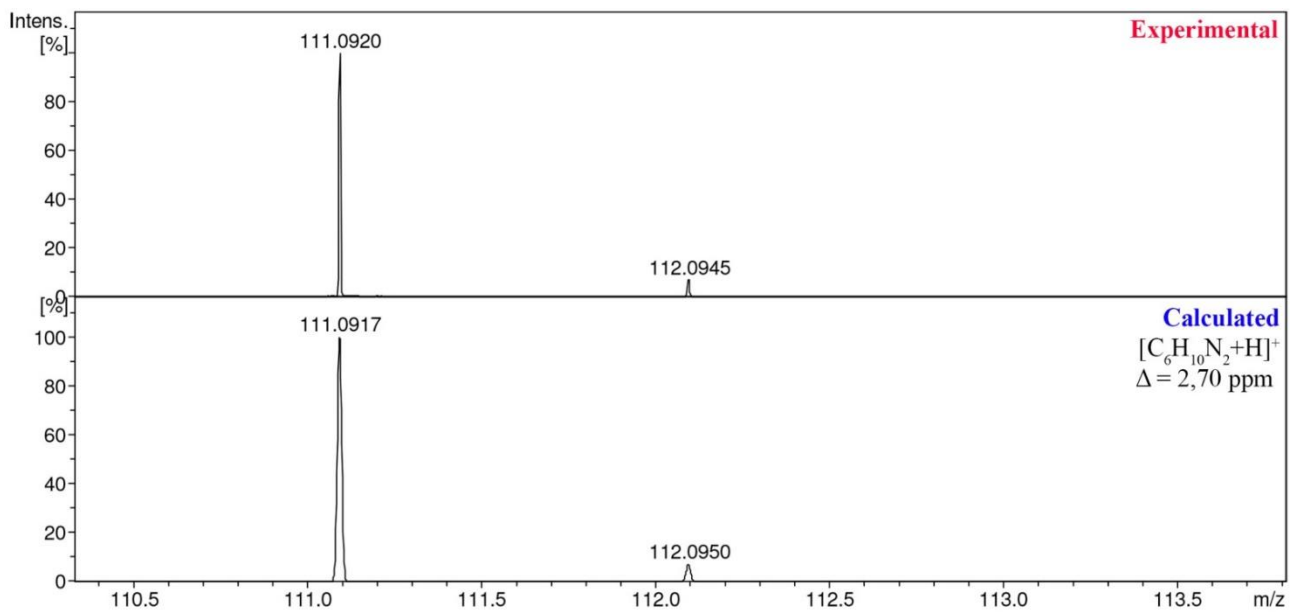

Figure S54. ESI-HRMS of compound 1-ethyl-5-methyl-*1H*-pyrazole.

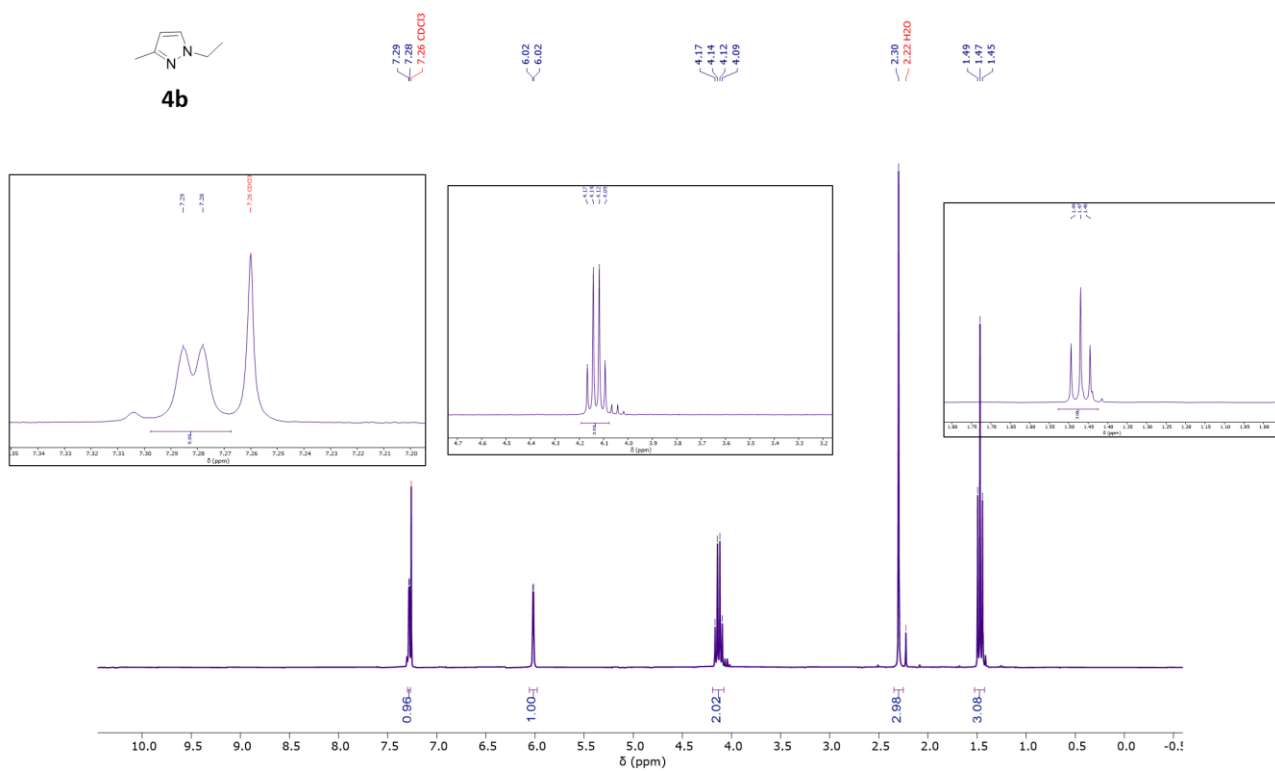

Figure S55.  $^1\text{H}$  NMR spectrum of compound 1-ethyl-3-methyl-1H-pyrazole.

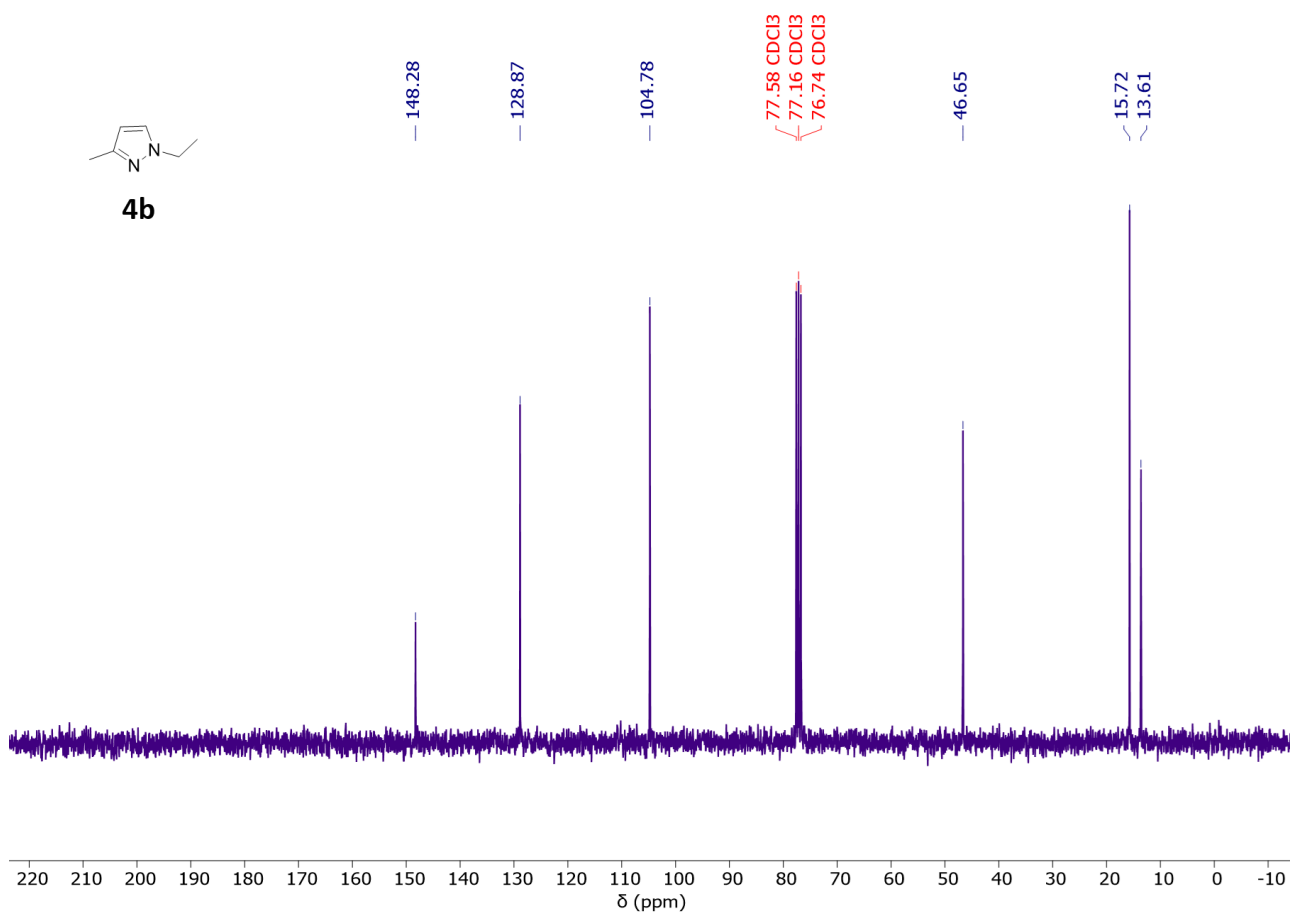

Figure S56.  $^{13}\text{C}$   $\{^1\text{H}\}$  NMR spectrum of compound 1-ethyl-3-methyl-1H-pyrazole.



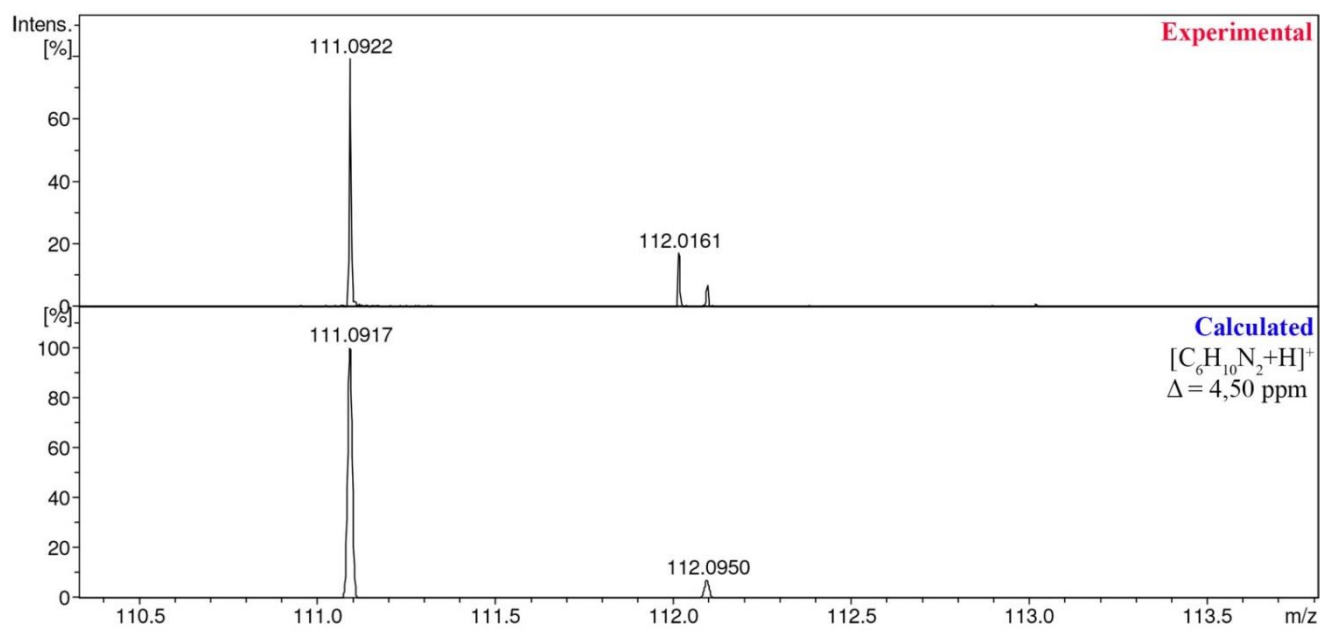

Figure S57. ESI-HRMS of compound 1-ethyl-3-methyl-1H-pyrazole.

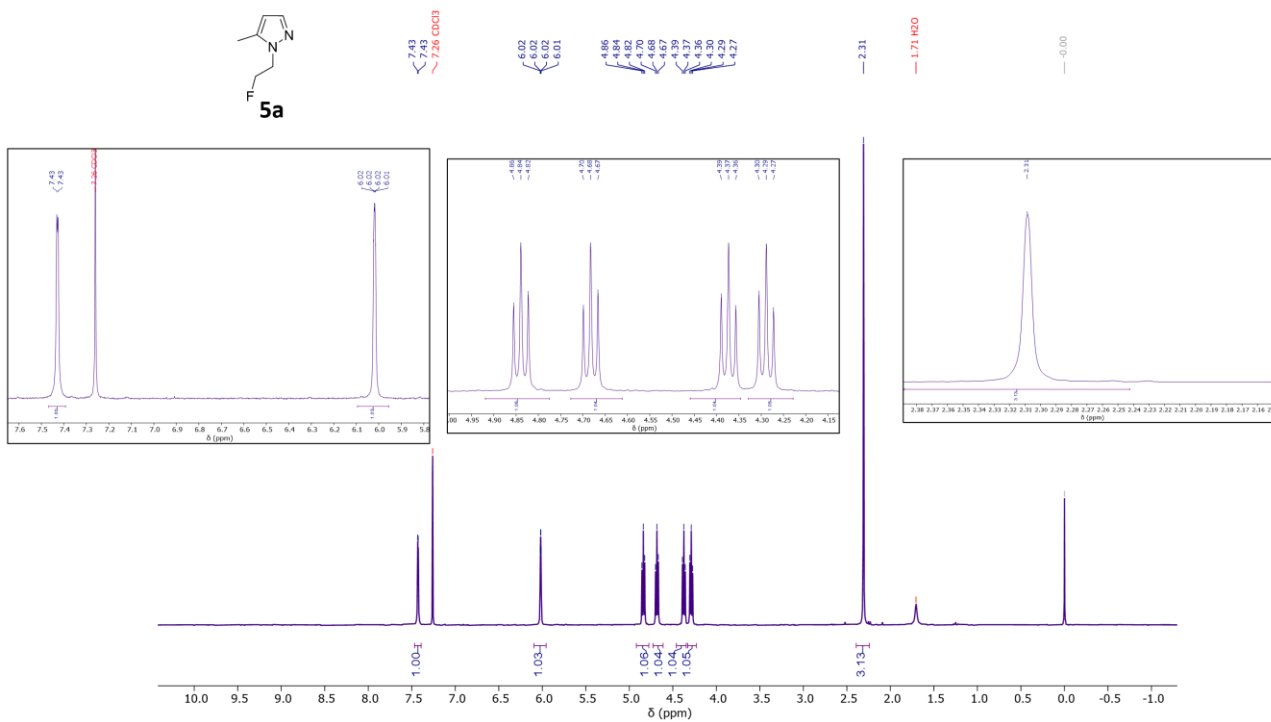

Figure S58. <sup>1</sup>H NMR spectrum of compound 1-(2-Fluoroethyl)-5-methyl-1H-pyrazole.

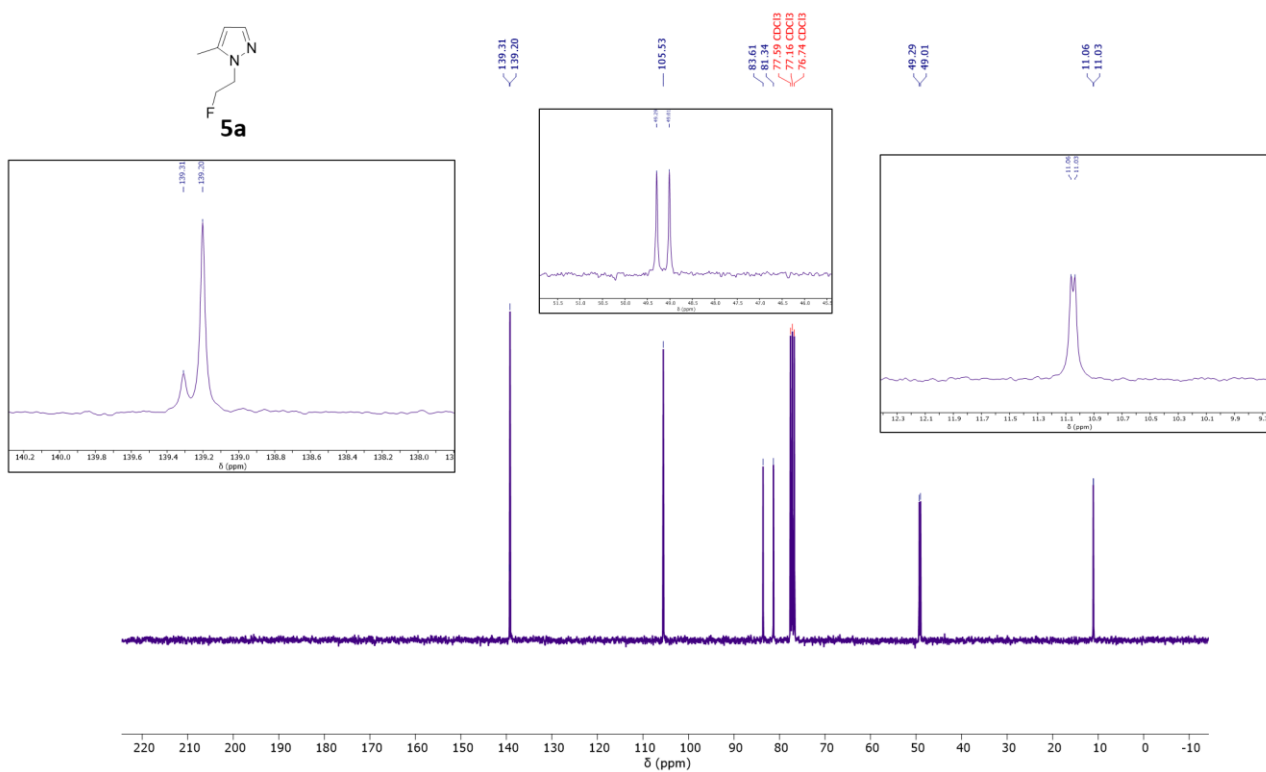

Figure S59. <sup>13</sup>C {<sup>1</sup>H} NMR spectrum of compound 1-(2-fluoroethyl)-5-methyl-1H-pyrazole.

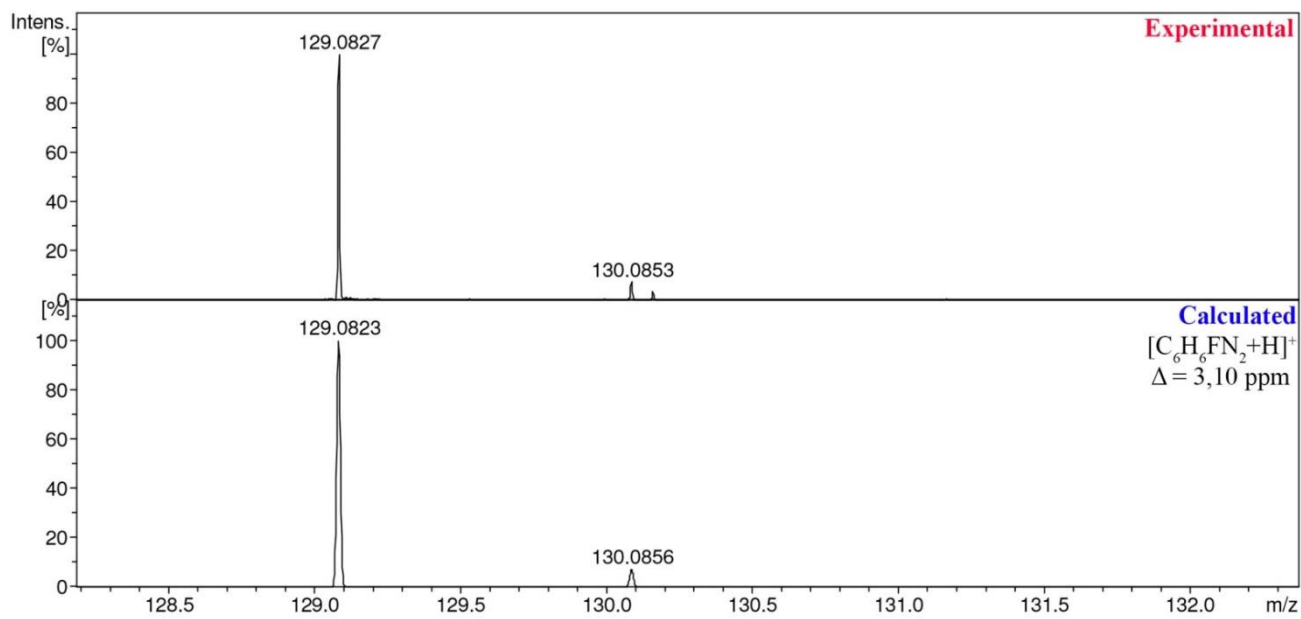

Figure S60. ESI-HRMS of the compound 1-(2-fluoroethyl)-5-methyl-1H-pyrazole.



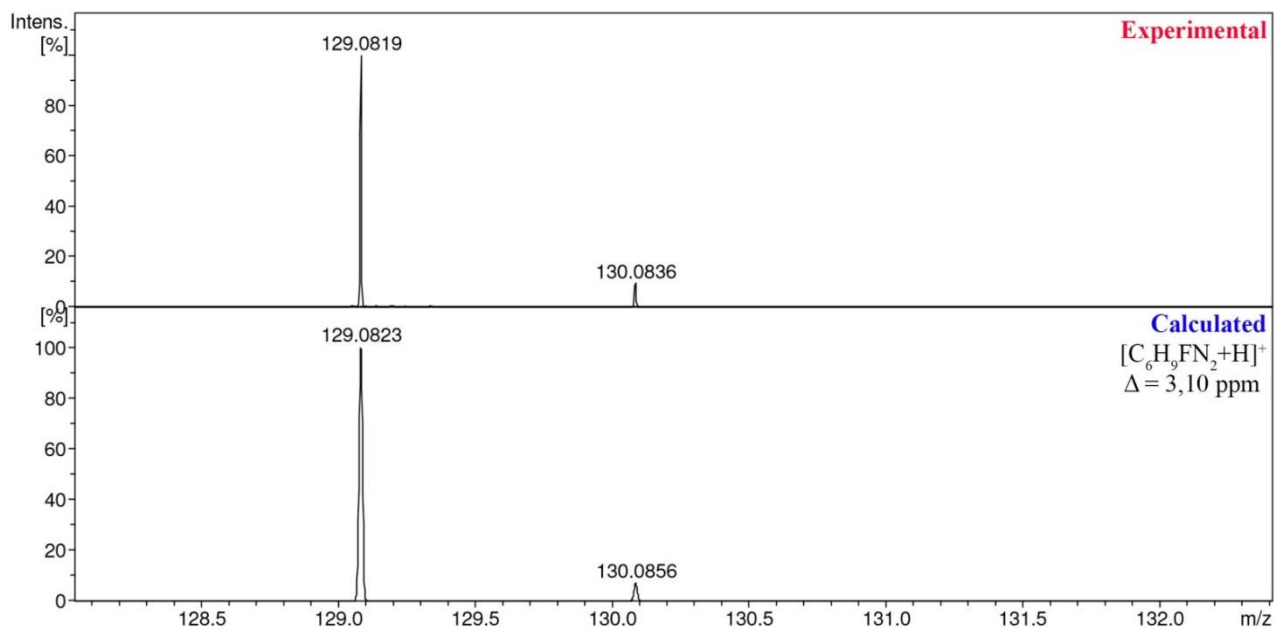

Figure S63. ESI-HRMS of the compound 1-(2-fluoroethyl)-3-methyl-1H-pyrazole.

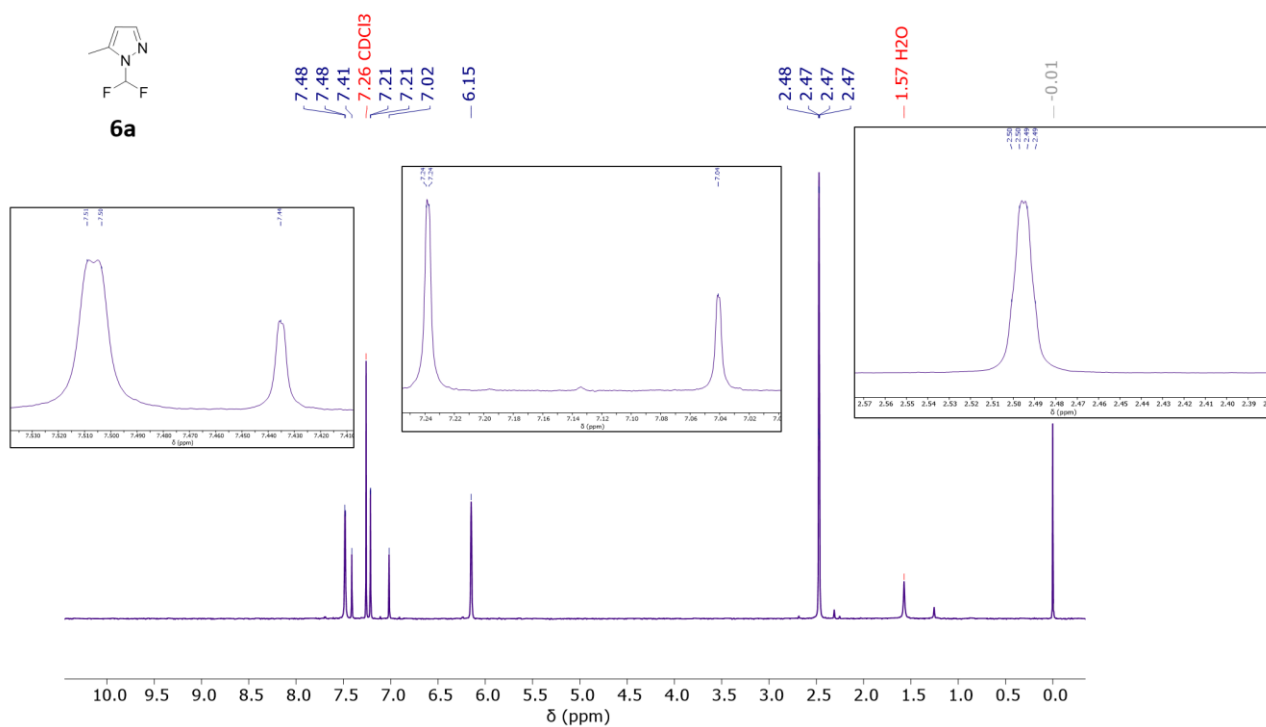

Figure S64. <sup>1</sup>H NMR spectrum of compound 1-(difluoromethyl)-5-methyl-1H-pyrazole.

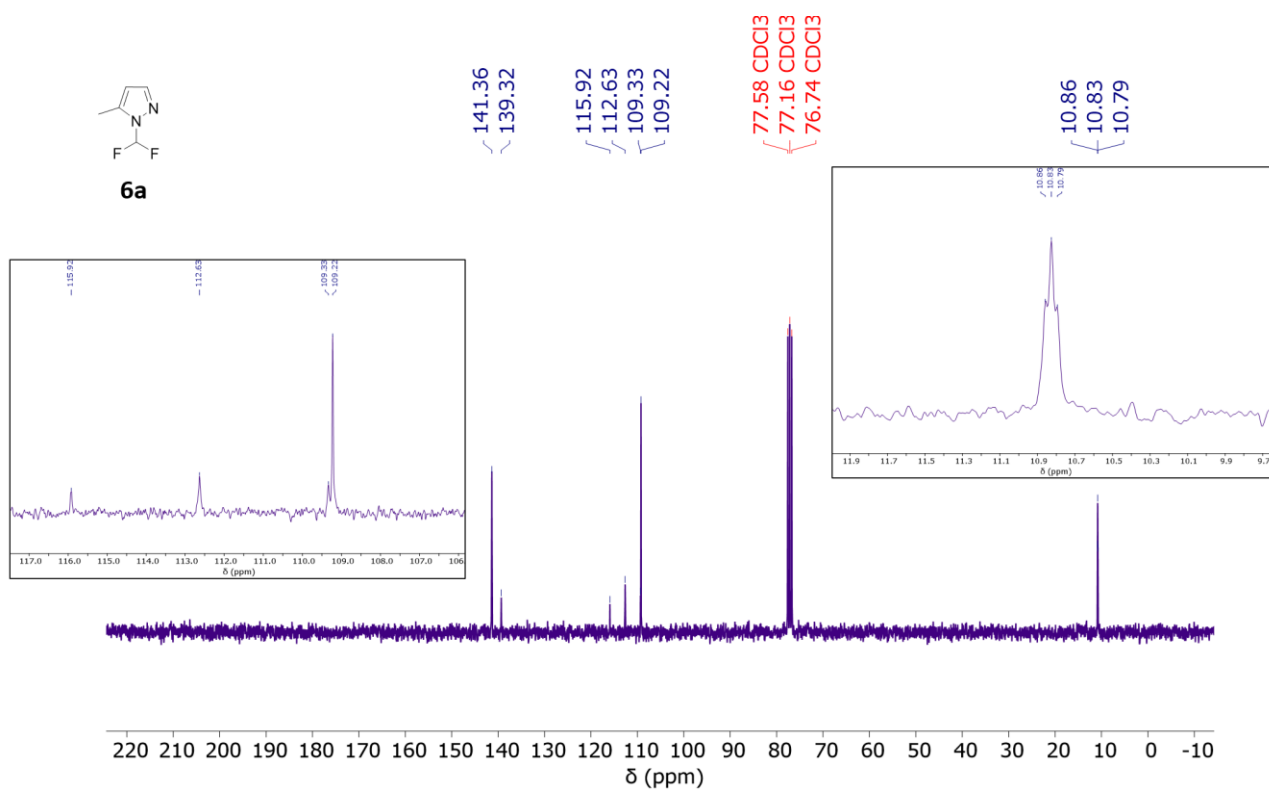

Figure S65. <sup>13</sup>C {<sup>1</sup>H} NMR spectrum of compound 1-(difluoromethyl)-5-methyl-1H-pyrazole.

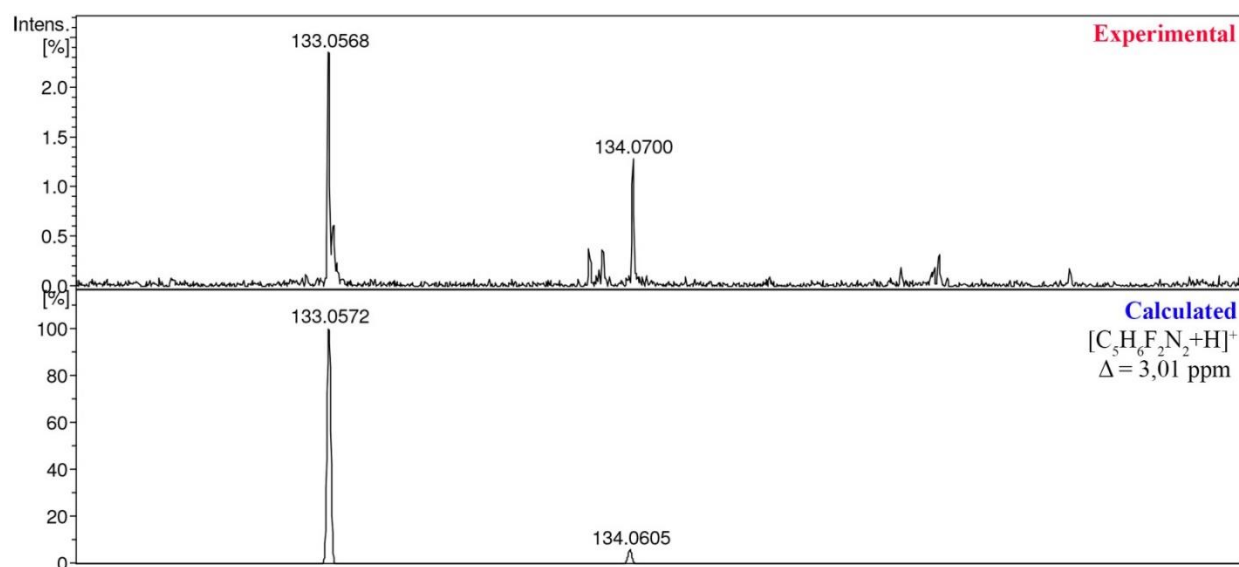

Figure S66. ESI-HRMS of the compound 1-(difluoromethyl)-5-methyl-1H-pyrazole.

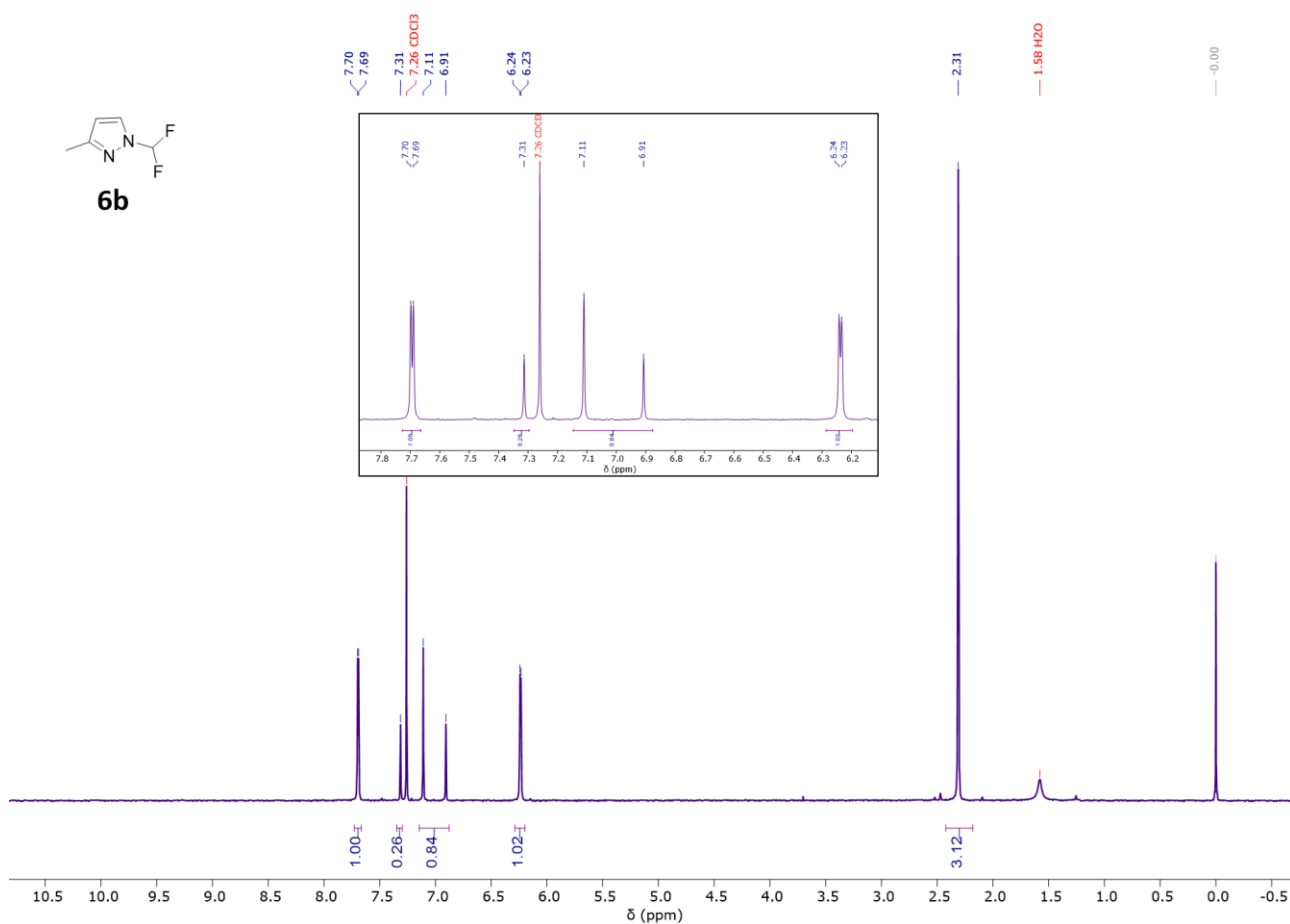

Figure S67.  $^1\text{H}$  NMR spectrum of compound 1-(difluoromethyl)-3-methyl-*1H*-pyrazole.

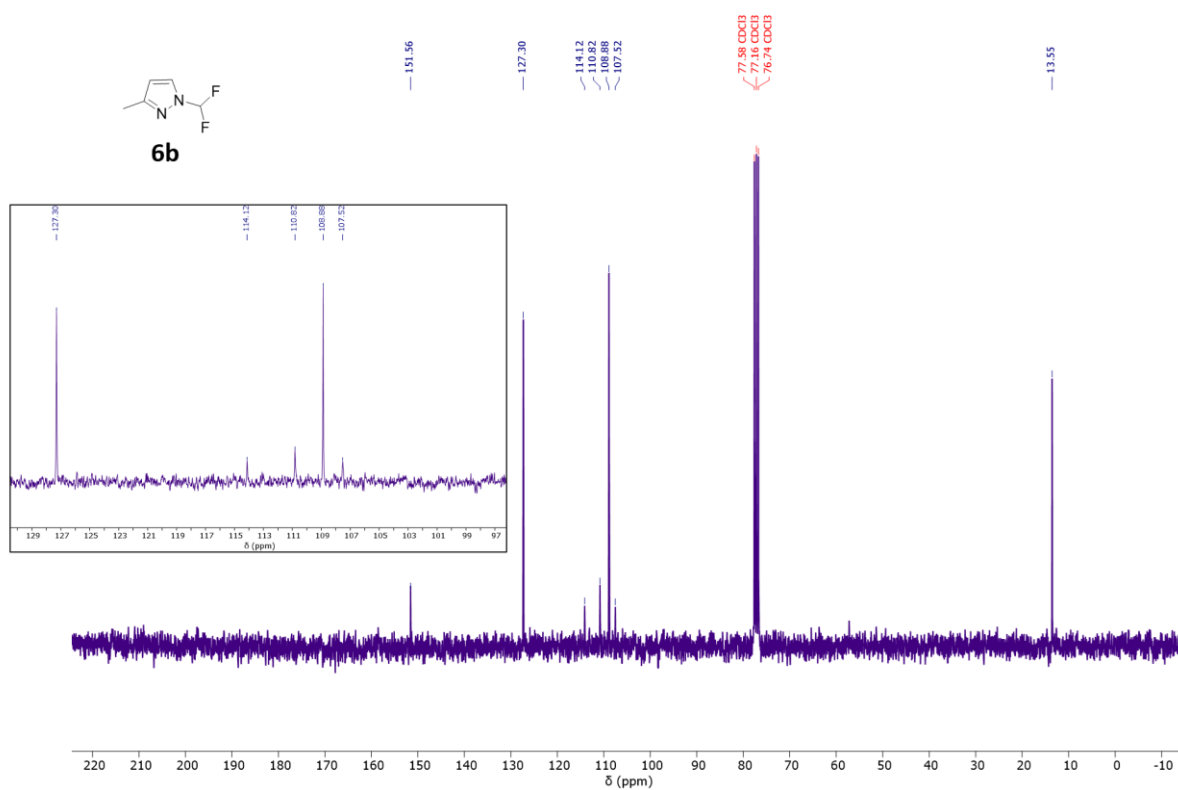

Figure S68.  $^{13}\text{C}$   $\{^1\text{H}\}$  NMR spectrum of compound 1-(difluoromethyl)-3-methyl-*1H*-pyrazole.



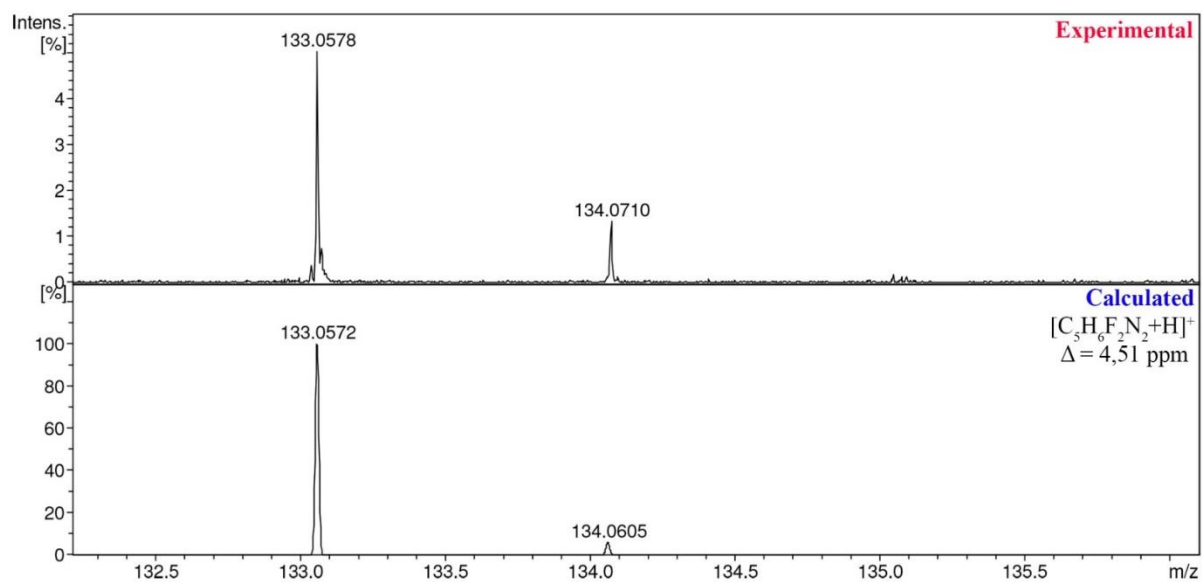

Figure S69. ESI-HRMS of the compound 1-(difluoromethyl)-3-methyl-1H-pyrazole.

X-ray crystallographic data and refinement details.

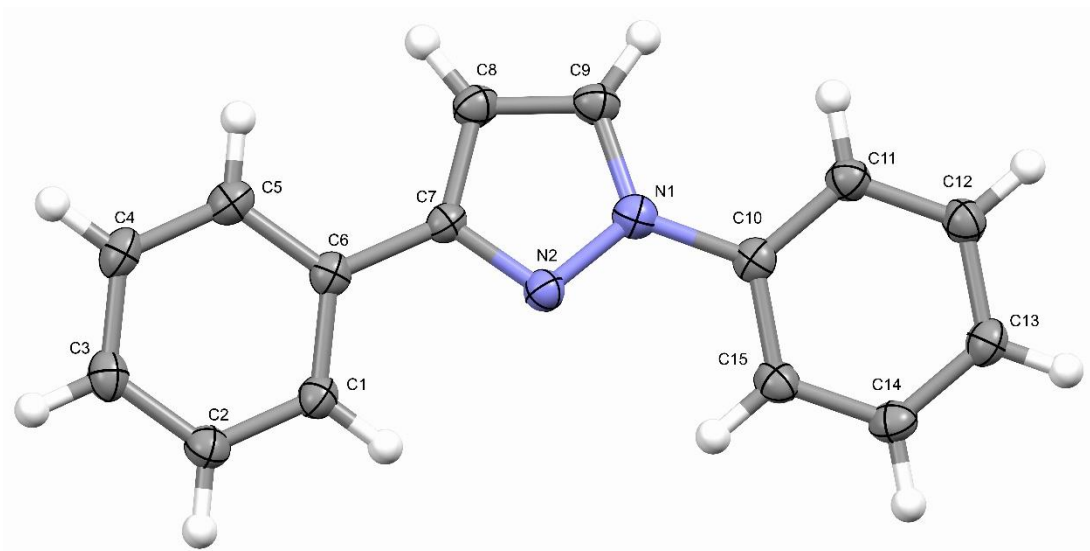

Figure S70. X-ray crystallographic images of 1,3-diphenyl-1*H*-pyrazole.

Table S1. Crystal data and structure refinement for 1,3-diphenyl-1H-pyrazole.

|                                   |                                                    |                   |
|-----------------------------------|----------------------------------------------------|-------------------|
| Empirical formula                 | for C <sub>15</sub> H <sub>12</sub> N <sub>2</sub> |                   |
| Formula weight                    | 220.27                                             |                   |
| Temperature                       | 100.00(10) K                                       |                   |
| Wavelength                        | 1.54184 Å                                          |                   |
| Crystal system                    | Monoclinic                                         |                   |
| Space group                       | P2 <sub>1</sub> /c                                 |                   |
| Unit cell dimensions              | a = 5.55130(10) Å                                  | α = 90°.          |
|                                   | b = 9.08050(10) Å                                  | β = 93.8320(10)°. |
|                                   | c = 22.6176(3) Å                                   | γ = 90°.          |
| Volume                            | 1137.57(3) Å <sup>3</sup>                          |                   |
| Z                                 | 4                                                  |                   |
| Density (calculated)              | 1.286 g/cm <sup>3</sup>                            |                   |
| Absorption coefficient            | 0.599 mm <sup>-1</sup>                             |                   |
| F(000)                            | 464                                                |                   |
| Crystal size                      | 0.31 × 0.17 × 0.04 mm <sup>3</sup>                 |                   |
| Theta range for data collection   | 3.918-79.783°.                                     |                   |
| Index ranges                      | -6 ≤ h ≤ 7, -11 ≤ k ≤ 7, -28 ≤ l ≤ 28              |                   |
| Reflections collected             | 13169                                              |                   |
| Independent reflections           | 2471 [R(int) = 0.0266]                             |                   |
| Observed reflections              | 2305                                               |                   |
| Completeness to theta = 67.684°   | 100.0%                                             |                   |
| Absorption correction             | Gaussian                                           |                   |
| Max. and min. transmission        | 1.000 and 0.512                                    |                   |
| Refinement method                 | Full-matrix least-squares on F <sup>2</sup>        |                   |
| Data/restraints/parameters        | 2471/0/155                                         |                   |
| Goodness-of-fit on F <sup>2</sup> | 1.030                                              |                   |
| Final R indices [I > 2 sigma(I)]  | R1 = 0.0397, wR2 = 0.1100                          |                   |
| R indices (all data)              | R1 = 0.0420, wR2 = 0.1123                          |                   |
| Extinction coefficient            | 0.0020(5)                                          |                   |
| Largest diff. peak and hole       | 0.391 and -0.253 e.Å <sup>-3</sup>                 |                   |

Table S2. Atomic coordinates ( $\times 10^4$ ) and equivalent isotropic displacement parameters ( $\text{\AA}^2 \times 10^3$ ) for 1,3-diphenyl-1H-pyrazole.  $U(\text{eq})$  is defined as one third of the trace of the orthogonalized  $U_{ij}$  tensor.

|       | x       | y       | z       | U(eq) |
|-------|---------|---------|---------|-------|
| N(1)  | 3824(2) | 5084(1) | 7278(1) | 26(1) |
| N(2)  | 3444(2) | 5995(1) | 6806(1) | 24(1) |
| C(1)  | 3251(2) | 7245(1) | 5656(1) | 24(1) |
| C(2)  | 3301(2) | 7945(1) | 5111(1) | 28(1) |
| C(3)  | 5178(2) | 7683(1) | 4748(1) | 28(1) |
| C(4)  | 7023(2) | 6730(1) | 4938(1) | 28(1) |
| C(5)  | 7002(2) | 6037(1) | 5484(1) | 26(1) |
| C(6)  | 5098(2) | 6280(1) | 5847(1) | 23(1) |
| C(7)  | 5021(2) | 5545(1) | 6415(1) | 21(1) |
| C(8)  | 6393(2) | 4353(1) | 6640(1) | 27(1) |
| C(9)  | 5612(2) | 4076(1) | 7189(1) | 26(1) |
| C(10) | 2419(2) | 5246(1) | 7785(1) | 23(1) |
| C(11) | 3116(2) | 4505(1) | 8307(1) | 26(1) |
| C(12) | 1769(2) | 4655(1) | 8799(1) | 28(1) |
| C(13) | -268(2) | 5550(1) | 8773(1) | 27(1) |
| C(14) | -949(2) | 6293(1) | 8252(1) | 28(1) |
| C(15) | 376(2)  | 6144(1) | 7756(1) | 26(1) |

Table S3. Bond lengths [Å] and angles [°] for 1,3-diphenyl-1H-pyrazole.

---

|                 |            |
|-----------------|------------|
| N(1)-N(2)       | 1.3555(14) |
| N(1)-C(9)       | 1.3750(16) |
| N(1)-C(10)      | 1.4368(15) |
| N(2)-C(7)       | 1.3482(14) |
| C(1)-H(1)       | 0.9500     |
| C(1)-C(2)       | 1.3884(17) |
| C(1)-C(6)       | 1.3950(17) |
| C(2)-H(2)       | 0.9500     |
| C(2)-C(3)       | 1.3903(17) |
| C(3)-H(3)       | 0.9500     |
| C(3)-C(4)       | 1.3874(19) |
| C(4)-H(4)       | 0.9500     |
| C(4)-C(5)       | 1.3875(17) |
| C(5)-H(5)       | 0.9500     |
| C(5)-C(6)       | 1.3979(16) |
| C(6)-C(7)       | 1.4518(16) |
| C(7)-C(8)       | 1.3996(16) |
| C(8)-H(8)       | 0.9500     |
| C(8)-C(9)       | 1.3656(17) |
| C(9)-H(9)       | 0.9500     |
| C(10)-C(11)     | 1.3925(17) |
| C(10)-C(15)     | 1.3947(17) |
| C(11)-H(11)     | 0.9500     |
| C(11)-C(12)     | 1.3868(17) |
| C(12)-H(12)     | 0.9500     |
| C(12)-C(13)     | 1.3911(18) |
| C(13)-H(13)     | 0.9500     |
| C(13)-C(14)     | 1.3881(18) |
| C(14)-H(14)     | 0.9500     |
| C(14)-C(15)     | 1.3891(17) |
| C(15)-H(15)     | 0.9500     |
|                 |            |
| N(2)-N(1)-C(9)  | 111.56(10) |
| N(2)-N(1)-C(10) | 120.12(10) |
| C(9)-N(1)-C(10) | 128.31(10) |
| C(7)-N(2)-N(1)  | 104.93(9)  |
| C(2)-C(1)-H(1)  | 119.8      |
| C(2)-C(1)-C(6)  | 120.33(11) |
| C(6)-C(1)-H(1)  | 119.8      |
| C(1)-C(2)-H(2)  | 119.8      |
| C(1)-C(2)-C(3)  | 120.42(12) |
| C(3)-C(2)-H(2)  | 119.8      |
| C(2)-C(3)-H(3)  | 120.3      |
| C(4)-C(3)-C(2)  | 119.36(11) |
| C(4)-C(3)-H(3)  | 120.3      |
| C(3)-C(4)-H(4)  | 119.7      |
| C(3)-C(4)-C(5)  | 120.63(11) |
| C(5)-C(4)-H(4)  | 119.7      |
| C(4)-C(5)-H(5)  | 119.9      |

|                   |            |
|-------------------|------------|
| C(4)-C(5)-C(6)    | 120.16(11) |
| C(6)-C(5)-H(5)    | 119.9      |
| C(1)-C(6)-C(5)    | 119.10(11) |
| C(1)-C(6)-C(7)    | 119.94(10) |
| C(5)-C(6)-C(7)    | 120.97(11) |
| N(2)-C(7)-C(6)    | 119.97(10) |
| N(2)-C(7)-C(8)    | 110.93(10) |
| C(8)-C(7)-C(6)    | 129.10(11) |
| C(7)-C(8)-H(8)    | 127.0      |
| C(9)-C(8)-C(7)    | 105.98(11) |
| C(9)-C(8)-H(8)    | 127.0      |
| N(1)-C(9)-H(9)    | 126.7      |
| C(8)-C(9)-N(1)    | 106.60(11) |
| C(8)-C(9)-H(9)    | 126.7      |
| C(11)-C(10)-N(1)  | 119.55(11) |
| C(11)-C(10)-C(15) | 120.08(11) |
| C(15)-C(10)-N(1)  | 120.37(11) |
| C(10)-C(11)-H(11) | 120.0      |
| C(12)-C(11)-C(10) | 119.92(11) |
| C(12)-C(11)-H(11) | 120.0      |
| C(11)-C(12)-H(12) | 119.9      |
| C(11)-C(12)-C(13) | 120.28(11) |
| C(13)-C(12)-H(12) | 119.9      |
| C(12)-C(13)-H(13) | 120.2      |
| C(14)-C(13)-C(12) | 119.61(11) |
| C(14)-C(13)-H(13) | 120.2      |
| C(13)-C(14)-H(14) | 119.7      |
| C(13)-C(14)-C(15) | 120.62(11) |
| C(15)-C(14)-H(14) | 119.7      |
| C(10)-C(15)-H(15) | 120.3      |
| C(14)-C(15)-C(10) | 119.49(11) |
| C(14)-C(15)-H(15) | 120.3      |

---

Symmetry transformations used to generate equivalent atoms:

Table S4. Anisotropic displacement parameters ( $\text{\AA}^2 \times 10^3$ ) for 1,3-diphenyl-1H-pyrazole. The anisotropic

The displacement factor exponent takes the form:  $-2\pi^2[h^2 a^2 U_{11} + \dots + 2 h k a^* b^* U_{12}]$

|       | U <sub>11</sub> | U <sub>22</sub> | U <sub>33</sub> | U <sub>23</sub> | U <sub>13</sub> | U <sub>12</sub> |
|-------|-----------------|-----------------|-----------------|-----------------|-----------------|-----------------|
| N(1)  | 26(1)           | 24(1)           | 26(1)           | -1(1)           | 1(1)            | -1(1)           |
| N(2)  | 24(1)           | 22(1)           | 24(1)           | 1(1)            | 3(1)            | 0(1)            |
| C(1)  | 22(1)           | 28(1)           | 24(1)           | -2(1)           | 3(1)            | -1(1)           |
| C(2)  | 25(1)           | 31(1)           | 26(1)           | 1(1)            | -1(1)           | 1(1)            |
| C(3)  | 29(1)           | 31(1)           | 24(1)           | -1(1)           | 3(1)            | -6(1)           |
| C(4)  | 26(1)           | 30(1)           | 28(1)           | -5(1)           | 8(1)            | -4(1)           |
| C(5)  | 23(1)           | 25(1)           | 30(1)           | -4(1)           | 4(1)            | -1(1)           |
| C(6)  | 23(1)           | 22(1)           | 23(1)           | -4(1)           | 1(1)            | -3(1)           |
| C(7)  | 19(1)           | 20(1)           | 22(1)           | -4(1)           | 1(1)            | -1(1)           |
| C(8)  | 27(1)           | 26(1)           | 28(1)           | -4(1)           | 2(1)            | 3(1)            |
| C(9)  | 27(1)           | 22(1)           | 29(1)           | -1(1)           | -1(1)           | 3(1)            |
| C(10) | 23(1)           | 20(1)           | 26(1)           | -1(1)           | 2(1)            | -4(1)           |
| C(11) | 26(1)           | 24(1)           | 29(1)           | 1(1)            | 3(1)            | 1(1)            |
| C(12) | 31(1)           | 26(1)           | 26(1)           | 4(1)            | 3(1)            | 0(1)            |
| C(13) | 25(1)           | 29(1)           | 28(1)           | -1(1)           | 6(1)            | -3(1)           |
| C(14) | 22(1)           | 28(1)           | 33(1)           | 1(1)            | 2(1)            | 0(1)            |
| C(15) | 23(1)           | 26(1)           | 27(1)           | 3(1)            | -1(1)           | -2(1)           |

Table S5. Hydrogen coordinates ( $\times 10^4$ ) and isotropic displacement parameters ( $\text{\AA}^2 \times 10^3$ ) for 1,3-diphenyl-1H-pyrazole.

|       | x     | y    | z    | U(eq) |
|-------|-------|------|------|-------|
| H(1)  | 1952  | 7423 | 5899 | 29    |
| H(2)  | 2044  | 8608 | 4986 | 33    |
| H(3)  | 5198  | 8153 | 4372 | 33    |
| H(4)  | 8313  | 6550 | 4692 | 34    |
| H(5)  | 8286  | 5397 | 5613 | 31    |
| H(8)  | 7618  | 3841 | 6450 | 32    |
| H(9)  | 6192  | 3332 | 7458 | 31    |
| H(11) | 4512  | 3897 | 8327 | 32    |
| H(12) | 2240  | 4143 | 9154 | 33    |
| H(13) | -1187 | 5653 | 9110 | 33    |
| H(14) | -2335 | 6910 | 8235 | 33    |
| H(15) | -106  | 6649 | 7400 | 31    |



Table S6. Torsion angles [°] for 1,3-diphenyl-1H-pyrazole.

---

|                         |             |
|-------------------------|-------------|
| N(1)-N(2)-C(7)-C(6)     | 179.43(9)   |
| N(1)-N(2)-C(7)-C(8)     | -0.01(13)   |
| N(1)-C(10)-C(11)-C(12)  | -179.96(11) |
| N(1)-C(10)-C(15)-C(14)  | -179.60(10) |
| N(2)-N(1)-C(9)-C(8)     | -0.19(14)   |
| N(2)-N(1)-C(10)-C(11)   | -167.86(10) |
| N(2)-N(1)-C(10)-C(15)   | 11.89(16)   |
| N(2)-C(7)-C(8)-C(9)     | -0.10(14)   |
| C(1)-C(2)-C(3)-C(4)     | -0.91(19)   |
| C(1)-C(6)-C(7)-N(2)     | -12.69(16)  |
| C(1)-C(6)-C(7)-C(8)     | 166.65(12)  |
| C(2)-C(1)-C(6)-C(5)     | 0.40(17)    |
| C(2)-C(1)-C(6)-C(7)     | -179.56(11) |
| C(2)-C(3)-C(4)-C(5)     | 0.19(18)    |
| C(3)-C(4)-C(5)-C(6)     | 0.83(18)    |
| C(4)-C(5)-C(6)-C(1)     | -1.11(17)   |
| C(4)-C(5)-C(6)-C(7)     | 178.85(10)  |
| C(5)-C(6)-C(7)-N(2)     | 167.35(11)  |
| C(5)-C(6)-C(7)-C(8)     | -13.31(18)  |
| C(6)-C(1)-C(2)-C(3)     | 0.61(18)    |
| C(6)-C(7)-C(8)-C(9)     | -179.48(11) |
| C(7)-C(8)-C(9)-N(1)     | 0.17(13)    |
| C(9)-N(1)-N(2)-C(7)     | 0.12(13)    |
| C(9)-N(1)-C(10)-C(11)   | 12.41(18)   |
| C(9)-N(1)-C(10)-C(15)   | -167.84(11) |
| C(10)-N(1)-N(2)-C(7)    | -179.65(10) |
| C(10)-N(1)-C(9)-C(8)    | 179.56(11)  |
| C(10)-C(11)-C(12)-C(13) | -0.41(19)   |
| C(11)-C(10)-C(15)-C(14) | 0.15(18)    |
| C(11)-C(12)-C(13)-C(14) | 0.10(19)    |
| C(12)-C(13)-C(14)-C(15) | 0.35(19)    |
| C(13)-C(14)-C(15)-C(10) | -0.47(18)   |
| C(15)-C(10)-C(11)-C(12) | 0.29(18)    |

---

## References

- <sup>1</sup> J. P. Perdew, K. Burke, M. Ernzerhof, *Phys. Rev. Lett.*, 1996, **77**, 3865-3868.
- <sup>2</sup> C. Adamo, V. Barone, *J. Chem. Phys.*, 1999, **110**, 6158-6170.
- <sup>3</sup> F. Weigend, R. Ahlrichs, *Phys. Chem. Chem. Phys.*, 2005, **7**, 3297-3305.
- <sup>4</sup> F. Weigend, *Phys. Chem. Chem. Phys.*, 2006, **8**, 1057-1065.
- <sup>5</sup> S. Grimme, S. Ehrlich, L. Goerigk, *J. Comput. Chem.*, 2011, **32**, 1456.
- <sup>6</sup> S. Grimme, J. Antony, S. Ehrlich, H. Krieg, *J. Chem. Phys.*, 2010, **132**, 154104.
- <sup>7</sup> M. J. Frisch, G. W. Trucks, H. B. Schlegel, G. E. Scuseria, M. A. Robb, J. R. Cheeseman, G. Scalmani, V. Barone, G. A. Petersson, H. Nakatsuji, X. Li, M. Caricato, A. V. Marenich, J. Bloino, B. G. Janesko, R. Gomperts, B. Mennucci, H. P. Hratchian, J. V. Ortiz, A. F. Izmaylov, J. L. Sonnenberg, D. F. Williams-Young, Ding, F. Lipparini, F. Egidi, J. Goings, B. Peng, A. Petrone, T. Henderson, D. Ranasinghe, V. G. Zakrzewski, J. Gao, N. Rega, G. Zheng, W. Liang, M. Hada, M. Ehara, K. Toyota, R. Fukuda, J. Hasegawa, M. Ishida, T. Nakajima, Y. Honda, O. Kitao, H. Nakai, T. Vreven, K. Throssell, J. A., Jr. Montgomery, J. E. Peralta, F. Ogliaro, M. J. Bearpark, J. J. Heyd, E. N. Brothers, K. N. Kudin, V. N. Staroverov, T. A. Keith, R. Kobayashi, J. Normand, K. Raghavachari, A. P. Rendell, J. C. Burant, S. S. Iyengar, J. Tomasi, M. Cossi, J. M. Millam, M. Klene, C. Adamo, R. Cammi, J. W. Ochterski, R. L. Martin, K. Morokuma, O. Farkas, J. B. Foresman, D. J. Fox, Gaussian 16 Revision C.01, Inc., Wallingford CT, 2016.
- <sup>8</sup> V. Marenich, C. J. Cramer, D. G. Truhlar, *J. Phys. Chem. B.*, 2009, **113**, 6378-6396.
- <sup>9</sup> C. Y. Legault, CYLview20; Université de Sherbrooke, 2020. <http://www.cylview.org>.
- <sup>10</sup> CrysAlisPro. Version 1.171.41.106a. *Rigaku Oxford Diffraction*, **2021**.
- <sup>11</sup> G. M. Sheldrick, *Acta Cryst.*, 2015, **A71**, 1, 3-8.
- <sup>12</sup> G. M. Sheldrick, *Acta Cryst.*, 2015, **C71**, 1, 3-8.
- <sup>13</sup> O. V. Dolomanov, L. J. Bourhis, R. J. Gildea, J. A. K. Howard, H. Puschmann, *J. Appl. Cryst.* 2009, **42**, 2, 339-341.
- <sup>14</sup> C. F. Macrae, I. Sovago, S. J. Cottrell, P. T. A. Galek, P. McCabe, E. Pidcock, M. Platings, G. P. Shields, J. S. Stevens, M. Towler, P. A. Wood, *J. Appl. Cryst.*, 2020, **53**, 226-235.
- <sup>15</sup> R. SanMartin, E. Martínez de Marigorta, E. Domínguez, *Tetrahedron*, 1994, **50**, 2255-2264.
- <sup>16</sup> R. Olivera, R. SanMartin, E. Domínguez, *J. Org. Chem.*, 2000, **65**, 7010-7019.
- <sup>17</sup> S. Hernández, I. I. Moreno, R. SanMartin, G. Gómez, M. T. Herrero, E. Domínguez. *J. Org. Chem.*, 2010, **75**, 2, 434-441.
